# Supplementary material for: Stochastic processes constrain the within and between host evolution of influenza virus
Source: eLife journal article supplement (doi:10.7554/elife.35962), 2018-04-23
Supplement: supp [file elife-35962-supp-v1.zip]

Archive with 26 entries (26 files):
- elife_poa_e35962_Figure_3_source_data_6.csv
- elife_poa_e35962_Figure_1_source_data_1.csv
- elife_poa_e35962_Figure_3_figure_supplement_1.pdf
- elife_poa_e35962_Figure_2_source_data_5.csv
- elife_poa_e35962_Figure_1_figure_supplement_3.pdf
- elife_poa_e35962_Transparent_Reporting_File.docx
- elife_poa_e35962_Supplementary_File_3.docx
- elife_poa_e35962_Figure_2_source_data_4.csv
- elife_poa_e35962_Figure_2_source_data_2.csv
- elife_poa_e35962_Figure_1_source_data_3.csv
- elife_poa_e35962_Figure_1_figure_supplement_4.pdf
- elife_poa_e35962_Figure_1_source_data_4.csv
- elife_poa_e35962_Figure_2_source_data_3.csv
- elife_poa_e35962_Figure_3_source_data_1.csv
- elife_poa_e35962_Figure_1_source_data_2.csv
- elife_poa_e35962_Figure_3_source_data_2.csv
- elife_poa_e35962_Figure_1_figure_supplement_1.pdf
- elife_poa_e35962_Figure_3_source_data_4.csv
- elife_poa_e35962_Figure_2_source_data_1.csv
- elife_poa_e35962_Supplementary_File_2.docx
- elife_poa_e35962_Supplementary_File_1.docx
- elife_poa_e35962_Figure_3_source_data_7.csv
- elife_poa_e35962_Figure_2_figure_supplement_1.pdf
- elife_poa_e35962_Figure_3_source_data_3.csv
- elife_poa_e35962_Figure_3_source_data_5.csv
- elife_poa_e35962_Figure_1_figure_supplement_2.pdf
