# Supplementary material for: Stochastic processes constrain the within and between host evolution of influenza virus
Source: eLife journal article supplement (doi:10.7554/elife.35962), 2018-04-23
Supplement: supp [file elife-35962-supp-v1.zip › elife_poa_e35962_Figure_1_figure_supplement_1.pdf]

Figure 1-figure supplement 1

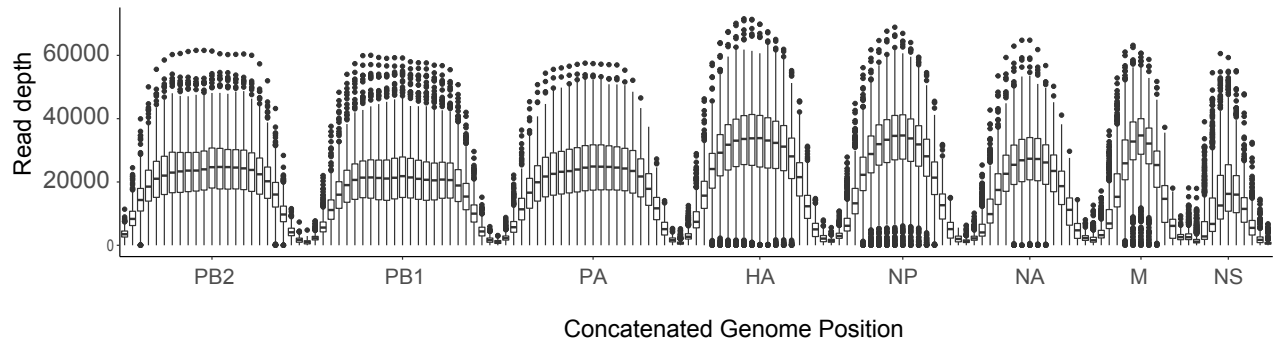

Figure 1-figure supplement 1. Sequence coverage for all samples. For each sample, the sliding window mean coverage was calculated using a window size of 200 and a step of 100. The distributions of these means are plotted as box plots (median, 25th and 75th percentiles, whiskers extend to most extreme point within median  $\pm 1.5 \times \text{IQR}$ ) where the y-axis represents the read depth and the x-axis indicates the position of the window in a concatenated IAV genome.
