# Supplementary material for: Stochastic processes constrain the within and between host evolution of influenza virus
Source: eLife journal article supplement (doi:10.7554/elife.35962), 2018-04-23

Figure 1-figure supplement 3

Figure 1-figure supplement 3. Approximate maximum likelihood trees of the concatenated coding sequences for high quality H3N2 samples. The branches are colored by season; the tip identifiers are colored by household. Arrows with numbers indicate consensus and putative minor haplotypes for samples with greater than 10 iSNV. Trees were made using FastTree (Price et al. 2010). “Wisconsin\_2005” refers to A/Wisconsin/67/2005(H3N2). “Perth”, “Victoria”, and “HK” refer to sequences from plasmid clones derived from clinical samples corresponding to A/Perth/16/2009, A/Victoria/361/2011, A/Hong Kong/4801/2014, respectively.

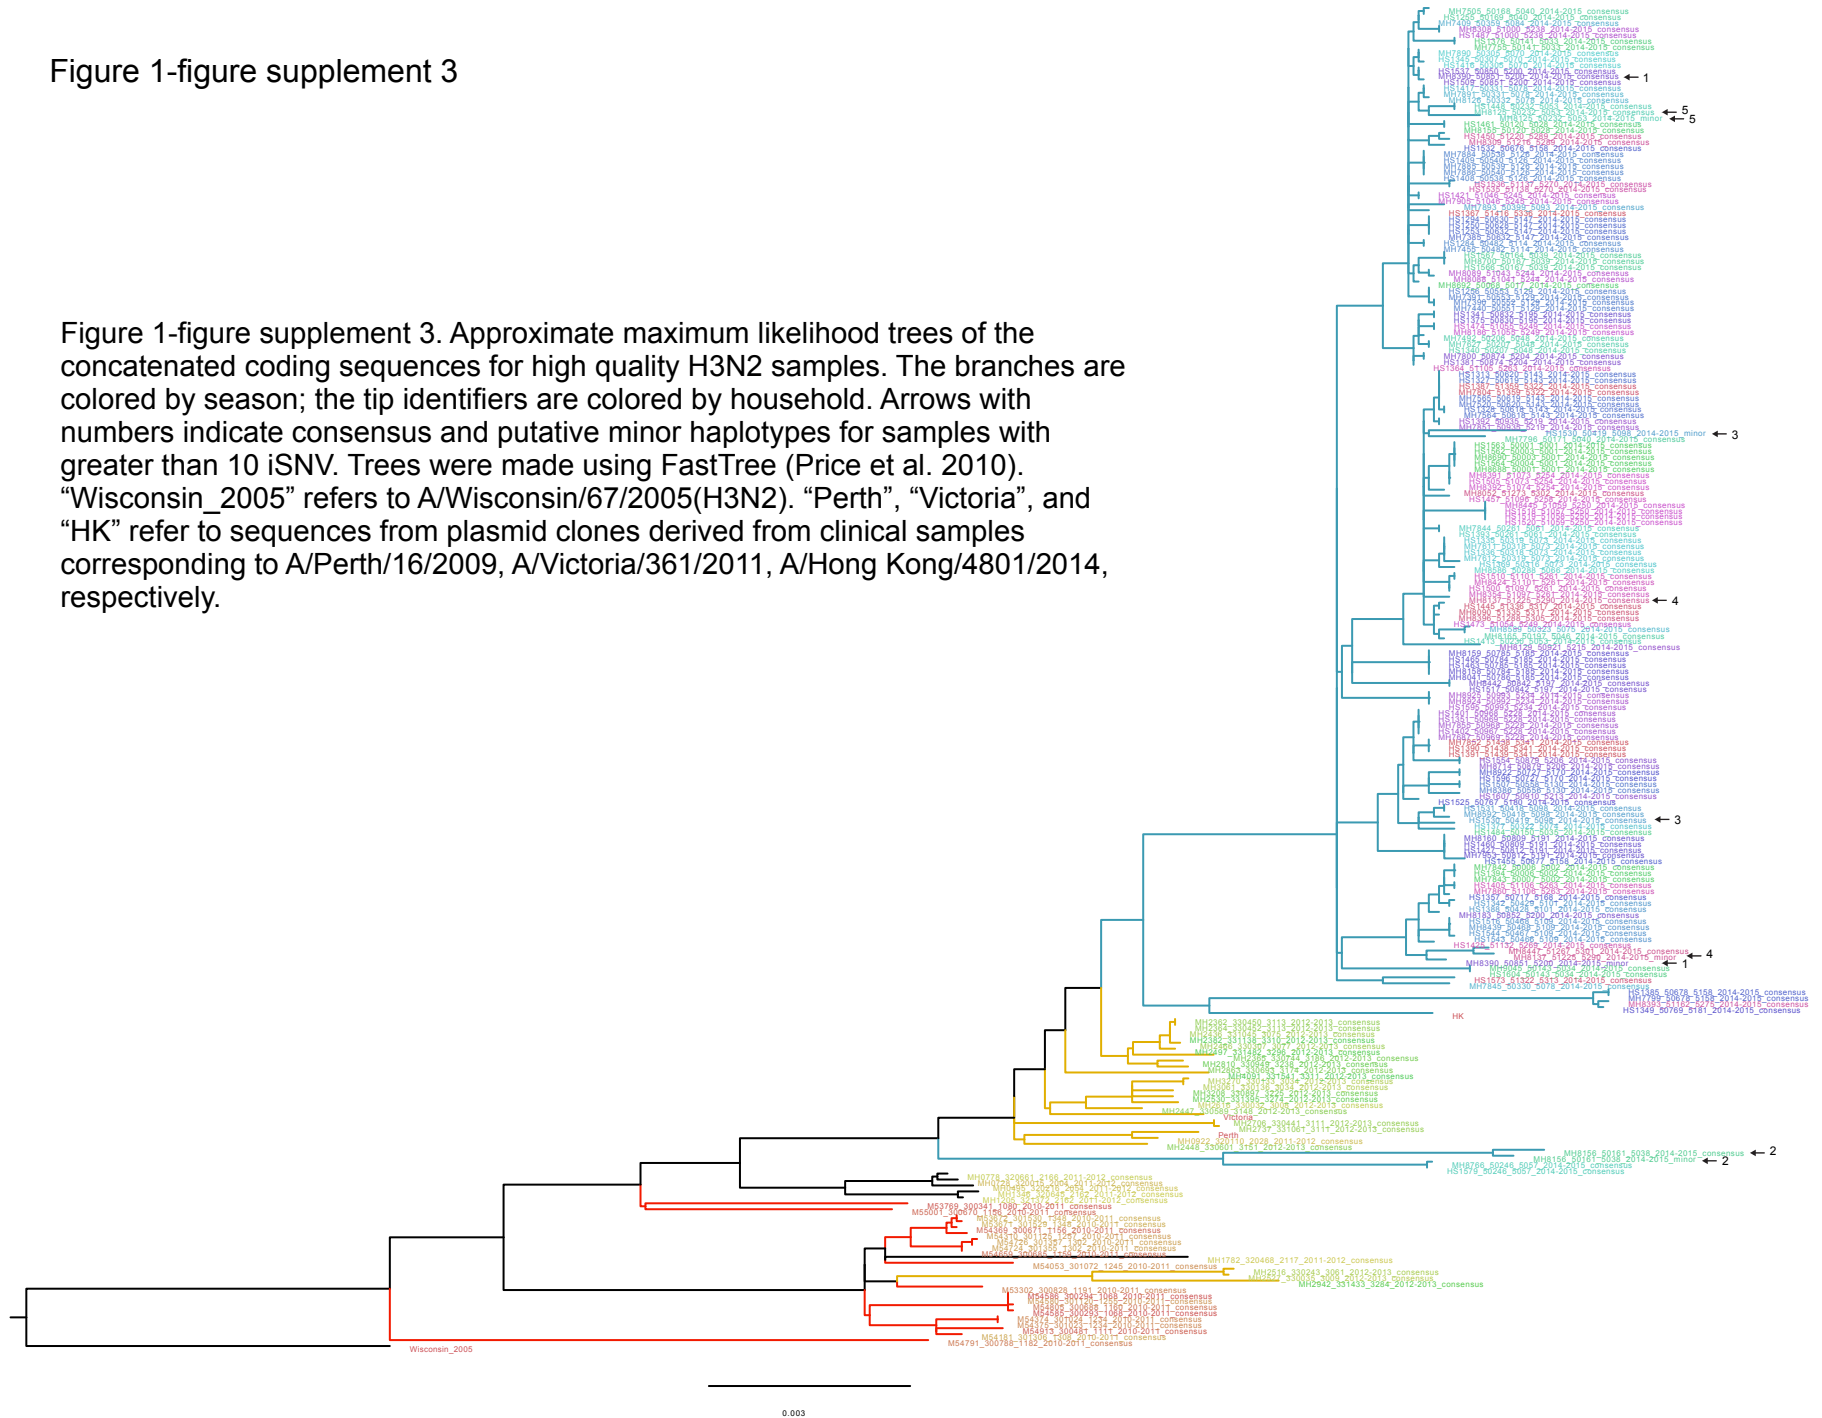

Supplement: supp [file elife-35962-supp-v1.zip › elife_poa_e35962_Figure_1_figure_supplement_3.pdf]
