# Supplementary material for: Stochastic processes constrain the within and between host evolution of influenza virus
Source: eLife journal article supplement (doi:10.7554/elife.35962), 2018-04-23
Supplement: supp [file elife-35962-supp-v1.zip › elife_poa_e35962_Figure_1_figure_supplement_4.pdf]

Figure 1-figure supplement 4

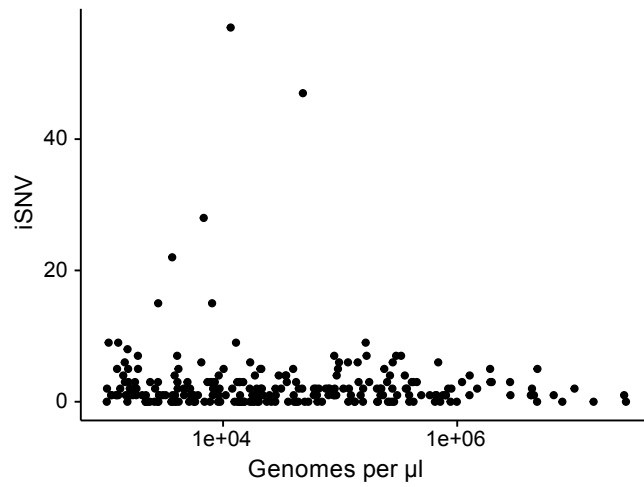

Figure 1-figure supplement 4. The effect of titer on the number of iSNV identified. (A) The number of iSNV identified in an isolate (y-axis) plotted against the titer (x-axis, genomes/ $\mu\text{l}$  transport media).
