# Supplementary material for: Stochastic processes constrain the within and between host evolution of influenza virus
Source: eLife journal article supplement (doi:10.7554/elife.35962), 2018-04-23
Supplement: supp [file elife-35962-supp-v1.zip › elife_poa_e35962_Figure_1_source_data_1.csv]

	SPECID	days.post.symptom.onset	genomes.per.ul
1	M53301	3	46.7993080148435
2	M53302	1	219156.158420374
3	M53319	6	2899.70146081732
4	M53358	1	9.08292005420645
5	M53375	1	30.1712700630947
6	M53421	1	0.410353782424796
7	M53422	1	9.2874145797768
8	M53480	3	0.325013008490666
9	M53512	1	762.011382522068
10	M53513	1	92.0571104653509
11	M53522	3	0.425421821845878
12	M53523	0	79198.3795684777
13	M53524	2	0.358694003804555
14	M53582	3	NA
15	M53583	3	0.584433211819713
16	M53587	2	410.748645363728
17	M53588	2	68.1023144952593
18	M53602	5	40.5801621054159
19	M53651	4	0.516634240307933
20	M53668	2	29.2492355109235
21	M53671	2	8213.44555096298
22	M53672	2	1475.67538100647
23	M53695	1	378.919090088429
24	M53765	2	19.6969986779849
25	M53769	3	5074.68547281161
26	M53808	2	1.04855291009713
27	M53874	4	3.90947760688968
28	M53913	3	NA
29	M53950	1	2932.3350601753
30	M53953	4	121.736399158206
31	M53991	1	96.6266990079247
32	M54028	1	212.860677265744
33	M54036	2	213.06721009858
34	M54053	1	3833.59994206691
35	M54055	2	1.19482961764258
36	M54056	2	34.2745635936585
37	M54062	3	3674.80689249517
38	M54126	7	1.26715485431652
39	M54181	2	13865.5363796139
40	M54192	4	4.51547287431773
41	M54198	2	214.441567665263
42	M54205	1	1271.01349865439
43	M54206	3	4093.62592365556
44	M54207	1	2779.99848202134
45	M54216	2	522.088315285781
46	M54217	0	2.5509647084018
47	M54218	4	5.65365388928705
48	M54307	2	324.177459741566
49	M54310	2	27908.0404577259
50	M54369	2	59763.7351216904
51	M54370	5	148.86561025177
52	M54371	6	29.669368829502
53	M54374	1	6943.63756329413
54	M54375	2	6096.72583328724
55	M54379	3	0.690528182801956
56	M54380	2	321.992871479378
57	M54391	2	125.191501183347
58	M54454	4	37.4067921659949
59	M54492	2	0.859561107588495
60	M54517	1	2.20357674779541
61	M54529	2	717.32476823772
62	M54580	1	4642.37181480468
63	M54581	2	293.073827492576
64	M54585	3	13226.3813529662
65	M54586	4	35040.7468865956
66	M54587	1	13.2096873033723
67	M54591	3	11262.3394180154
68	M54659	1	97843.8432923421
69	M54660	3	0.410605114011311
70	M54716	1	NA
71	M54724	1	1909018.08891275
72	M54725	3	4.45774063019631
73	M54726	1	92621.0369990775
74	M54791	1	14861.2960289796
75	M54805	1	118910.004033692
76	M54842	2	5.29098879792959
77	M54876	3	1.50186928221707
78	M54909	2	255.937625538834
79	M54913	0	29882.6472446822
80	M54918	4	151.048151691079
81	M54955	2	209.637649653923
82	M54956	2	140.312946041225
83	M54957	0	28.0178948558397
84	M55000	1	2.01661627242959
85	M55001	3	688145.894945026
86	M55002	3	2.05122164872543
87	MH0495	1	1691.79099377906
88	MH0706	3	15.9250788333119
89	MH0728	1	9182.881010277
90	MH0778	1	1768.64284990813
91	MH0922	3	4079.04204651563
92	MH1039	2	1065.66469579254
93	MH1040	2	42.7234574279308
94	MH1047	4	7.94032340301729
95	MH1143	1	255697.363774477
96	MH1144	6	254.314620827523
97	MH1183	2	20.9789465254418
98	MH1184	3	11.1398517954044
99	MH1205	0	24898.0411899606
100	MH1305	2	0.461753521744976
101	MH1306	3	2.52834980019313
102	MH1337	3	463.800371417471
103	MH1346	1	1242.59728309241
104	MH1431	2	18.0734023736417
105	MH1435	3	NA
106	MH1770	2	5.05022734713159
107	MH1782	1	69895.7661096343
108	MH1795	1	729.732028209808
109	MH1823	0	1.08370426147354
110	MH2361	1	1.46516122451265
111	MH2362	1	1015.12056176152
112	MH2363	2	14.9558397144667
113	MH2364	1	210250.301307777
114	MH2365	2	2761.75930045141
115	MH2382	2	43764.8354517459
116	MH2436	1	18420.3780051986
117	MH2447	1	15175.1213044972
118	MH2448	1	53450.198869387
119	MH2455	2	896.853377369191
120	MH2456	1	1.59604635050693
121	MH2460	0	28.6890134368615
122	MH2463	6	34.3332460250101
123	MH2466	3	12513.5984006548
124	MH2497	1	40505.9444029598
125	MH2501	3	516.441776101334
126	MH2516	2	13843.4785181133
127	MH2527	1	423428.651923576
128	MH2530	3	16950.8355187754
129	MH2573	0	90.3307412785643
130	MH2615	3	833.523237084026
131	MH2616	3	25839.1816455019
132	MH2618	3	1.38153366189279
133	MH2619	6	2.10107608929121
134	MH2636	5	0.676206111052767
135	MH2652	1	25.3512306141955
136	MH2704	1	43.5026869390934
137	MH2706	2	42070.164450003
138	MH2736	3	23.0232173918469
139	MH2737	5	2179.71911721178
140	MH2783	3	48.2013762271107
141	MH2810	1	3643.47126808786
142	MH2811	2	80.2020179026133
143	MH2860	1	75.8180312828051
144	MH2863	2	9447.36103911331
145	MH2936	2	266500.872414677
146	MH2937	4	274.487050096869
147	MH2942	1	1523.46729750887
148	MH2994	1	0.551654549802525
149	MH2997	0	218.955384211118
150	MH3061	2	14111.8307187602
151	MH3101	0	65.0864124650954
152	MH3156	6	23.9699889495806
153	MH3207	6	34.1453027486328
154	MH3208	1	20188.7366542645
155	MH3268	3	8.48539199928913
156	MH3270	4	5632.71832038632
157	MH3275	3	345.496505578575
158	MH3314	3	19.3046524945194
159	MH3345	1	410.961185401426
160	MH3364	2	71.6607089025707
161	MH3423	0	92.2451072309738
162	MH3424	4	76.7816118370299
163	MH3425	1	165.179681154634
164	MH3426	1	67.3768407934952
165	MH3518	4	71.502041564122
166	MH3529	3	137.981856947395
167	MH3662	2	83.4220786779341
168	MH3907	1	74.9661265417634
169	MH3978	2	14.7658000044971
170	MH3979	1	67.0245934711585
171	MH3980	2	156.98340291525
172	MH4087	1	373.828933611736
173	MH4091	3	9060.77801242841
174	MH4154	0	73.6413966213129
175	MH4507	5	64.9708841555563
176	MH4531	5	86.0960717475144
177	MH4546	2	79.9999404979939
178	MH5186	0	0.522590795047642
179	MH5193	0	3618.13767545962
180	MH5194	1	2801.77185619479
181	MH5229	0	14314.4964109958
182	MH5245	1	132735.469418344
183	MH5295	1	79612.8367170207
184	MH5300	4	1596.1242535549
185	MH5343	5	0.841931409831267
186	MH5405	2	1544.87934338975
187	MH5448	2	7.39832067344438
188	MH5449	1	10.5746525095754
189	MH5455	6	442.40215301781
190	MH5499	3	28187.5177908308
191	MH5538	3	68.6294450381347
192	MH5543	7	4.72974590841922
193	MH5544	3	846.684155440758
194	MH5545	4	22.2776535335003
195	MH5546	4	1052.50792848656
196	MH5548	2	1875.99515939424
197	MH5549	3	4052.13230674144
198	MH5551	0	44.322015642206
199	MH5552	3	520.971881885411
200	MH5639	2	143.825101691036
201	MH5641	6	21.4666152477167
202	MH5644	6	71.0378408510352
203	MH5645	1	123515.964951814
204	MH5646	3	5408.57015920858
205	MH5648	3	102.315353768266
206	MH5649	4	6.8569065178789
207	MH5651	4	39683.4777740364
208	MH5655	2	4.66342682302927
209	MH5656	1	207356.244335153
210	MH5677	2	90803.9276648357
211	MH5679	4	1527.60922145889
212	MH5680	2	8430.25112775548
213	MH5708	3	241.245223753947
214	MH5709	3	20822.7906689391
215	MH5712	4	89018.8405732259
216	MH5726	5	719.707186304439
217	MH5817	3	4157.93164051067
218	MH5847	5	19.6927216957288
219	MH5848	2	18698.0553352145
220	MH5849	2	5621.30700032751
221	MH5943	5	6.07815028492015
222	MH6042	1	3889.79197113413
223	MH6260	1	4605.19465723007
224	MH6262	1	3857.99103403265
225	MH6638	4	12.6610672049884
226	HS1563	0	106549.279906961
227	MH8688	6	5136.8904129294
228	MH8689	3	788.267331470985
229	HS1562	0	7744.06904980928
230	MH8690	6	1322.73481222846
231	HS1564	0	582883.263008704
232	MH8691	6	152.872513601313
233	HS1394	0	876865.422742531
234	MH7842	1	256214.791164166
235	HS1395	0	128.704240017915
236	MH7843	1	88186.1912645281
237	MH9547	2	577.658476965937
238	MH8583	4	24.9877785122308
239	MH8584	3	28.1426953221488
240	MH7319	2	0.501277420543928
241	HS1568	1	1.23299071297746
242	MH8692	4	1872.17101333886
243	HS1569	4	2.91854600136821
244	MH8693	7	86.3152469467069
245	MH8155	1	279417.025440071
246	HS1461	1	65775.7564564245
247	MH8085	4	0.39148305921058
248	MH7642	3	345.491032387086
249	MH7320	7	0
250	HS1376	1	1099047.07427442
251	MH7755	2	9328.66776540432
252	HS1604	1	409463.82903885
253	MH9045	2	13777.0277415602
254	MH8299	0	33.5139473175336
255	HS1485	0	69.5160849766747
256	MH8300	0	36.3621392170281
257	HS1484	0	4174.27567066476
258	MH8156	3	8053.85859260289
259	MH7321	4	0
260	MH8697	5	8.2393512197833
261	HS1567	2	2367.27743981759
262	HS1566	1	3225.36866342537
263	MH8700	4	20695.5542972638
264	MH7505	1	7358.16207143003
265	HS1255	3	157207.456166429
266	MH7389	4	751.813020390587
267	MH7796	0	2033.4443001354
268	MH8165	2	4964.59511353398
269	HS1297	0	0
270	MH7492	1	371615.00382535
271	HS1340	0	4350989.14626686
272	MH7627	1	281214.85983637
273	HS1413	0	206147.921030916
274	MH7882	4	4.7996295674092
275	HS1448	1	17739.5303778508
276	MH8125	3	2789.66688089761
277	HS1579	0	44344.6289111341
278	MH8766	4	168187.646394325
279	MH10202	1	62.077650457508
280	HS1393	1	264691.327274099
281	MH7844	2	19622.3516538187
282	MH8586	3	1115.01755241528
283	MH8588	1	240.215275866953
284	HS1416	2	31296.7324317693
285	MH7890	5	93437.9191253739
286	HS1345	1	8164.65663560268
287	MH7636	2	14.6763259290631
288	HS1369	0	177101.649935946
289	HS1336	0	1971855.82345112
290	MH7611	3	8499.4537113383
291	HS1335	0	224616.057124778
292	MH7612	1	654239.112547579
293	HS1377	0	2181.27889431404
294	MH7787	2	58.6068895558995
295	MH8589	5	1272.40510302206
296	MH7845	2	7848.71914528868
297	HS1399	2	0.412832266212462
298	HS1417	0	1105.33294512701
299	MH7891	1	27992.2367742622
300	MH8126	4	5227.76893582715
301	MH7409	3	13688.5891107403
302	MH8086	2	240.188108521706
303	MH7893	0	420896.458768179
304	MH7628	4	13.2598271624738
305	HS1234	0	0
306	MH7346	2	291.298572605307
307	MH8703	2	29.5105853017831
308	HS1531	1	75379.7949599435
309	MH8592	2	251821.707281717
310	HS1530	4	11606.1745188652
311	MH8593	7	5.42973329464226
312	HS1388	0	306785.945382733
313	MH7797	1	647.011907725862
314	HS1342	0	10036058.3542358
315	MH7637	4	136.855731239812
316	HS1493	1	22.290888348728
317	MH8313	4	5.48965623455655
318	MH8385	4	9.9366352747088
319	HS1543	0	19379.1694588452
320	MH8594	5	617.245182590643
321	HS1544	0	363965.414962725
322	HS1516	0	5295.87014994404
323	MH8439	2	13961.6359922664
324	MH8596	4	8.90462622641777
325	HS1325	0	107.97789811388
326	MH7536	4	83.9316889908924
327	MH7455	1	1273110.28189008
328	HS1284	1	143722.830467899
329	HS1408	-2	331469.738190488
330	MH7884	1	17044.0229788895
331	HS1410	0	26.0340734437374
332	MH7885	3	13306.0524822515
333	HS1409	0	9153.80335873375
334	MH7886	3	2627.54866436138
335	HS1273	0	168.993732001001
336	MH7440	1	1554.71597045394
337	MH7390	0	34105.1647518907
338	HS1256	0	2828096.10866543
339	MH7391	1	8010.33563290432
340	MH8386	4	62136.5646392847
341	HS1507	1	1919961.32914157
342	MH8358	1	37.0045959927461
343	HS1318	2	40.5266646804729
344	MH7564	1	20444.5236015679
345	HS1328	1	389589.15713512
346	MH7565	0	232152.617532256
347	HS1327	0	789642.406965391
348	HS1313	0	4292191.10137329
349	MH7520	2	2839.40450937719
350	HS1250	0	2849175.46728811
351	HS1294	1	1643.25210769416
352	MH7325	3	55.5988033469959
353	HS1253	0	14610830.5361565
354	MH7385	1	5769.64676780382
355	HS1532	0	3967.64804297726
356	MH8603	6	82.8692827580171
357	HS1455	0	95791.0224778297
358	MH8127	2	1662.50466117534
359	HS1385	0	27619588.4580095
360	MH7799	3	1240.14033012031
361	HS1352	1	113.717173940529
362	MH7685	3	7.55820334344117
363	HS1357	1	15017.4254643579
364	HS1596	0	492958.78235852
365	MH8922	1	81281.9233428816
366	MH9048	3	27.5903212603416
367	HS1703	0	0
368	MH9964	6	0
369	HS1411	1	157.024647421475
370	MH7887	2	652.626421557915
371	MH8450	0	123.459463345549
372	HS1524	0	44.6106830040724
373	HS1525	0	2283.814785262
374	MH8451	4	991.950838245664
375	HS1349	1	1277931.21094279
376	MH7671	3	19.4909021217341
377	HS1465	0	23642.0487303956
378	MH8158	1	2592.17131944944
379	HS1463	1	156652.286461899
380	MH8159	2	3060.68966075269
381	MH8041	1	6673236.77004296
382	HS1434	1	853.885415858318
383	HS1506	1	193.532479554114
384	MH8389	5	1.6942021398904
385	HS1460	1	277932.346832683
386	MH8160	2	3704.0992750182
387	HS1427	0	20993.5446866126
388	MH7953	1	2189.55112854501
389	MH7756	1	95.7559010189364
390	HS1375	1	1019.78585210983
391	HS1341	0	42048.2628731935
392	MH7639	1	42.43542933956
393	HS1517	0	753947.294546966
394	MH8442	1	221313.744347473
395	HS1537	0	289069.73422093
396	MH8605	5	4.316796417733
397	HS1509	0	117411.864989997
398	MH8390	2	6831.72221223212
399	MH8183	3	47406.83725613
400	MH8184	0	5.40262341931866
401	HS1381	0	1446.10996315801
402	MH7800	1	21196.4885031859
403	HS1554	0	645117.736534352
404	MH8714	3	991734.118237906
405	HS1607	1	801111.638363332
406	MH9121	2	13.7482259916434
407	MH8128	5	58.9290636784329
408	HS1451	0	309.176996287102
409	MH8129	1	1403.69119541999
410	HS1392	0	7903146.88245179
411	MH7851	3	2838.54796531592
412	HS1402	0	35965.7189592646
413	HS1401	1	59552.1759622025
414	MH7855	2	2383.59539700922
415	HS1351	0	4256384.59000529
416	MH7687	1	89830.6666256944
417	MH8177	4	541.771150346375
418	HS1576	1	66.1665672016637
419	MH8763	4	33.3178305394994
420	MH8923	4	41.7439220218878
421	HS1597	1	515.384867152675
422	MH8924	4	8277.11605979195
423	HS1595	2	4840461.42881588
424	MH8925	5	34583.56208775
425	HS1487	0	17815.4093987506
426	MH8308	2	4792.65263937886
427	MH7322	5	0
428	MH8088	4	165252.427224562
429	MH8089	3	6517.77350981211
430	HS1421	1	1813.03726188786
431	MH7905	2	1624.18956305428
432	HS1473	0	837673.865983232
433	MH8185	2	276.977292412806
434	HS1474	0	388359.824187841
435	MH8186	2	10106.674906501
436	HS1518	0	1554.9749301629
437	MH8443	1	189.231415030329
438	HS1519	0	63374.1585294298
439	MH8444	3	292.066530056258
440	HS1520	0	26649748.4124855
441	MH8445	1	891510.933752938
442	HS1505	0	4522342.82269474
443	MH8391	2	21881.0520421267
444	MH8392	5	63966.1974272536
445	HS1457	0	88116.3793907736
446	MH8132	2	136.749073111628
447	MH8354	1	451734.567188031
448	HS1500	1	356720.72525462
449	MH8490	2	83.1797650921894
450	MH8423	2	11.3780772367458
451	MH8424	1	116603.211967698
452	HS1510	1	300681.552869375
453	HS1364	0	1214.56666984432
454	MH7700	2	27.603029778485
455	HS1405	2	133613.14638495
456	MH7860	3	12891.8758595551
457	MH7537	1	333.435337813563
458	HS1425	2	16907.0769443318
459	MH7912	4	61.6491320118992
460	HS1536	0	40112.7407321872
461	MH8611	2	588.296977069103
462	HS1535	0	21449.0690559765
463	MH8612	3	83.9086407826892
464	MH8393	0	663973.765968094
465	MH8178	5	859.929109668945
466	MH9017	2	152.723484652298
467	MH8309	1	2216.07353162953
468	HS1514	3	254.461118248138
469	MH8446	4	47.5190513316272
470	HS1450	-1	1480465.56313596
471	MH8133	2	180.612584187273
472	MH8137	1	48049.9338348692
473	MH8447	1	1450.00424974394
474	MH8052	0	1821.1929941295
475	MH8396	1	49827.884002319
476	MH8179	4	0
477	MH8448	4	238.593337791244
478	HS1573	1	11981.4305272548
479	MH8765	4	113.982616057655
480	MH7323	3	0
481	HS1444	0	11.209230781191
482	MH8090	2	10529.131764907
483	MH8091	0	0.808834595678937
484	HS1445	0	149669.596506264
485	HS1387	5	715985.296300135
486	MH7804	6	18708.6299667928
487	MH8453	4	123.259325956012
488	HS1367	0	795109.522037604
489	HS1390	0	238153.266798938
490	MH7852	1	141146.054111149
491	HS1391	0	4809386.01942255
492	MH7853	2	69.2454927683461
