# Supplementary material for: Stochastic processes constrain the within and between host evolution of influenza virus
Source: eLife journal article supplement (doi:10.7554/elife.35962), 2018-04-23
Supplement: supp [file elife-35962-supp-v1.zip › elife_poa_e35962_Figure_1_source_data_2.csv]

	days.post.symptom.onset	iSNV
1	0	1
2	0	0
3	3	2
4	0	3
5	1	3
6	1	2
7	0	1
8	0	1
9	1	0
10	0	2
11	0	3
12	0	2
13	0	3
14	0	2
15	1	1
16	1	4
17	0	1
18	1	0
19	0	1
20	0	1
21	0	3
22	1	2
23	1	3
24	0	0
25	0	6
26	0	0
27	5	0
28	0	1
29	0	5
30	0	0
31	0	0
32	1	0
33	0	0
34	1	1
35	0	0
36	2	0
37	-2	7
38	0	1
39	0	2
40	2	2
41	0	1
42	1	1
43	2	2
44	0	2
45	0	1
46	1	0
47	-1	2
48	0	5
49	0	1
50	1	0
51	1	2
52	1	0
53	0	0
54	0	2
55	0	1
56	0	0
57	0	1
58	1	4
59	0	1
60	1	3
61	0	0
62	1	7
63	0	1
64	0	1
65	0	1
66	0	1
67	0	1
68	0	0
69	4	57
70	1	2
71	0	0
72	0	2
73	0	1
74	0	0
75	0	2
76	0	2
77	0	0
78	0	0
79	0	2
80	0	1
81	1	1
82	2	0
83	1	2
84	0	2
85	2	5
86	0	1
87	1	3
88	1	1
89	1	2
90	0	2
91	2	2
92	2	1
93	3	2
94	1	0
95	3	22
96	2	3
97	1	9
98	3	2
99	1	3
100	2	0
101	2	2
102	1	0
103	2	1
104	1	1
105	3	3
106	4	3
107	1	6
108	1	5
109	1	1
110	1	3
111	1	2
112	0	4
113	3	6
114	1	1
115	1	4
116	1	3
117	3	3
118	0	1
119	1	5
120	1	0
121	1	3
122	1	2
123	2	5
124	2	3
125	1	5
126	1	1
127	1	2
128	3	2
129	1	4
130	2	2
131	1	2
132	3	0
133	3	0
134	2	4
135	5	5
136	1	4
137	2	3
138	2	4
139	1	1
140	2	0
141	1	1
142	4	1
143	3	4
144	0	0
145	1	0
146	0	0
147	1	0
148	1	1
149	4	2
150	2	5
151	3	1
152	4	9
153	2	5
154	3	7
155	1	1
156	3	1
157	4	5
158	1	0
159	2	1
160	4	8
161	2	2
162	3	5
163	4	7
164	3	5
165	2	4
166	2	1
167	1	1
168	1	2
169	1	4
170	1	0
171	0	4
172	1	3
173	3	0
174	1	3
175	1	1
176	1	2
177	1	3
178	2	1
179	1	1
180	0	1
181	3	3
182	1	1
183	1	6
184	1	2
185	2	2
186	0	1
187	3	1
188	1	5
189	6	1
190	1	0
191	1	1
192	2	0
193	2	3
194	3	1
195	1	6
196	2	3
197	3	9
198	1	6
199	3	0
200	3	2
201	5	4
202	1	2
203	0	3
204	2	1
205	1	1
206	1	1
207	0	2
208	4	9
209	3	6
210	2	1
211	3	15
212	4	2
213	1	4
214	1	47
215	1	2
216	3	15
217	1	0
218	2	1
219	2	1
220	2	3
221	3	2
222	2	5
223	2	2
224	1	0
225	1	3
226	4	2
227	2	28
228	2	1
229	5	0
230	0	1
231	1	0
232	1	6
233	2	1
234	1	1
235	1	2
236	1	3
237	3	1
238	5	1
239	2	3
240	6	0
241	6	2
242	4	7
243	4	1
244	3	0
245	4	7
246	1	2
247	4	3
248	5	4
249	2	3
