# Supplementary material for: Stochastic processes constrain the within and between host evolution of influenza virus
Source: eLife journal article supplement (doi:10.7554/elife.35962), 2018-04-23
Supplement: supp [file elife-35962-supp-v1.zip › elife_poa_e35962_Figure_1_source_data_3.csv]

	vaccination_status	iSNV
1	1	1
2	1	0
3	0	2
4	0	3
5	1	3
6	1	2
7	0	1
8	0	1
9	0	0
10	1	2
11	1	3
12	0	2
13	1	3
14	0	2
15	0	1
16	0	4
17	0	1
18	1	0
19	1	1
20	1	1
21	1	3
22	1	2
23	1	3
24	1	0
25	1	6
26	1	0
27	0	0
28	0	1
29	1	5
30	1	0
31	0	0
32	1	0
33	0	0
34	1	1
35	1	0
36	1	0
37	1	7
38	1	1
39	0	2
40	0	2
41	0	1
42	1	1
43	1	2
44	1	2
45	0	1
46	1	0
47	1	2
48	1	5
49	1	1
50	1	0
51	1	2
52	1	0
53	1	0
54	1	2
55	1	1
56	1	0
57	1	1
58	1	4
59	1	1
60	1	3
61	1	0
62	0	7
63	0	1
64	1	1
65	1	1
66	1	1
67	1	1
68	0	0
69	1	57
70	1	2
71	1	0
72	0	2
73	1	1
74	1	0
75	0	2
76	0	2
77	1	0
78	0	0
79	0	2
80	0	1
81	1	1
82	1	0
83	1	2
84	1	2
85	1	5
86	1	1
87	1	3
88	1	1
89	1	2
90	1	2
91	0	2
92	0	1
93	0	2
94	1	0
95	0	22
96	1	3
97	1	9
98	1	2
99	1	3
100	1	0
101	1	2
102	0	0
103	0	1
104	1	1
105	0	3
106	0	3
107	0	6
108	1	5
109	1	1
110	1	3
111	1	2
112	0	4
113	1	6
114	0	1
115	1	4
116	1	3
117	1	3
118	0	1
119	0	5
120	1	0
121	0	3
122	0	2
123	1	5
124	0	3
125	1	5
126	1	1
127	1	2
128	1	2
129	0	4
130	1	2
131	1	2
132	0	0
133	1	0
134	1	4
135	1	5
136	0	4
137	0	3
138	1	4
139	0	1
140	0	0
141	0	1
142	0	1
143	0	4
144	0	0
145	0	0
146	1	0
147	1	0
148	1	1
149	1	2
150	0	5
151	0	1
152	0	9
153	0	5
154	0	7
155	0	1
156	0	1
157	0	5
158	1	0
159	1	1
160	0	8
161	1	2
162	0	5
163	1	7
164	0	5
165	0	4
166	0	1
167	1	1
168	1	2
169	0	4
170	1	0
171	0	4
172	0	3
173	1	0
174	1	3
175	1	1
176	0	2
177	0	3
178	0	1
179	0	1
180	0	1
181	1	3
182	1	1
183	0	6
184	0	2
185	1	2
186	0	1
187	1	1
188	1	5
189	0	1
190	0	0
191	0	1
192	1	0
193	1	3
194	0	1
195	1	6
196	1	3
197	1	9
198	1	6
199	1	0
200	1	2
201	0	4
202	0	2
203	0	3
204	1	1
205	1	1
206	1	1
207	1	2
208	0	9
209	0	6
210	0	1
211	1	15
212	0	2
213	0	4
214	1	47
215	1	2
216	0	15
217	1	0
218	1	1
219	1	1
220	0	3
221	1	2
222	1	5
223	1	2
224	1	0
225	1	3
226	1	2
227	1	28
228	1	1
229	1	0
230	1	1
231	1	0
232	0	6
233	0	1
234	1	1
235	1	2
236	0	3
237	1	1
238	1	1
239	1	3
240	0	0
241	0	2
242	1	7
243	1	1
244	1	0
245	1	7
246	1	2
247	1	3
248	1	4
249	1	3
