# Supplementary material for: Stochastic processes constrain the within and between host evolution of influenza virus
Source: eLife journal article supplement (doi:10.7554/elife.35962), 2018-04-23
Supplement: supp [file elife-35962-supp-v1.zip › elife_poa_e35962_Figure_1_source_data_4.csv]

	chr	pos	var	freq.var	class	ENROLLID	season	strain
1	PB1	486	C	0.246616109799	Synonymous	300828	2010-2011	A/H3N2
2	PB2	2107	C	0.0725844544186	Synonymous	300828	2010-2011	A/H3N2
3	NR	795	G	0.216731577373	Nonsynonymous	300557	2010-2011	A/H1N1
4	PA	1657	A	0.235674353821	Synonymous	300557	2010-2011	A/H1N1
5	HA	541	T	0.0201363418506	Synonymous	301529	2010-2011	A/H3N2
6	PA	1809	G	0.260801502818	Synonymous	301529	2010-2011	A/H3N2
7	PA	985	T	0.0444876304387	Nonsynonymous	301530	2010-2011	A/H3N2
8	PA	678	A	0.210032961793	Nonsynonymous	300341	2010-2011	A/H3N2
9	PB1	579	A	0.028264411754	Synonymous	300341	2010-2011	A/H3N2
10	HA	743	A	0.0259868546028	Synonymous	301203	2010-2011	A/H1N1
11	HA	1344	C	0.0233480001586	Synonymous	301203	2010-2011	A/H1N1
12	HA	805	C	0.0243038547044	Nonsynonymous	301203	2010-2011	A/H1N1
13	HA	410	G	0.0271934325295	Synonymous	301203	2010-2011	A/H1N1
14	NR	755	A	0.0273377618804	Synonymous	301203	2010-2011	A/H1N1
15	NR	929	C	0.0264468638427	Synonymous	301203	2010-2011	A/H1N1
16	NR	506	T	0.0249314826275	Synonymous	301203	2010-2011	A/H1N1
17	NR	860	T	0.0276120959333	Synonymous	301203	2010-2011	A/H1N1
18	PA	508	A	0.0209328463051	Synonymous	301203	2010-2011	A/H1N1
19	PA	823	A	0.0208213256484	Synonymous	301203	2010-2011	A/H1N1
20	PB1	1110	A	0.0279343449985	Synonymous	301203	2010-2011	A/H1N1
21	PB1	1569	A	0.0287075180227	Synonymous	301203	2010-2011	A/H1N1
22	PB1	1410	C	0.024641134422	Synonymous	301203	2010-2011	A/H1N1
23	PB1	1128	G	0.0257054041129	Nonsynonymous	301203	2010-2011	A/H1N1
24	PB1	1263	G	0.0249690100939	Synonymous	301203	2010-2011	A/H1N1
25	PB1	1896	G	0.0274068868587	Synonymous	301203	2010-2011	A/H1N1
26	PB1	948	T	0.0266929651545	Synonymous	301203	2010-2011	A/H1N1
27	PB2	1382	A	0.0300094966762	Nonsynonymous	301203	2010-2011	A/H1N1
28	PB2	810	C	0.0327086646843	Synonymous	301203	2010-2011	A/H1N1
29	PB2	1812	G	0.0270749856898	Synonymous	301203	2010-2011	A/H1N1
30	PB2	274	A	0.031956522331	Nonsynonymous	301203	2010-2011	A/H1N1
31	PB2	911	G	0.0296509445765	Nonsynonymous	301203	2010-2011	A/H1N1
32	HA	328	T	0.0323212529433	Synonymous	301306	2010-2011	A/H3N2
33	NP	854	C	0.0558985985952	Synonymous	301306	2010-2011	A/H3N2
34	PB1	1047	G	0.0245470163028	Synonymous	301306	2010-2011	A/H3N2
35	PA	208	A	0.0371293296785	Synonymous	300330	2010-2011	A/H1N1
36	PA	400	A	0.0265969538531	Synonymous	300330	2010-2011	A/H1N1
37	PA	472	C	0.02284082798	Synonymous	300330	2010-2011	A/H1N1
38	PA	691	C	0.0242333861497	Nonsynonymous	300330	2010-2011	A/H1N1
39	PA	1678	G	0.0236498108015	Synonymous	300330	2010-2011	A/H1N1
40	PB1	315	A	0.0274128142741	Nonsynonymous	300330	2010-2011	A/H1N1
41	PB1	495	A	0.0257560078188	Synonymous	300330	2010-2011	A/H1N1
42	PB2	594	C	0.020663744521	Synonymous	300330	2010-2011	A/H1N1
43	PB2	918	C	0.0208223762568	Synonymous	300330	2010-2011	A/H1N1
44	NP	981	A	0.2542518546	Nonsynonymous	300331	2010-2011	A/H1N1
45	PB2	918	C	0.38327738606	Synonymous	300331	2010-2011	A/H1N1
46	NP	982	C	0.196222925177	Synonymous	300332	2010-2011	A/H1N1
47	PB1	310	T	0.139806981813	Nonsynonymous	300332	2010-2011	A/H1N1
48	PB2	918	T	0.176179516686	Synonymous	300332	2010-2011	A/H1N1
49	PB1	366	A	0.0354421270571	Nonsynonymous	300671	2010-2011	A/H3N2
50	PB1	369	A	0.0262459044459	Synonymous	300671	2010-2011	A/H3N2
51	PB1	117	A	0.19627190774	Synonymous	301023	2010-2011	A/H3N2
52	PB2	958	A	0.0475402529444	Nonsynonymous	301120	2010-2011	A/H3N2
53	M	806	C	0.0970290771176	Synonymous	300293	2010-2011	A/H3N2
54	NP	1333	G	0.0396898992129	Nonsynonymous	300293	2010-2011	A/H3N2
55	NR	215	A	0.0245977092282	Nonsynonymous	300293	2010-2011	A/H3N2
56	NP	113	T	0.354978951595	Synonymous	300294	2010-2011	A/H3N2
57	NP	232	C	0.146442011944	Nonsynonymous	300294	2010-2011	A/H3N2
58	NR	1322	A	0.0982668055415	Nonsynonymous	300294	2010-2011	A/H3N2
59	NR	625	C	0.0628815205843	Synonymous	300685	2010-2011	A/H3N2
60	PA	643	C	0.0457634958178	Nonsynonymous	300685	2010-2011	A/H3N2
61	PA	1143	A	0.0676430169521	Synonymous	300685	2010-2011	A/H3N2
62	PB1	884	T	0.462330832946	Nonsynonymous	300685	2010-2011	A/H3N2
63	PB1	837	G	0.0452346180251	Synonymous	300685	2010-2011	A/H3N2
64	PB2	1693	C	0.445908697664	Synonymous	300685	2010-2011	A/H3N2
65	HA	329	A	0.0876081589394	Nonsynonymous	301355	2010-2011	A/H3N2
66	NR	1066	A	0.0472842941854	Synonymous	301355	2010-2011	A/H3N2
67	PA	255	A	0.152407651916	Synonymous	301355	2010-2011	A/H3N2
68	PA	1270	C	0.021988040817	Nonsynonymous	301355	2010-2011	A/H3N2
69	PA	1483	G	0.0593906387626	Nonsynonymous	301355	2010-2011	A/H3N2
70	NR	445	T	0.279209295612	Synonymous	301357	2010-2011	A/H3N2
71	M	449	A	0.0215886273051	Nonsynonymous	300788	2010-2011	A/H3N2
72	NP	394	T	0.0247930097303	Nonsynonymous	300788	2010-2011	A/H3N2
73	PB1	1198	T	0.0384068744759	Synonymous	300788	2010-2011	A/H3N2
74	PA	339	A	0.0636337206546	Synonymous	300688	2010-2011	A/H3N2
75	PB2	2086	A	0.0648788952013	Synonymous	300688	2010-2011	A/H3N2
76	HA	258	G	0.0712147345665	Nonsynonymous	300481	2010-2011	A/H3N2
77	M	609	T	0.0277207216477	Nonsynonymous	300481	2010-2011	A/H3N2
78	PB2	95	G	0.213763447334	Nonsynonymous	300481	2010-2011	A/H3N2
79	PB2	671	A	0.0217312190565	Nonsynonymous	300481	2010-2011	A/H3N2
80	HA	1687	A	0.0531865534785	Synonymous	300670	2010-2011	A/H3N2
81	PB1	1070	G	0.0272310881827	Nonsynonymous	300670	2010-2011	A/H3N2
82	HA	34	T	0.0349067830226	Synonymous	300670	2010-2011	A/H3N2
83	HA	54	T	0.0324267782427	Nonsynonymous	300670	2010-2011	A/H3N2
84	HA	97	T	0.0205198358413	Synonymous	300670	2010-2011	A/H3N2
85	HA	1696	G	0.0572463768116	Synonymous	300670	2010-2011	A/H3N2
86	NS	378	A	0.103556849464	Nonsynonymous	320216	2011-2012	A/H3N2
87	NS	702	A	0.0318171716218	Nonsynonymous	320015	2011-2012	A/H3N2
88	PA	1666	G	0.0561124028229	Nonsynonymous	320015	2011-2012	A/H3N2
89	PB1	2150	T	0.0351710657714	Nonsynonymous	320015	2011-2012	A/H3N2
90	PB1	2145	C	0.0394831552749	Synonymous	320015	2011-2012	A/H3N2
91	HA	963	C	0.0713594212038	Nonsynonymous	320661	2011-2012	A/H3N2
92	PB1	1319	G	0.0713055271992	Nonsynonymous	320661	2011-2012	A/H3N2
93	PB1	96	C	0.311521778326	Synonymous	320661	2011-2012	A/H3N2
94	HA	340	G	0.0366173872584	Synonymous	320110	2011-2012	A/H3N2
95	PA	1518	G	0.0218433542723	Synonymous	320110	2011-2012	A/H3N2
96	PB2	457	T	0.0705146645613	Synonymous	320110	2011-2012	A/H3N2
97	NS	193	T	0.0228194726166	Nonsynonymous	321372	2011-2012	A/H3N2
98	NP	874	G	0.0263243796573	Nonsynonymous	320645	2011-2012	A/H3N2
99	NR	828	T	0.1374755843	Nonsynonymous	320645	2011-2012	A/H3N2
100	NR	394	C	0.269357311637	Synonymous	320645	2011-2012	A/H3N2
101	PB1	1902	T	0.130753164782	Synonymous	320645	2011-2012	A/H3N2
102	PB2	1069	A	0.0451717869948	Synonymous	320645	2011-2012	A/H3N2
103	NP	1080	T	0.39862280632	Synonymous	330450	2012-2013	A/H3N2
104	PB1	202	A	0.0554474734595	Nonsynonymous	330450	2012-2013	A/H3N2
105	PB2	1151	A	0.027683456668	Nonsynonymous	330450	2012-2013	A/H3N2
106	M	829	C	0.0407135684986	Nonsynonymous	330452	2012-2013	A/H3N2
107	PA	1956	G	0.0286907350199	Synonymous	330452	2012-2013	A/H3N2
108	HA	620	A	0.0545129347005	Synonymous	330744	2012-2013	A/H3N2
109	NP	1032	A	0.0208290604618	Synonymous	330744	2012-2013	A/H3N2
110	NP	858	A	0.021110853089	Synonymous	330744	2012-2013	A/H3N2
111	NS	298	A	0.0220027324236	Nonsynonymous	330744	2012-2013	A/H3N2
112	PB2	491	A	0.0220088076053	Nonsynonymous	330744	2012-2013	A/H3N2
113	NP	513	G	0.131570120259	Synonymous	331138	2012-2013	A/H3N2
114	PB1	2059	G	0.0395966651629	Synonymous	331138	2012-2013	A/H3N2
115	PB2	356	T	0.075784198047	Nonsynonymous	331138	2012-2013	A/H3N2
116	HA	718	C	0.0656507501752	Nonsynonymous	331045	2012-2013	A/H3N2
117	M	340	A	0.0664192162413	Synonymous	331045	2012-2013	A/H3N2
118	PB1	2020	T	0.0776507282654	Synonymous	331045	2012-2013	A/H3N2
119	PB2	1029	T	0.388947486198	Synonymous	331045	2012-2013	A/H3N2
120	PB2	933	A	0.130760323231	Synonymous	331045	2012-2013	A/H3N2
121	M	745	C	0.0453972017464	Nonsynonymous	330589	2012-2013	A/H3N2
122	PB1	1039	G	0.0277401796526	Synonymous	330601	2012-2013	A/H3N2
123	PB1	202	A	0.0272726139943	Nonsynonymous	330601	2012-2013	A/H3N2
124	NS	389	A	0.0203411919089	Synonymous	330307	2012-2013	A/H3N2
125	PA	1260	A	0.170059845479	Synonymous	330307	2012-2013	A/H3N2
126	NS	223	G	0.0545076961188	Nonsynonymous	331482	2012-2013	A/H3N2
127	PA	1410	G	0.029367207057	Synonymous	331482	2012-2013	A/H3N2
128	PA	1485	A	0.0353808757904	Synonymous	331482	2012-2013	A/H3N2
129	PB2	258	G	0.062342469415	Synonymous	331482	2012-2013	A/H3N2
130	NP	927	G	0.0701674064932	Synonymous	330243	2012-2013	A/H3N2
131	PB2	2065	A	0.303361436034	Nonsynonymous	330243	2012-2013	A/H3N2
132	NR	924	C	0.0868832554919	Nonsynonymous	330035	2012-2013	A/H3N2
133	PA	418	A	0.0958916318536	Nonsynonymous	330035	2012-2013	A/H3N2
134	NP	1344	A	0.244784202836	Synonymous	330441	2012-2013	A/H3N2
135	PB1	2180	A	0.190678829115	Nonsynonymous	330441	2012-2013	A/H3N2
136	PB1	907	A	0.0221180140336	Synonymous	330441	2012-2013	A/H3N2
137	PB2	987	T	0.28281320686	Synonymous	330441	2012-2013	A/H3N2
138	NR	834	T	0.030090113646	Nonsynonymous	331061	2012-2013	A/H3N2
139	NR	925	A	0.0435569743186	Synonymous	331061	2012-2013	A/H3N2
140	NS	672	T	0.0498535396754	Nonsynonymous	331061	2012-2013	A/H3N2
141	NS	314	A	0.0204055618074	Synonymous	331061	2012-2013	A/H3N2
142	PB1	844	C	0.0617749564066	Synonymous	331061	2012-2013	A/H3N2
143	M	872	G	0.101614792518	Synonymous	330949	2012-2013	A/H3N2
144	NS	422	T	0.34605197662	Synonymous	330949	2012-2013	A/H3N2
145	PB1	664	A	0.106284627112	Synonymous	330949	2012-2013	A/H3N2
146	PB2	2054	C	0.302309628122	Nonsynonymous	330949	2012-2013	A/H3N2
147	NR	317	T	0.419608128249	Nonsynonymous	330693	2012-2013	A/H3N2
148	PA	1344	A	0.0844702156738	Nonsynonymous	330693	2012-2013	A/H3N2
149	PB1	373	A	0.360019406276	Synonymous	330693	2012-2013	A/H3N2
150	HA	416	A	0.0205402513684	Synonymous	330640	2012-2013	A/H1N1
151	HA	616	A	0.0242143471711	Nonsynonymous	330640	2012-2013	A/H1N1
152	NR	470	A	0.139544527767	Synonymous	330640	2012-2013	A/H1N1
153	PB2	435	A	0.119662758721	Synonymous	330640	2012-2013	A/H1N1
154	PB2	1056	A	0.0221236194405	Synonymous	331433	2012-2013	A/H3N2
155	PA	228	A	0.0262613709044	Nonsynonymous	330897	2012-2013	A/H3N2
156	PB1	417	A	0.244005981958	Nonsynonymous	330133	2012-2013	A/H3N2
157	HA	1599	G	0.0796845583444	Nonsynonymous	331541	2012-2013	A/H3N2
158	HA	428	A	0.477021548965	Synonymous	331541	2012-2013	A/H3N2
159	NS	442	C	0.0374924853707	Nonsynonymous	331541	2012-2013	A/H3N2
160	PA	208	G	0.0735383217207	Nonsynonymous	331541	2012-2013	A/H3N2
161	PA	676	C	0.498412133084	Nonsynonymous	UM41554	2013-2014	A/H1N1
162	HA	455	A	0.218282664535	Synonymous	UM41553	2013-2014	A/H1N1
163	PA	1699	A	0.0255279958275	Synonymous	UM41553	2013-2014	A/H1N1
164	HA	685	A	0.0207233615604	Nonsynonymous	UM40738	2013-2014	A/H1N1
165	HA	1232	C	0.0212453126065	Synonymous	UM40738	2013-2014	A/H1N1
166	NR	930	A	0.0353751330272	Nonsynonymous	UM40738	2013-2014	A/H1N1
167	PA	1086	A	0.238777977329	Nonsynonymous	UM40738	2013-2014	A/H1N1
168	PB1	1920	A	0.0237125072561	Synonymous	UM40738	2013-2014	A/H1N1
169	PB2	1683	T	0.0252684980888	Synonymous	UM40621	2013-2014	A/H1N1
170	HA	536	G	0.028391127633	Synonymous	UM41567	2013-2014	A/H1N1
171	HA	1316	T	0.0306509478189	Synonymous	UM41567	2013-2014	A/H1N1
172	HA	1485	A	0.0325716598595	Nonsynonymous	UM41567	2013-2014	A/H1N1
173	NR	359	G	0.0518027083309	Nonsynonymous	UM41567	2013-2014	A/H1N1
174	NS	566	G	0.0699333197701	Nonsynonymous	UM41567	2013-2014	A/H1N1
175	NS	326	A	0.0231739146169	Nonsynonymous	UM41567	2013-2014	A/H1N1
176	PA	810	A	0.192440757349	Nonsynonymous	UM41567	2013-2014	A/H1N1
177	PA	1162	C	0.03369515877	Synonymous	UM41567	2013-2014	A/H1N1
178	PB2	565	A	0.0350703336268	Nonsynonymous	UM41567	2013-2014	A/H1N1
179	NP	1080	G	0.0380514567403	Synonymous	UM40366	2013-2014	A/H1N1
180	NR	702	A	0.108950494341	Nonsynonymous	UM40366	2013-2014	A/H1N1
181	PB1	1362	G	0.0563314134083	Nonsynonymous	UM40366	2013-2014	A/H1N1
182	PB2	2136	G	0.157204737224	Synonymous	UM40366	2013-2014	A/H1N1
183	PB2	835	A	0.0973151005194	Nonsynonymous	UM40366	2013-2014	A/H1N1
184	NP	670	A	0.246005816304	Synonymous	UM40367	2013-2014	A/H1N1
185	NR	748	A	0.211680740638	Nonsynonymous	UM40367	2013-2014	A/H1N1
186	PA	1845	C	0.0314569095185	Nonsynonymous	UM40367	2013-2014	A/H1N1
187	PA	1598	A	0.0258732858116	Nonsynonymous	UM40367	2013-2014	A/H1N1
188	PA	1102	A	0.0209369116314	Synonymous	UM40367	2013-2014	A/H1N1
189	PA	1747	T	0.0236694209846	Nonsynonymous	UM40367	2013-2014	A/H1N1
190	PA	876	T	0.0501793281846	Nonsynonymous	UM40367	2013-2014	A/H1N1
191	HA	89	C	0.0333888290793	Synonymous	UM40457	2013-2014	A/H1N1
192	PA	640	T	0.0277332266909	Nonsynonymous	UM40460	2013-2014	A/H1N1
193	NP	624	A	0.0824032360295	Synonymous	UM40699	2013-2014	A/H1N1
194	NR	398	G	0.173189936681	Synonymous	UM40699	2013-2014	A/H1N1
195	NR	1261	C	0.0235687982028	Nonsynonymous	UM40699	2013-2014	A/H1N1
196	PA	688	C	0.0695095518927	Nonsynonymous	UM40699	2013-2014	A/H1N1
197	PB2	1212	C	0.175265834009	Synonymous	UM40699	2013-2014	A/H1N1
198	PB1	1708	A	0.101981451696	Nonsynonymous	UM40292	2013-2014	A/H1N1
199	HA	1553	G	0.0337601146114	Synonymous	UM40066	2013-2014	A/H1N1
200	HA	467	G	0.0212436250676	Synonymous	UM40066	2013-2014	A/H1N1
201	M	602	G	0.102863325958	Nonsynonymous	UM40066	2013-2014	A/H1N1
202	NR	745	T	0.0231639302468	Nonsynonymous	UM40066	2013-2014	A/H1N1
203	PA	1441	T	0.0627244752125	Synonymous	UM40066	2013-2014	A/H1N1
204	PA	1195	A	0.0354238122577	Synonymous	UM40066	2013-2014	A/H1N1
205	PB1	953	G	0.0210163276048	Nonsynonymous	UM40066	2013-2014	A/H1N1
206	PB1	376	T	0.139184276728	Synonymous	UM40066	2013-2014	A/H1N1
207	PA	1936	A	0.0302867619845	Synonymous	UM40093	2013-2014	A/H1N1
208	PB2	678	T	0.0233398308714	Synonymous	UM40093	2013-2014	A/H1N1
209	NR	1347	A	0.0318366404581	Nonsynonymous	UM40095	2013-2014	A/H1N1
210	PA	1225	A	0.038668870637	Synonymous	UM40095	2013-2014	A/H1N1
211	PA	1852	A	0.0220598891279	Synonymous	UM40095	2013-2014	A/H1N1
212	PA	1588	C	0.131114783888	Synonymous	UM40095	2013-2014	A/H1N1
213	PB2	1650	A	0.0379162603346	Synonymous	UM40095	2013-2014	A/H1N1
214	HA	650	A	0.0242193827197	Synonymous	UM41510	2013-2014	A/H1N1
215	NR	506	C	0.0280651375576	Synonymous	UM41510	2013-2014	A/H1N1
216	PA	342	G	0.0295447927408	Nonsynonymous	UM41510	2013-2014	A/H1N1
217	PA	1150	C	0.0254233348291	Synonymous	UM41510	2013-2014	A/H1N1
218	PB1	904	G	0.0692716158236	Nonsynonymous	UM41510	2013-2014	A/H1N1
219	PB1	1707	T	0.0531150684198	Synonymous	UM41510	2013-2014	A/H1N1
220	PB1	1737	A	0.118328348245	Synonymous	UM41510	2013-2014	A/H1N1
221	HA	1372	A	0.0245594206298	Nonsynonymous	UM40062	2013-2014	A/H1N1
222	NP	1394	G	0.359219995046	Nonsynonymous	UM40062	2013-2014	A/H1N1
223	PA	1789	A	0.0220761369764	Nonsynonymous	UM40062	2013-2014	A/H1N1
224	PB1	681	G	0.0261638334021	Synonymous	UM40062	2013-2014	A/H1N1
225	PB1	596	C	0.175549705351	Nonsynonymous	UM40062	2013-2014	A/H1N1
226	NR	251	T	0.317325154365	Synonymous	UM41576	2013-2014	A/H1N1
227	NS	762	C	0.0296057975035	Synonymous	UM41576	2013-2014	A/H1N1
228	PA	1088	G	0.0413805167407	Nonsynonymous	UM41576	2013-2014	A/H1N1
229	PA	1583	T	0.0360010657287	Nonsynonymous	UM41576	2013-2014	A/H1N1
230	PB2	646	T	0.0343496123313	Synonymous	UM41577	2013-2014	A/H1N1
231	M	148	T	0.0549448265274	Synonymous	UM40439	2013-2014	A/H1N1
232	NS	277	A	0.145769379088	Nonsynonymous	UM40300	2013-2014	A/H1N1
233	PB1	1941	T	0.0510901022574	Synonymous	UM40300	2013-2014	A/H1N1
234	NR	1125	G	0.0315136960125	Nonsynonymous	UM40530	2013-2014	A/H1N1
235	NR	670	C	0.0404574503889	Nonsynonymous	UM40530	2013-2014	A/H1N1
236	NS	646	A	0.0508126294312	Nonsynonymous	UM40530	2013-2014	A/H1N1
237	PB2	1902	C	0.0294655169752	Synonymous	UM40530	2013-2014	A/H1N1
238	NP	339	G	0.0406848015183	Synonymous	50628	2014-2015	A/H3N2
239	M	693	A	0.0612145506589	Nonsynonymous	50169	2014-2015	A/H3N2
240	NR	1217	A	0.41648219594	Nonsynonymous	50169	2014-2015	A/H3N2
241	HA	995	T	0.0380427122411	Synonymous	50553	2014-2015	A/H3N2
242	NP	723	C	0.0353873297077	Synonymous	50553	2014-2015	A/H3N2
243	PB1	1822	A	0.0374481830523	Synonymous	50553	2014-2015	A/H3N2
244	HA	948	A	0.048947720117	Nonsynonymous	50482	2014-2015	A/H3N2
245	NP	273	C	0.0732036364348	Synonymous	50482	2014-2015	A/H3N2
246	PB2	2055	C	0.0575796758126	Synonymous	50482	2014-2015	A/H3N2
247	HA	801	T	0.163602839312	Nonsynonymous	50630	2014-2015	A/H3N2
248	HA	393	A	0.0665395939678	Nonsynonymous	50630	2014-2015	A/H3N2
249	PA	1701	A	0.230503852869	Synonymous	50620	2014-2015	A/H3N2
250	PA	1701	A	0.0395296954463	Synonymous	50619	2014-2015	A/H3N2
251	HA	140	G	0.0264987958706	Synonymous	50319	2014-2015	A/H3N2
252	PB2	880	T	0.0360841803356	Nonsynonymous	50319	2014-2015	A/H3N2
253	PB1	877	G	0.0208654028168	Synonymous	50318	2014-2015	A/H3N2
254	PB1	985	C	0.0579359438968	Synonymous	50318	2014-2015	A/H3N2
255	NP	207	G	0.023682486193	Synonymous	50318	2014-2015	A/H3N2
256	HA	1670	A	0.0289438607466	Synonymous	50207	2014-2015	A/H3N2
257	PB2	1893	T	0.0552275151719	Synonymous	50207	2014-2015	A/H3N2
258	NR	258	G	0.0314763480283	Nonsynonymous	50832	2014-2015	A/H3N2
259	PB1	1852	A	0.0426954659953	Synonymous	50832	2014-2015	A/H3N2
260	PB1	1465	C	0.154494567149	Synonymous	50832	2014-2015	A/H3N2
261	PA	1251	A	0.0315564391805	Synonymous	50429	2014-2015	A/H3N2
262	PB2	1122	A	0.0287860652909	Nonsynonymous	50429	2014-2015	A/H3N2
263	PA	1999	A	0.0530355210076	Nonsynonymous	50307	2014-2015	A/H3N2
264	NP	1156	G	0.0249595090652	Nonsynonymous	50769	2014-2015	A/H3N2
265	NS	746	C	0.0524560047733	Nonsynonymous	50769	2014-2015	A/H3N2
266	PB2	1008	A	0.0313836052341	Synonymous	50769	2014-2015	A/H3N2
267	PB2	1279	T	0.127244790023	Synonymous	50769	2014-2015	A/H3N2
268	PA	519	G	0.0259055480325	Synonymous	50969	2014-2015	A/H3N2
269	PA	1599	C	0.0403366319175	Synonymous	51105	2014-2015	A/H3N2
270	PA	1866	C	0.166390797917	Nonsynonymous	51416	2014-2015	A/H3N2
271	NR	604	A	0.0289683696738	Synonymous	50316	2014-2015	A/H3N2
272	NS	327	G	0.0244745265716	Nonsynonymous	50316	2014-2015	A/H3N2
273	PA	272	A	0.0766430907023	Nonsynonymous	50316	2014-2015	A/H3N2
274	PB1	1877	A	0.0541025374848	Synonymous	50830	2014-2015	A/H3N2
275	PB2	2186	G	0.334157944814	Nonsynonymous	50830	2014-2015	A/H3N2
276	HA	236	A	0.0251913260241	Nonsynonymous	50141	2014-2015	A/H3N2
277	HA	1011	G	0.0234583211453	Nonsynonymous	50141	2014-2015	A/H3N2
278	NS	652	G	0.0205565019974	Nonsynonymous	50141	2014-2015	A/H3N2
279	HA	1486	T	0.103900854115	Nonsynonymous	50874	2014-2015	A/H3N2
280	NR	501	G	0.0331706001001	Nonsynonymous	50874	2014-2015	A/H3N2
281	PB1	1705	G	0.296343011523	Synonymous	50874	2014-2015	A/H3N2
282	PB1	1798	G	0.178816730614	Synonymous	50874	2014-2015	A/H3N2
283	PB1	530	A	0.25351760292	Nonsynonymous	50874	2014-2015	A/H3N2
284	PB2	212	A	0.302404459968	Nonsynonymous	50874	2014-2015	A/H3N2
285	NS	631	A	0.0211238416806	Nonsynonymous	50428	2014-2015	A/H3N2
286	HA	524	C	0.0588456364788	Synonymous	51438	2014-2015	A/H3N2
287	HA	638	A	0.213904415309	Synonymous	51438	2014-2015	A/H3N2
288	NS	538	C	0.0487008376097	Nonsynonymous	51438	2014-2015	A/H3N2
289	PA	927	T	0.0922304890917	Synonymous	51438	2014-2015	A/H3N2
290	PB1	430	A	0.220772809253	Synonymous	51438	2014-2015	A/H3N2
291	HA	879	C	0.0341160572648	Nonsynonymous	50968	2014-2015	A/H3N2
292	NR	168	C	0.0532737376178	Nonsynonymous	50538	2014-2015	A/H3N2
293	NR	174	C	0.0495013829969	Nonsynonymous	50538	2014-2015	A/H3N2
294	NR	204	C	0.0537203647876	Nonsynonymous	50538	2014-2015	A/H3N2
295	NR	220	C	0.0457585470085	Synonymous	50538	2014-2015	A/H3N2
296	NR	221	C	0.0490578075375	Synonymous	50538	2014-2015	A/H3N2
297	NR	249	C	0.0589176907983	Nonsynonymous	50538	2014-2015	A/H3N2
298	NS	169	C	0.399660203475	Nonsynonymous	50538	2014-2015	A/H3N2
299	HA	545	T	0.0680510202664	Synonymous	50540	2014-2015	A/H3N2
300	PB1	338	A	0.0257358112459	Nonsynonymous	50230	2014-2015	A/H3N2
301	PB2	1728	C	0.0726294582509	Synonymous	50230	2014-2015	A/H3N2
302	HA	273	T	0.0511608590998	Synonymous	50305	2014-2015	A/H3N2
303	NP	1011	A	0.272598938811	Synonymous	50305	2014-2015	A/H3N2
304	NP	1334	T	0.0293693096763	Nonsynonymous	50331	2014-2015	A/H3N2
305	NP	942	A	0.208095813744	Synonymous	51046	2014-2015	A/H3N2
306	HA	802	C	0.0280369911772	Nonsynonymous	51132	2014-2015	A/H3N2
307	PA	326	G	0.0370992588179	Nonsynonymous	51132	2014-2015	A/H3N2
308	PB1	1204	G	0.0245627983103	Synonymous	50812	2014-2015	A/H3N2
309	PB1	463	T	0.0868394479973	Synonymous	50812	2014-2015	A/H3N2
310	NS	468	A	0.0619220607662	Synonymous	51336	2014-2015	A/H3N2
311	HA	644	T	0.0378270981645	Nonsynonymous	51220	2014-2015	A/H3N2
312	NR	517	T	0.0600349668329	Synonymous	51220	2014-2015	A/H3N2
313	HA	1381	A	0.350987594845	Nonsynonymous	50677	2014-2015	A/H3N2
314	M	525	T	0.0457074637956	Nonsynonymous	50677	2014-2015	A/H3N2
315	NR	192	T	0.358102059087	Nonsynonymous	50677	2014-2015	A/H3N2
316	PA	774	A	0.352988441807	Nonsynonymous	50677	2014-2015	A/H3N2
317	PB2	1112	G	0.0277712434047	Nonsynonymous	50677	2014-2015	A/H3N2
318	PB1	582	A	0.142027819958	Nonsynonymous	51096	2014-2015	A/H3N2
319	NP	1132	G	0.308590466108	Nonsynonymous	50120	2014-2015	A/H3N2
320	PB2	2113	G	0.32950278905	Nonsynonymous	50120	2014-2015	A/H3N2
321	HA	1071	C	0.1771161047	Nonsynonymous	51054	2014-2015	A/H3N2
322	M	349	A	0.328564855482	Synonymous	51054	2014-2015	A/H3N2
323	NS	453	G	0.147829492147	Nonsynonymous	51055	2014-2015	A/H3N2
324	PA	1065	C	0.0233691677076	Synonymous	51000	2014-2015	A/H3N2
325	NP	300	A	0.05031166427	Synonymous	51097	2014-2015	A/H3N2
326	NP	1276	G	0.0248815074902	Nonsynonymous	51097	2014-2015	A/H3N2
327	NR	700	A	0.0282006488645	Synonymous	51097	2014-2015	A/H3N2
328	PA	2052	G	0.044689039701	Synonymous	51097	2014-2015	A/H3N2
329	PB1	910	A	0.340472493385	Synonymous	51073	2014-2015	A/H3N2
330	PA	1117	T	0.0788221743703	Synonymous	50558	2014-2015	A/H3N2
331	PB1	200	T	0.0424511804139	Nonsynonymous	50558	2014-2015	A/H3N2
332	PB2	2097	T	0.0394071034315	Synonymous	50558	2014-2015	A/H3N2
333	NS	441	A	0.0227637263668	Nonsynonymous	51101	2014-2015	A/H3N2
334	NS	729	G	0.471282989773	Synonymous	51101	2014-2015	A/H3N2
335	PA	258	T	0.457058670595	Synonymous	51101	2014-2015	A/H3N2
336	PB1	1621	G	0.0356033123119	Nonsynonymous	51101	2014-2015	A/H3N2
337	PB2	484	A	0.0380963841513	Nonsynonymous	51101	2014-2015	A/H3N2
338	PB2	528	C	0.0223344929805	Synonymous	51101	2014-2015	A/H3N2
339	PA	1467	A	0.46149376175	Synonymous	51101	2014-2015	A/H3N2
340	HA	1019	A	0.0451690779046	Synonymous	50468	2014-2015	A/H3N2
341	NS	687	A	0.0681319007211	Nonsynonymous	50842	2014-2015	A/H3N2
342	PB1	1391	G	0.322934269415	Nonsynonymous	51057	2014-2015	A/H3N2
343	M	376	T	0.0241204928038	Synonymous	51058	2014-2015	A/H3N2
344	M	553	A	0.0897057347185	Synonymous	51059	2014-2015	A/H3N2
345	NR	1099	C	0.0364039850796	Synonymous	50418	2014-2015	A/H3N2
346	PB1	1900	A	0.0282897855058	Synonymous	50418	2014-2015	A/H3N2
347	M	910	G	0.199797392055	Nonsynonymous	51138	2014-2015	A/H3N2
348	NP	638	G	0.0444150083966	Nonsynonymous	51138	2014-2015	A/H3N2
349	NS	685	A	0.0824818441073	Nonsynonymous	51137	2014-2015	A/H3N2
350	NR	156	T	0.128879091063	Nonsynonymous	50466	2014-2015	A/H3N2
351	PB2	193	T	0.0521057992736	Nonsynonymous	50466	2014-2015	A/H3N2
352	PA	1519	C	0.0453344686054	Synonymous	50467	2014-2015	A/H3N2
353	PB2	1728	C	0.0983232879322	Synonymous	50467	2014-2015	A/H3N2
354	PA	292	A	0.088459720965	Nonsynonymous	50001	2014-2015	A/H3N2
355	PB2	1099	A	0.0999685429417	Nonsynonymous	50001	2014-2015	A/H3N2
356	PB2	2211	G	0.0491766129568	Synonymous	50004	2014-2015	A/H3N2
357	HA	491	C	0.287317227262	Synonymous	50167	2014-2015	A/H3N2
358	PA	1614	C	0.0942974892991	Nonsynonymous	51322	2014-2015	A/H3N2
359	PA	532	G	0.13470617541	Nonsynonymous	51322	2014-2015	A/H3N2
360	NP	912	T	0.0238459160993	Synonymous	50246	2014-2015	A/H3N2
361	PB1	1381	C	0.220612391464	Synonymous	50246	2014-2015	A/H3N2
362	HA	418	T	0.0315552982759	Nonsynonymous	50993	2014-2015	A/H3N2
363	M	303	C	0.0309374082531	Nonsynonymous	50993	2014-2015	A/H3N2
364	PA	1795	G	0.102067566964	Nonsynonymous	50993	2014-2015	A/H3N2
365	PB1	1558	T	0.0243697569459	Synonymous	50993	2014-2015	A/H3N2
366	PB2	1099	A	0.0383825176499	Nonsynonymous	50993	2014-2015	A/H3N2
367	PB1	1741	A	0.0267897579618	Synonymous	50727	2014-2015	A/H3N2
368	PA	916	A	0.0475818807204	Nonsynonymous	50143	2014-2015	A/H3N2
369	PB2	1085	A	0.0371576898886	Nonsynonymous	50143	2014-2015	A/H3N2
370	HA	997	G	0.118965758211	Nonsynonymous	50143	2014-2015	A/H3N2
371	PB2	446	G	0.0982688776826	Nonsynonymous	50910	2014-2015	A/H3N2
372	NP	923	G	0.0404271939275	Nonsynonymous	50552	2014-2015	A/H3N2
373	NR	866	A	0.0393442047164	Synonymous	50552	2014-2015	A/H3N2
374	PA	1978	T	0.0214917213397	Nonsynonymous	50552	2014-2015	A/H3N2
375	PB1	2089	A	0.0291516541107	Synonymous	50552	2014-2015	A/H3N2
376	HA	995	T	0.087795844906	Synonymous	50553	2014-2015	A/H3N2
377	NP	723	C	0.0536324531095	Synonymous	50553	2014-2015	A/H3N2
378	PB1	1822	A	0.0208268208572	Synonymous	50553	2014-2015	A/H3N2
379	HA	1424	A	0.0201012039784	Synonymous	50551	2014-2015	A/H3N2
380	HA	665	A	0.270574997689	Synonymous	50551	2014-2015	A/H3N2
381	PA	2079	G	0.273918168363	Synonymous	50551	2014-2015	A/H3N2
382	NP	273	C	0.0351737311541	Synonymous	50482	2014-2015	A/H3N2
383	PB2	1147	T	0.156554027081	Synonymous	50206	2014-2015	A/H3N2
384	NP	495	G	0.243959588583	Synonymous	50206	2014-2015	A/H3N2
385	M	677	A	0.116986427518	Nonsynonymous	50168	2014-2015	A/H3N2
386	PA	1728	G	0.0487704192997	Synonymous	50168	2014-2015	A/H3N2
387	PB1	1652	T	0.160855955857	Nonsynonymous	50168	2014-2015	A/H3N2
388	PA	1701	G	0.475973745988	Synonymous	50620	2014-2015	A/H3N2
389	PA	1701	G	0.0333324322132	Synonymous	50618	2014-2015	A/H3N2
390	PA	1701	A	0.0461136587657	Synonymous	50619	2014-2015	A/H3N2
391	HA	1463	A	0.0439763850454	Nonsynonymous	50318	2014-2015	A/H3N2
392	NP	1362	T	0.0412810234528	Synonymous	50318	2014-2015	A/H3N2
393	PB2	1713	C	0.0315621488869	Synonymous	50318	2014-2015	A/H3N2
394	HA	140	G	0.0498634992657	Synonymous	50319	2014-2015	A/H3N2
395	HA	1670	A	0.0349313418453	Synonymous	50207	2014-2015	A/H3N2
396	PA	1175	A	0.0230061114999	Nonsynonymous	50207	2014-2015	A/H3N2
397	PB1	1108	T	0.0409793687369	Synonymous	50207	2014-2015	A/H3N2
398	PB1	1213	T	0.022613500316	Synonymous	50207	2014-2015	A/H3N2
399	PB2	587	G	0.0286562213244	Nonsynonymous	50207	2014-2015	A/H3N2
400	PB2	897	T	0.0293899721004	Synonymous	50207	2014-2015	A/H3N2
401	PA	1202	G	0.029538641251	Nonsynonymous	50969	2014-2015	A/H3N2
402	PA	1201	A	0.0250320272215	Nonsynonymous	50969	2014-2015	A/H3N2
403	HA	1025	A	0.0247380531631	Synonymous	50141	2014-2015	A/H3N2
404	HA	564	A	0.0321867371234	Nonsynonymous	50141	2014-2015	A/H3N2
405	HA	1512	A	0.111588923505	Nonsynonymous	50171	2014-2015	A/H3N2
406	HA	1049	G	0.0914239163906	Synonymous	50678	2014-2015	A/H3N2
407	NR	501	G	0.467637282551	Nonsynonymous	50874	2014-2015	A/H3N2
408	PB1	1705	G	0.461350779373	Synonymous	50874	2014-2015	A/H3N2
409	PB1	1798	G	0.443234092666	Synonymous	50874	2014-2015	A/H3N2
410	PB1	530	A	0.473359560691	Nonsynonymous	50874	2014-2015	A/H3N2
411	PB2	212	A	0.470121801684	Nonsynonymous	50874	2014-2015	A/H3N2
412	NP	306	G	0.0262084144851	Synonymous	51359	2014-2015	A/H3N2
413	NR	449	T	0.0267244631601	Nonsynonymous	50007	2014-2015	A/H3N2
414	HA	1046	G	0.0231050462443	Synonymous	50330	2014-2015	A/H3N2
415	M	655	G	0.063670939569	Synonymous	50330	2014-2015	A/H3N2
416	NS	244	A	0.0289458761766	Nonsynonymous	50330	2014-2015	A/H3N2
417	HA	655	C	0.174562543218	Nonsynonymous	50935	2014-2015	A/H3N2
418	HA	524	C	0.489384735077	Synonymous	51438	2014-2015	A/H3N2
419	HA	638	A	0.0359769154235	Synonymous	51438	2014-2015	A/H3N2
420	NP	914	G	0.0432845476875	Nonsynonymous	51438	2014-2015	A/H3N2
421	NS	538	C	0.48757896261	Nonsynonymous	51438	2014-2015	A/H3N2
422	PA	927	T	0.0779471069765	Synonymous	51438	2014-2015	A/H3N2
423	PB1	430	A	0.0396486125248	Synonymous	51438	2014-2015	A/H3N2
424	PA	984	C	0.0217852295444	Synonymous	50968	2014-2015	A/H3N2
425	PB1	577	G	0.0827635346589	Synonymous	50968	2014-2015	A/H3N2
426	PB2	1785	A	0.0318535602867	Synonymous	50968	2014-2015	A/H3N2
427	HA	459	G	0.110522479152	Nonsynonymous	51106	2014-2015	A/H3N2
428	NP	1407	A	0.0432148926624	Synonymous	51106	2014-2015	A/H3N2
429	NP	735	T	0.0429205601746	Synonymous	51106	2014-2015	A/H3N2
430	NR	452	C	0.024604648721	Nonsynonymous	51106	2014-2015	A/H3N2
431	NS	140	G	0.0329920540903	Synonymous	51106	2014-2015	A/H3N2
432	NS	233	G	0.0322513524761	Synonymous	51106	2014-2015	A/H3N2
433	NS	173	A	0.0310390335634	Synonymous	51106	2014-2015	A/H3N2
434	PB1	1109	C	0.0268645421677	Synonymous	51106	2014-2015	A/H3N2
435	PB1	650	A	0.029230595902	Nonsynonymous	51106	2014-2015	A/H3N2
436	NR	174	C	0.103353285093	Nonsynonymous	50538	2014-2015	A/H3N2
437	NR	204	C	0.105418555052	Nonsynonymous	50538	2014-2015	A/H3N2
438	NR	220	C	0.0944041703999	Synonymous	50538	2014-2015	A/H3N2
439	NR	221	C	0.1011110223	Synonymous	50538	2014-2015	A/H3N2
440	NR	249	C	0.104666794699	Nonsynonymous	50538	2014-2015	A/H3N2
441	NS	169	C	0.382374742032	Nonsynonymous	50538	2014-2015	A/H3N2
442	HA	545	T	0.18189226088	Synonymous	50540	2014-2015	A/H3N2
443	PA	348	A	0.0300537980878	Synonymous	50540	2014-2015	A/H3N2
444	NP	1011	C	0.321690423285	Synonymous	50305	2014-2015	A/H3N2
445	NP	402	T	0.0537544777979	Synonymous	50305	2014-2015	A/H3N2
446	NR	250	G	0.271666666667	Nonsynonymous	50305	2014-2015	A/H3N2
447	NS	77	C	0.0201493318979	Synonymous	50305	2014-2015	A/H3N2
448	NP	1334	T	0.0545497547818	Nonsynonymous	50331	2014-2015	A/H3N2
449	PA	384	G	0.0517465143171	Synonymous	50331	2014-2015	A/H3N2
450	M	916	C	0.0249870756505	Nonsynonymous	50399	2014-2015	A/H3N2
451	PA	459	T	0.0681411797764	Synonymous	50399	2014-2015	A/H3N2
452	PA	1059	G	0.0273408828772	Synonymous	50399	2014-2015	A/H3N2
453	NP	942	A	0.0977810655399	Synonymous	51046	2014-2015	A/H3N2
454	PB1	463	T	0.0748051062923	Synonymous	50812	2014-2015	A/H3N2
455	PB1	778	T	0.0220178065715	Synonymous	50786	2014-2015	A/H3N2
456	HA	862	A	0.0301231869331	Nonsynonymous	51273	2014-2015	A/H3N2
457	PB1	677	A	0.028997307956	Nonsynonymous	51273	2014-2015	A/H3N2
458	HA	1178	A	0.0413910882347	Synonymous	51041	2014-2015	A/H3N2
459	HA	1475	C	0.0417286269701	Synonymous	51041	2014-2015	A/H3N2
460	M	484	A	0.0209838939155	Synonymous	51041	2014-2015	A/H3N2
461	NP	108	C	0.0358219006488	Synonymous	51041	2014-2015	A/H3N2
462	PA	201	G	0.0276076825647	Synonymous	51041	2014-2015	A/H3N2
463	PB2	1015	C	0.0451564601606	Nonsynonymous	51041	2014-2015	A/H3N2
464	PB2	1911	G	0.0269257841865	Synonymous	51041	2014-2015	A/H3N2
465	PB2	2187	G	0.385372324046	Synonymous	51041	2014-2015	A/H3N2
466	M	214	T	0.129615827631	Synonymous	51041	2014-2015	A/H3N2
467	HA	1433	A	0.167855170801	Synonymous	51043	2014-2015	A/H3N2
468	M	379	C	0.0505068125595	Synonymous	51043	2014-2015	A/H3N2
469	NR	487	A	0.0756390477738	Synonymous	51043	2014-2015	A/H3N2
470	NS	233	A	0.020260001288	Synonymous	51043	2014-2015	A/H3N2
471	PB1	281	T	0.216517063177	Synonymous	51043	2014-2015	A/H3N2
472	PB2	1258	G	0.235793987068	Nonsynonymous	51043	2014-2015	A/H3N2
473	NS	468	C	0.497550142941	Synonymous	51335	2014-2015	A/H3N2
474	M	721	C	0.0755530848731	Synonymous	50232	2014-2015	A/H3N2
475	NS	140	A	0.0764177797241	Synonymous	50232	2014-2015	A/H3N2
476	NS	173	T	0.0802175390891	Synonymous	50232	2014-2015	A/H3N2
477	NS	440	G	0.0241244183161	Nonsynonymous	50232	2014-2015	A/H3N2
478	PA	1605	A	0.0262236164834	Synonymous	50232	2014-2015	A/H3N2
479	PA	180	C	0.0230176211454	Synonymous	50232	2014-2015	A/H3N2
480	PA	552	A	0.0224108822864	Synonymous	50232	2014-2015	A/H3N2
481	PA	807	G	0.0241789623989	Synonymous	50232	2014-2015	A/H3N2
482	PA	1014	C	0.0235300535364	Synonymous	50232	2014-2015	A/H3N2
483	PB1	884	A	0.0219176859209	Nonsynonymous	50232	2014-2015	A/H3N2
484	PB1	1030	C	0.0220879913451	Synonymous	50232	2014-2015	A/H3N2
485	PB1	1345	T	0.0621787009043	Synonymous	50232	2014-2015	A/H3N2
486	PB1	1820	C	0.0222056107642	Synonymous	50232	2014-2015	A/H3N2
487	PB1	538	A	0.0223448876923	Nonsynonymous	50232	2014-2015	A/H3N2
488	PB1	650	G	0.0261827823349	Nonsynonymous	50232	2014-2015	A/H3N2
489	M	464	G	0.38548294533	Nonsynonymous	50332	2014-2015	A/H3N2
490	NS	553	T	0.0213012737322	Nonsynonymous	50332	2014-2015	A/H3N2
491	NS	136	A	0.0268568997688	Nonsynonymous	50921	2014-2015	A/H3N2
492	PA	773	G	0.105173460212	Nonsynonymous	50921	2014-2015	A/H3N2
493	PB1	1954	C	0.0721176516153	Nonsynonymous	50921	2014-2015	A/H3N2
494	PB2	954	T	0.493070050931	Synonymous	50921	2014-2015	A/H3N2
495	PB2	2113	G	0.333314318553	Nonsynonymous	50120	2014-2015	A/H3N2
496	NP	1132	G	0.330987717503	Nonsynonymous	50120	2014-2015	A/H3N2
497	PB1	1009	A	0.0452488687783	Nonsynonymous	50161	2014-2015	A/H3N2
498	PB1	1276	A	0.048480463097	Synonymous	50161	2014-2015	A/H3N2
499	PB1	1348	A	0.0513803680982	Synonymous	50161	2014-2015	A/H3N2
500	PB1	820	A	0.0433937823834	Synonymous	50161	2014-2015	A/H3N2
501	PB1	1067	C	0.046817849305	Synonymous	50161	2014-2015	A/H3N2
502	PB1	163	C	0.0203045685279	Nonsynonymous	50161	2014-2015	A/H3N2
503	PB1	1173	G	0.0527704485488	Nonsynonymous	50161	2014-2015	A/H3N2
504	PB1	205	G	0.0537313432836	Nonsynonymous	50161	2014-2015	A/H3N2
505	PB1	421	G	0.0534296028881	Synonymous	50161	2014-2015	A/H3N2
506	PB1	811	G	0.0480519480519	Synonymous	50161	2014-2015	A/H3N2
507	PB1	832	G	0.0430868167203	Synonymous	50161	2014-2015	A/H3N2
508	PB2	1842	T	0.495237882416	Synonymous	50161	2014-2015	A/H3N2
509	PB2	414	C	0.0355140186916	Synonymous	50161	2014-2015	A/H3N2
510	PB2	642	T	0.487383776923	Synonymous	50161	2014-2015	A/H3N2
511	PB2	666	G	0.051	Synonymous	50161	2014-2015	A/H3N2
512	NS	287	A	0.037064665189	Synonymous	50785	2014-2015	A/H3N2
513	NP	295	G	0.0282610972159	Nonsynonymous	50809	2014-2015	A/H3N2
514	NR	248	G	0.0978330437963	Nonsynonymous	50197	2014-2015	A/H3N2
515	PB1	557	G	0.0692931663872	Nonsynonymous	50197	2014-2015	A/H3N2
516	PB2	1691	A	0.0217924923698	Nonsynonymous	50197	2014-2015	A/H3N2
517	M	292	A	0.0518150335153	Nonsynonymous	50852	2014-2015	A/H3N2
518	PB1	1713	C	0.152585429812	Nonsynonymous	50852	2014-2015	A/H3N2
519	HA	1274	T	0.0449178280835	Synonymous	51055	2014-2015	A/H3N2
520	M	559	A	0.0312107008117	Synonymous	51055	2014-2015	A/H3N2
521	M	214	C	0.418167542072	Synonymous	51055	2014-2015	A/H3N2
522	PB2	1626	A	0.0817615627157	Synonymous	51055	2014-2015	A/H3N2
523	PB2	2007	A	0.0345706494099	Synonymous	51055	2014-2015	A/H3N2
524	HA	1526	A	0.0414573346808	Nonsynonymous	51000	2014-2015	A/H3N2
525	NR	959	C	0.0397616975701	Nonsynonymous	51000	2014-2015	A/H3N2
526	NP	300	A	0.0270648583852	Synonymous	51097	2014-2015	A/H3N2
527	NR	700	A	0.0378279094117	Synonymous	51097	2014-2015	A/H3N2
528	PA	2052	G	0.0455709195935	Synonymous	51097	2014-2015	A/H3N2
529	PA	1117	T	0.0827123981284	Synonymous	50556	2014-2015	A/H3N2
530	PB2	2097	T	0.0367014627226	Synonymous	50556	2014-2015	A/H3N2
531	PB1	910	A	0.0421432505725	Synonymous	51073	2014-2015	A/H3N2
532	PA	1776	C	0.0464083544798	Synonymous	51162	2014-2015	A/H3N2
533	NS	441	A	0.0214906940287	Nonsynonymous	51101	2014-2015	A/H3N2
534	NS	729	G	0.458902519072	Synonymous	51101	2014-2015	A/H3N2
535	PA	258	T	0.434210292636	Synonymous	51101	2014-2015	A/H3N2
536	PB1	1621	G	0.0289830648868	Nonsynonymous	51101	2014-2015	A/H3N2
537	PB2	484	A	0.0436740299109	Nonsynonymous	51101	2014-2015	A/H3N2
538	PA	1467	A	0.448453608247	Synonymous	51101	2014-2015	A/H3N2
539	PB2	1617	C	0.0238997683461	Synonymous	50468	2014-2015	A/H3N2
540	NS	687	A	0.0292183267245	Nonsynonymous	50842	2014-2015	A/H3N2
541	M	553	A	0.0328200308996	Synonymous	51059	2014-2015	A/H3N2
542	PA	1611	A	0.0514282128035	Synonymous	51059	2014-2015	A/H3N2
543	NS	459	A	0.181633983951	Nonsynonymous	51267	2014-2015	A/H3N2
544	PA	759	T	0.138142807168	Nonsynonymous	51267	2014-2015	A/H3N2
545	PB2	192	C	0.241822113436	Synonymous	51267	2014-2015	A/H3N2
546	PB1	811	G	0.167685255921	Synonymous	50288	2014-2015	A/H3N2
547	HA	332	T	0.131046393517	Synonymous	50323	2014-2015	A/H3N2
548	NR	1099	C	0.0305729417429	Synonymous	50418	2014-2015	A/H3N2
549	PB1	1837	C	0.0305646799297	Synonymous	50418	2014-2015	A/H3N2
550	PB2	2245	A	0.0510015862057	Nonsynonymous	50418	2014-2015	A/H3N2
551	PA	1848	A	0.12118464793	Synonymous	50003	2014-2015	A/H3N2
552	PB1	1852	A	0.0428052289357	Synonymous	50003	2014-2015	A/H3N2
553	HA	891	T	0.0749459857027	Nonsynonymous	50068	2014-2015	A/H3N2
554	M	612	A	0.0498870864871	Nonsynonymous	50068	2014-2015	A/H3N2
555	NP	1093	G	0.19787873158	Nonsynonymous	50068	2014-2015	A/H3N2
556	PA	1183	C	0.284998499176	Nonsynonymous	50068	2014-2015	A/H3N2
557	PB1	589	C	0.173931693828	Synonymous	50068	2014-2015	A/H3N2
558	PB2	1461	G	0.0410748179371	Nonsynonymous	50068	2014-2015	A/H3N2
559	PB2	1779	T	0.0225214862375	Synonymous	50068	2014-2015	A/H3N2
560	PA	1551	C	0.0244930994171	Synonymous	50167	2014-2015	A/H3N2
561	HA	866	C	0.055754576684	Synonymous	50246	2014-2015	A/H3N2
562	NR	1011	T	0.0406584010261	Nonsynonymous	50246	2014-2015	A/H3N2
563	PA	346	C	0.0548465106995	Synonymous	50246	2014-2015	A/H3N2
564	PA	363	A	0.0568473674904	Synonymous	50246	2014-2015	A/H3N2
565	PB1	1381	C	0.278668534015	Synonymous	50246	2014-2015	A/H3N2
566	PB2	1353	A	0.0462796586636	Synonymous	50246	2014-2015	A/H3N2
567	M	755	A	0.449394396216	Nonsynonymous	50246	2014-2015	A/H3N2
568	PB1	1741	A	0.0245798938441	Synonymous	50727	2014-2015	A/H3N2
569	PB1	571	C	0.0259449381869	Synonymous	50727	2014-2015	A/H3N2
570	PA	603	T	0.0575332766257	Nonsynonymous	50992	2014-2015	A/H3N2
571	PB1	1357	C	0.0588249709766	Synonymous	50992	2014-2015	A/H3N2
572	PB2	286	A	0.0511922627981	Nonsynonymous	50992	2014-2015	A/H3N2
573	NR	604	A	0.0211669597951	Synonymous	50993	2014-2015	A/H3N2
574	NS	441	A	0.0272112598053	Nonsynonymous	50993	2014-2015	A/H3N2
575	PB1	2104	T	0.0437288398798	Synonymous	50993	2014-2015	A/H3N2
576	PB2	872	T	0.0289518870615	Nonsynonymous	50993	2014-2015	A/H3N2
577	HA	997	G	0.160588985754	Nonsynonymous	50143	2014-2015	A/H3N2
578	PA	916	A	0.0365481131744	Nonsynonymous	50143	2014-2015	A/H3N2
579	PB2	1085	A	0.0598420993163	Nonsynonymous	50143	2014-2015	A/H3N2
