# Supplementary material for: Stochastic processes constrain the within and between host evolution of influenza virus
Source: eLife journal article supplement (doi:10.7554/elife.35962), 2018-04-23
Supplement: supp [file elife-35962-supp-v1.zip › elife_poa_e35962_Figure_2_figure_supplement_1.pdf]

Figure 2-figure supplement 1

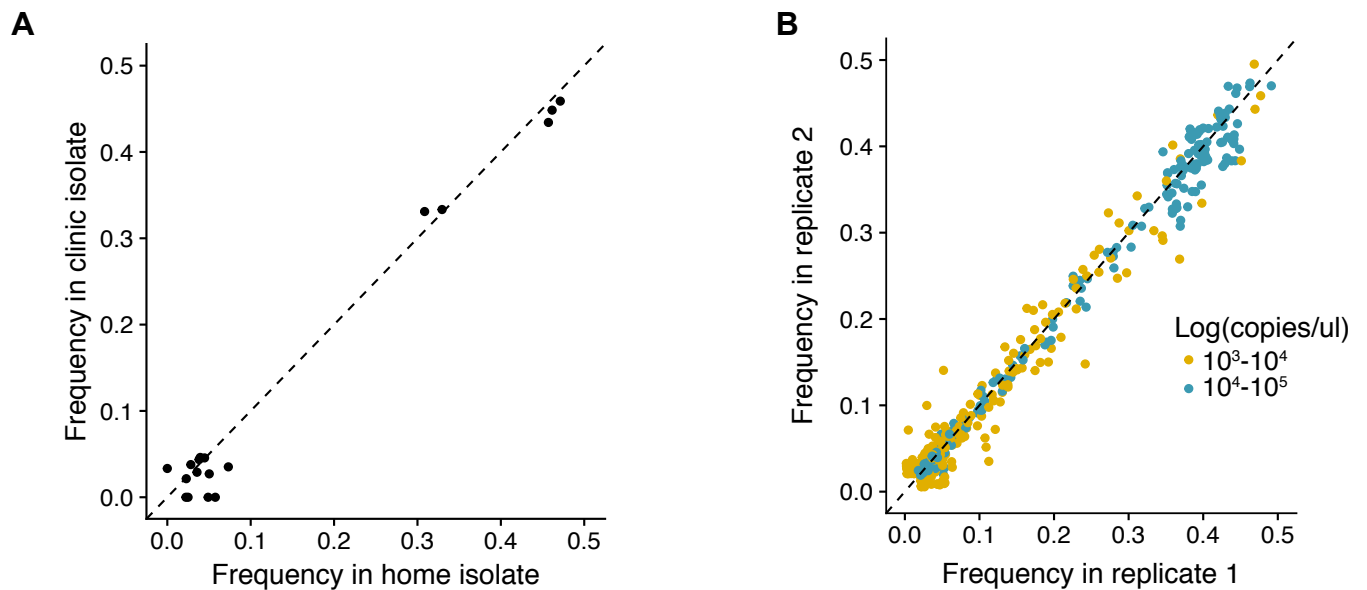

Figure 2-figure supplement 1. (A) Reproducibility of iSNV identification for paired samples acquired on the same day. The x-axis represents iSNV frequencies found in the home-acquired nasal swab. The y-axis represents iSNV frequencies found the clinic-acquired combined throat and nasal swab. Dashed line is a one to one expectation. (B) Frequency of all minority iSNV as determined from replicate RT-PCR and sequencing libraries (see methods). Data are stratified by viral load of original samples. Note that samples with viral loads  $>10^5$  were not run in duplicate and those with viral loads  $<10^3$  were not used in the study. Dashed line is a one to one expectation.
