# Supplementary material for: Stochastic processes constrain the within and between host evolution of influenza virus
Source: eLife journal article supplement (doi:10.7554/elife.35962), 2018-04-23
Supplement: supp [file elife-35962-supp-v1.zip › elife_poa_e35962_Figure_2_source_data_1.csv]

	SPECID	chr	pos	freq.var	class_factor
1	M53302	PB1	486	0.246616109799	Synonymous
2	M53302	PB2	2107	0.0725844544186	Synonymous
3	M53523	NR	795	0.216731577373	Nonsynonymous
4	M53523	PA	1657	0.235674353821	Synonymous
5	M53671	HA	541	0.0201363418506	Synonymous
6	M53671	PA	1809	0.260801502818	Synonymous
7	M53672	PA	985	0.0444876304387	Nonsynonymous
8	M53769	PA	678	0.210032961793	Nonsynonymous
9	M53769	PB1	579	0.028264411754	Synonymous
10	M54062	HA	743	0.0259868546028	Synonymous
11	M54062	HA	1344	0.0233480001586	Synonymous
12	M54062	HA	805	0.0243038547044	Nonsynonymous
13	M54062	HA	410	0.0271934325295	Synonymous
14	M54062	NR	755	0.0273377618804	Synonymous
15	M54062	NR	929	0.0264468638427	Synonymous
16	M54062	NR	506	0.0249314826275	Synonymous
17	M54062	NR	860	0.0276120959333	Synonymous
18	M54062	PA	508	0.0209328463051	Synonymous
19	M54062	PA	823	0.0208213256484	Synonymous
20	M54062	PB1	1110	0.0279343449985	Synonymous
21	M54062	PB1	1569	0.0287075180227	Synonymous
22	M54062	PB1	1410	0.024641134422	Synonymous
23	M54062	PB1	1128	0.0257054041129	Nonsynonymous
24	M54062	PB1	1263	0.0249690100939	Synonymous
25	M54062	PB1	1896	0.0274068868587	Synonymous
26	M54062	PB1	948	0.0266929651545	Synonymous
27	M54062	PB2	1382	0.0300094966762	Nonsynonymous
28	M54062	PB2	810	0.0327086646843	Synonymous
29	M54062	PB2	1812	0.0270749856898	Synonymous
30	M54062	PB2	274	0.031956522331	Nonsynonymous
31	M54062	PB2	911	0.0296509445765	Nonsynonymous
32	M54181	HA	328	0.0323212529433	Synonymous
33	M54181	NP	854	0.0558985985952	Synonymous
34	M54181	PB1	1047	0.0245470163028	Synonymous
35	M54205	PA	208	0.0371293296785	Synonymous
36	M54205	PA	400	0.0265969538531	Synonymous
37	M54205	PA	472	0.02284082798	Synonymous
38	M54205	PA	691	0.0242333861497	Nonsynonymous
39	M54205	PA	1678	0.0236498108015	Synonymous
40	M54205	PB1	315	0.0274128142741	Nonsynonymous
41	M54205	PB1	495	0.0257560078188	Synonymous
42	M54205	PB2	594	0.020663744521	Synonymous
43	M54205	PB2	918	0.0208223762568	Synonymous
44	M54206	NP	981	0.2542518546	Nonsynonymous
45	M54206	PB2	918	0.38327738606	Synonymous
46	M54207	NP	982	0.196222925177	Synonymous
47	M54207	PB1	310	0.139806981813	Nonsynonymous
48	M54207	PB2	918	0.176179516686	Synonymous
49	M54369	PB1	366	0.0354421270571	Nonsynonymous
50	M54369	PB1	369	0.0262459044459	Synonymous
51	M54375	PB1	117	0.19627190774	Synonymous
52	M54580	PB2	958	0.0475402529444	Nonsynonymous
53	M54585	M	806	0.0970290771176	Synonymous
54	M54585	NP	1333	0.0396898992129	Nonsynonymous
55	M54585	NR	215	0.0245977092282	Nonsynonymous
56	M54586	NP	113	0.354978951595	Synonymous
57	M54586	NP	232	0.146442011944	Nonsynonymous
58	M54586	NR	1322	0.0982668055415	Nonsynonymous
59	M54659	NR	625	0.0628815205843	Synonymous
60	M54659	PA	643	0.0457634958178	Nonsynonymous
61	M54659	PA	1143	0.0676430169521	Synonymous
62	M54659	PB1	884	0.462330832946	Nonsynonymous
63	M54659	PB1	837	0.0452346180251	Synonymous
64	M54659	PB2	1693	0.445908697664	Synonymous
65	M54724	HA	329	0.0876081589394	Nonsynonymous
66	M54724	NR	1066	0.0472842941854	Synonymous
67	M54724	PA	255	0.152407651916	Synonymous
68	M54724	PA	1270	0.021988040817	Nonsynonymous
69	M54724	PA	1483	0.0593906387626	Nonsynonymous
70	M54726	NR	445	0.279209295612	Synonymous
71	M54791	M	449	0.0215886273051	Nonsynonymous
72	M54791	NP	394	0.0247930097303	Nonsynonymous
73	M54791	PB1	1198	0.0384068744759	Synonymous
74	M54805	PA	339	0.0636337206546	Synonymous
75	M54805	PB2	2086	0.0648788952013	Synonymous
76	M54913	HA	258	0.0712147345665	Nonsynonymous
77	M54913	M	609	0.0277207216477	Nonsynonymous
78	M54913	PB2	95	0.213763447334	Nonsynonymous
79	M54913	PB2	671	0.0217312190565	Nonsynonymous
80	M55001	HA	1687	0.0531865534785	Synonymous
81	M55001	PB1	1070	0.0272310881827	Nonsynonymous
82	M55001	HA	34	0.0349067830226	Synonymous
83	M55001	HA	54	0.0324267782427	Nonsynonymous
84	M55001	HA	97	0.0205198358413	Synonymous
85	M55001	HA	1696	0.0572463768116	Synonymous
86	MH0495	NS	378	0.103556849464	Nonsynonymous
87	MH0728	NS	702	0.0318171716218	Nonsynonymous
88	MH0728	PA	1666	0.0561124028229	Nonsynonymous
89	MH0728	PB1	2150	0.0351710657714	Nonsynonymous
90	MH0728	PB1	2145	0.0394831552749	Synonymous
91	MH0778	HA	963	0.0713594212038	Nonsynonymous
92	MH0778	PB1	1319	0.0713055271992	Nonsynonymous
93	MH0778	PB1	96	0.311521778326	Synonymous
94	MH0922	HA	340	0.0366173872584	Synonymous
95	MH0922	PA	1518	0.0218433542723	Synonymous
96	MH0922	PB2	457	0.0705146645613	Synonymous
97	MH1205	NS	193	0.0228194726166	Nonsynonymous
98	MH1346	NP	874	0.0263243796573	Nonsynonymous
99	MH1346	NR	828	0.1374755843	Nonsynonymous
100	MH1346	NR	394	0.269357311637	Synonymous
101	MH1346	PB1	1902	0.130753164782	Synonymous
102	MH1346	PB2	1069	0.0451717869948	Synonymous
103	MH2362	NP	1080	0.39862280632	Synonymous
104	MH2362	PB1	202	0.0554474734595	Nonsynonymous
105	MH2362	PB2	1151	0.027683456668	Nonsynonymous
106	MH2364	M	829	0.0407135684986	Nonsynonymous
107	MH2364	PA	1956	0.0286907350199	Synonymous
108	MH2365	HA	620	0.0545129347005	Synonymous
109	MH2365	NP	1032	0.0208290604618	Synonymous
110	MH2365	NP	858	0.021110853089	Synonymous
111	MH2365	NS	298	0.0220027324236	Nonsynonymous
112	MH2365	PB2	491	0.0220088076053	Nonsynonymous
113	MH2382	NP	513	0.131570120259	Synonymous
114	MH2382	PB1	2059	0.0395966651629	Synonymous
115	MH2382	PB2	356	0.075784198047	Nonsynonymous
116	MH2436	HA	718	0.0656507501752	Nonsynonymous
117	MH2436	M	340	0.0664192162413	Synonymous
118	MH2436	PB1	2020	0.0776507282654	Synonymous
119	MH2436	PB2	1029	0.388947486198	Synonymous
120	MH2436	PB2	933	0.130760323231	Synonymous
121	MH2447	M	745	0.0453972017464	Nonsynonymous
122	MH2448	PB1	1039	0.0277401796526	Synonymous
123	MH2448	PB1	202	0.0272726139943	Nonsynonymous
124	MH2466	NS	389	0.0203411919089	Synonymous
125	MH2466	PA	1260	0.170059845479	Synonymous
126	MH2497	NS	223	0.0545076961188	Nonsynonymous
127	MH2497	PA	1410	0.029367207057	Synonymous
128	MH2497	PA	1485	0.0353808757904	Synonymous
129	MH2497	PB2	258	0.062342469415	Synonymous
130	MH2516	NP	927	0.0701674064932	Synonymous
131	MH2516	PB2	2065	0.303361436034	Nonsynonymous
132	MH2527	NR	924	0.0868832554919	Nonsynonymous
133	MH2527	PA	418	0.0958916318536	Nonsynonymous
134	MH2706	NP	1344	0.244784202836	Synonymous
135	MH2706	PB1	2180	0.190678829115	Nonsynonymous
136	MH2706	PB1	907	0.0221180140336	Synonymous
137	MH2706	PB2	987	0.28281320686	Synonymous
138	MH2737	NR	834	0.030090113646	Nonsynonymous
139	MH2737	NR	925	0.0435569743186	Synonymous
140	MH2737	NS	672	0.0498535396754	Nonsynonymous
141	MH2737	NS	314	0.0204055618074	Synonymous
142	MH2737	PB1	844	0.0617749564066	Synonymous
143	MH2810	M	872	0.101614792518	Synonymous
144	MH2810	NS	422	0.34605197662	Synonymous
145	MH2810	PB1	664	0.106284627112	Synonymous
146	MH2810	PB2	2054	0.302309628122	Nonsynonymous
147	MH2863	NR	317	0.419608128249	Nonsynonymous
148	MH2863	PA	1344	0.0844702156738	Nonsynonymous
149	MH2863	PB1	373	0.360019406276	Synonymous
150	MH2936	HA	416	0.0205402513684	Synonymous
151	MH2936	HA	616	0.0242143471711	Nonsynonymous
152	MH2936	NR	470	0.139544527767	Synonymous
153	MH2936	PB2	435	0.119662758721	Synonymous
154	MH2942	PB2	1056	0.0221236194405	Synonymous
155	MH3208	PA	228	0.0262613709044	Nonsynonymous
156	MH3270	PB1	417	0.244005981958	Nonsynonymous
157	MH4091	HA	1599	0.0796845583444	Nonsynonymous
158	MH4091	HA	428	0.477021548965	Synonymous
159	MH4091	NS	442	0.0374924853707	Nonsynonymous
160	MH4091	PA	208	0.0735383217207	Nonsynonymous
161	MH5295	PA	676	0.498412133084	Nonsynonymous
162	MH5300	HA	455	0.218282664535	Synonymous
163	MH5300	PA	1699	0.0255279958275	Synonymous
164	MH5405	HA	685	0.0207233615604	Nonsynonymous
165	MH5405	HA	1232	0.0212453126065	Synonymous
166	MH5405	NR	930	0.0353751330272	Nonsynonymous
167	MH5405	PA	1086	0.238777977329	Nonsynonymous
168	MH5405	PB1	1920	0.0237125072561	Synonymous
169	MH5499	PB2	1683	0.0252684980888	Synonymous
170	MH5546	HA	536	0.028391127633	Synonymous
171	MH5546	HA	1316	0.0306509478189	Synonymous
172	MH5546	HA	1485	0.0325716598595	Nonsynonymous
173	MH5546	NR	359	0.0518027083309	Nonsynonymous
174	MH5546	NS	566	0.0699333197701	Nonsynonymous
175	MH5546	NS	326	0.0231739146169	Nonsynonymous
176	MH5546	PA	810	0.192440757349	Nonsynonymous
177	MH5546	PA	1162	0.03369515877	Synonymous
178	MH5546	PB2	565	0.0350703336268	Nonsynonymous
179	MH5548	NP	1080	0.0380514567403	Synonymous
180	MH5548	NR	702	0.108950494341	Nonsynonymous
181	MH5548	PB1	1362	0.0563314134083	Nonsynonymous
182	MH5548	PB2	2136	0.157204737224	Synonymous
183	MH5548	PB2	835	0.0973151005194	Nonsynonymous
184	MH5549	NP	670	0.246005816304	Synonymous
185	MH5549	NR	748	0.211680740638	Nonsynonymous
186	MH5549	PA	1845	0.0314569095185	Nonsynonymous
187	MH5549	PA	1598	0.0258732858116	Nonsynonymous
188	MH5549	PA	1102	0.0209369116314	Synonymous
189	MH5549	PA	1747	0.0236694209846	Nonsynonymous
190	MH5549	PA	876	0.0501793281846	Nonsynonymous
191	MH5645	HA	89	0.0333888290793	Synonymous
192	MH5646	PA	640	0.0277332266909	Nonsynonymous
193	MH5651	NP	624	0.0824032360295	Synonymous
194	MH5651	NR	398	0.173189936681	Synonymous
195	MH5651	NR	1261	0.0235687982028	Nonsynonymous
196	MH5651	PA	688	0.0695095518927	Nonsynonymous
197	MH5651	PB2	1212	0.175265834009	Synonymous
198	MH5677	PB1	1708	0.101981451696	Nonsynonymous
199	MH5679	HA	1553	0.0337601146114	Synonymous
200	MH5679	HA	467	0.0212436250676	Synonymous
201	MH5679	M	602	0.102863325958	Nonsynonymous
202	MH5679	NR	745	0.0231639302468	Nonsynonymous
203	MH5679	PA	1441	0.0627244752125	Synonymous
204	MH5679	PA	1195	0.0354238122577	Synonymous
205	MH5679	PB1	953	0.0210163276048	Nonsynonymous
206	MH5679	PB1	376	0.139184276728	Synonymous
207	MH5680	PA	1936	0.0302867619845	Synonymous
208	MH5680	PB2	678	0.0233398308714	Synonymous
209	MH5709	NR	1347	0.0318366404581	Nonsynonymous
210	MH5709	PA	1225	0.038668870637	Synonymous
211	MH5709	PA	1852	0.0220598891279	Synonymous
212	MH5709	PA	1588	0.131114783888	Synonymous
213	MH5709	PB2	1650	0.0379162603346	Synonymous
214	MH5712	HA	650	0.0242193827197	Synonymous
215	MH5712	NR	506	0.0280651375576	Synonymous
216	MH5712	PA	342	0.0295447927408	Nonsynonymous
217	MH5712	PA	1150	0.0254233348291	Synonymous
218	MH5712	PB1	904	0.0692716158236	Nonsynonymous
219	MH5712	PB1	1707	0.0531150684198	Synonymous
220	MH5712	PB1	1737	0.118328348245	Synonymous
221	MH5817	HA	1372	0.0245594206298	Nonsynonymous
222	MH5817	NP	1394	0.359219995046	Nonsynonymous
223	MH5817	PA	1789	0.0220761369764	Nonsynonymous
224	MH5817	PB1	681	0.0261638334021	Synonymous
225	MH5817	PB1	596	0.175549705351	Nonsynonymous
226	MH5848	NR	251	0.317325154365	Synonymous
227	MH5848	NS	762	0.0296057975035	Synonymous
228	MH5848	PA	1088	0.0413805167407	Nonsynonymous
229	MH5848	PA	1583	0.0360010657287	Nonsynonymous
230	MH5849	PB2	646	0.0343496123313	Synonymous
231	MH6042	M	148	0.0549448265274	Synonymous
232	MH6260	NS	277	0.145769379088	Nonsynonymous
233	MH6260	PB1	1941	0.0510901022574	Synonymous
234	MH6262	NR	1125	0.0315136960125	Nonsynonymous
235	MH6262	NR	670	0.0404574503889	Nonsynonymous
236	MH6262	NS	646	0.0508126294312	Nonsynonymous
237	MH6262	PB2	1902	0.0294655169752	Synonymous
238	HS1250	NP	339	0.0406848015183	Synonymous
239	HS1255	M	693	0.0612145506589	Nonsynonymous
240	HS1255	NR	1217	0.41648219594	Nonsynonymous
241	HS1256	HA	995	0.0380427122411	Synonymous
242	HS1256	NP	723	0.0353873297077	Synonymous
243	HS1256	PB1	1822	0.0374481830523	Synonymous
244	HS1284	HA	948	0.048947720117	Nonsynonymous
245	HS1284	NP	273	0.0732036364348	Synonymous
246	HS1284	PB2	2055	0.0575796758126	Synonymous
247	HS1294	HA	801	0.163602839312	Nonsynonymous
248	HS1294	HA	393	0.0665395939678	Nonsynonymous
249	HS1313	PA	1701	0.230503852869	Synonymous
250	HS1327	PA	1701	0.0395296954463	Synonymous
251	HS1335	HA	140	0.0264987958706	Synonymous
252	HS1335	PB2	880	0.0360841803356	Nonsynonymous
253	HS1336	PB1	877	0.0208654028168	Synonymous
254	HS1336	PB1	985	0.0579359438968	Synonymous
255	HS1336	NP	207	0.023682486193	Synonymous
256	HS1340	HA	1670	0.0289438607466	Synonymous
257	HS1340	PB2	1893	0.0552275151719	Synonymous
258	HS1341	NR	258	0.0314763480283	Nonsynonymous
259	HS1341	PB1	1852	0.0426954659953	Synonymous
260	HS1341	PB1	1465	0.154494567149	Synonymous
261	HS1342	PA	1251	0.0315564391805	Synonymous
262	HS1342	PB2	1122	0.0287860652909	Nonsynonymous
263	HS1345	PA	1999	0.0530355210076	Nonsynonymous
264	HS1349	NP	1156	0.0249595090652	Nonsynonymous
265	HS1349	NS	746	0.0524560047733	Nonsynonymous
266	HS1349	PB2	1008	0.0313836052341	Synonymous
267	HS1349	PB2	1279	0.127244790023	Synonymous
268	HS1351	PA	519	0.0259055480325	Synonymous
269	HS1364	PA	1599	0.0403366319175	Synonymous
270	HS1367	PA	1866	0.166390797917	Nonsynonymous
271	HS1369	NR	604	0.0289683696738	Synonymous
272	HS1369	NS	327	0.0244745265716	Nonsynonymous
273	HS1369	PA	272	0.0766430907023	Nonsynonymous
274	HS1375	PB1	1877	0.0541025374848	Synonymous
275	HS1375	PB2	2186	0.334157944814	Nonsynonymous
276	HS1376	HA	236	0.0251913260241	Nonsynonymous
277	HS1376	HA	1011	0.0234583211453	Nonsynonymous
278	HS1376	NS	652	0.0205565019974	Nonsynonymous
279	HS1381	HA	1486	0.103900854115	Nonsynonymous
280	HS1381	NR	501	0.0331706001001	Nonsynonymous
281	HS1381	PB1	1705	0.296343011523	Synonymous
282	HS1381	PB1	1798	0.178816730614	Synonymous
283	HS1381	PB1	530	0.25351760292	Nonsynonymous
284	HS1381	PB2	212	0.302404459968	Nonsynonymous
285	HS1388	NS	631	0.0211238416806	Nonsynonymous
286	HS1390	HA	524	0.0588456364788	Synonymous
287	HS1390	HA	638	0.213904415309	Synonymous
288	HS1390	NS	538	0.0487008376097	Nonsynonymous
289	HS1390	PA	927	0.0922304890917	Synonymous
290	HS1390	PB1	430	0.220772809253	Synonymous
291	HS1401	HA	879	0.0341160572648	Nonsynonymous
292	HS1408	NR	168	0.0532737376178	Nonsynonymous
293	HS1408	NR	174	0.0495013829969	Nonsynonymous
294	HS1408	NR	204	0.0537203647876	Nonsynonymous
295	HS1408	NR	220	0.0457585470085	Synonymous
296	HS1408	NR	221	0.0490578075375	Synonymous
297	HS1408	NR	249	0.0589176907983	Nonsynonymous
298	HS1408	NS	169	0.399660203475	Nonsynonymous
299	HS1409	HA	545	0.0680510202664	Synonymous
300	HS1413	PB1	338	0.0257358112459	Nonsynonymous
301	HS1413	PB2	1728	0.0726294582509	Synonymous
302	HS1416	HA	273	0.0511608590998	Synonymous
303	HS1416	NP	1011	0.272598938811	Synonymous
304	HS1417	NP	1334	0.0293693096763	Nonsynonymous
305	HS1421	NP	942	0.208095813744	Synonymous
306	HS1425	HA	802	0.0280369911772	Nonsynonymous
307	HS1425	PA	326	0.0370992588179	Nonsynonymous
308	HS1427	PB1	1204	0.0245627983103	Synonymous
309	HS1427	PB1	463	0.0868394479973	Synonymous
310	HS1445	NS	468	0.0619220607662	Synonymous
311	HS1450	HA	644	0.0378270981645	Nonsynonymous
312	HS1450	NR	517	0.0600349668329	Synonymous
313	HS1455	HA	1381	0.350987594845	Nonsynonymous
314	HS1455	M	525	0.0457074637956	Nonsynonymous
315	HS1455	NR	192	0.358102059087	Nonsynonymous
316	HS1455	PA	774	0.352988441807	Nonsynonymous
317	HS1455	PB2	1112	0.0277712434047	Nonsynonymous
318	HS1457	PB1	582	0.142027819958	Nonsynonymous
319	HS1461	NP	1132	0.308590466108	Nonsynonymous
320	HS1461	PB2	2113	0.32950278905	Nonsynonymous
321	HS1473	HA	1071	0.1771161047	Nonsynonymous
322	HS1473	M	349	0.328564855482	Synonymous
323	HS1474	NS	453	0.147829492147	Nonsynonymous
324	HS1487	PA	1065	0.0233691677076	Synonymous
325	HS1500	NP	300	0.05031166427	Synonymous
326	HS1500	NP	1276	0.0248815074902	Nonsynonymous
327	HS1500	NR	700	0.0282006488645	Synonymous
328	HS1500	PA	2052	0.044689039701	Synonymous
329	HS1505	PB1	910	0.340472493385	Synonymous
330	HS1507	PA	1117	0.0788221743703	Synonymous
331	HS1507	PB1	200	0.0424511804139	Nonsynonymous
332	HS1507	PB2	2097	0.0394071034315	Synonymous
333	HS1510	NS	441	0.0227637263668	Nonsynonymous
334	HS1510	NS	729	0.471282989773	Synonymous
335	HS1510	PA	258	0.457058670595	Synonymous
336	HS1510	PB1	1621	0.0356033123119	Nonsynonymous
337	HS1510	PB2	484	0.0380963841513	Nonsynonymous
338	HS1510	PB2	528	0.0223344929805	Synonymous
339	HS1510	PA	1467	0.46149376175	Synonymous
340	HS1516	HA	1019	0.0451690779046	Synonymous
341	HS1517	NS	687	0.0681319007211	Nonsynonymous
342	HS1518	PB1	1391	0.322934269415	Nonsynonymous
343	HS1519	M	376	0.0241204928038	Synonymous
344	HS1520	M	553	0.0897057347185	Synonymous
345	HS1531	NR	1099	0.0364039850796	Synonymous
346	HS1531	PB1	1900	0.0282897855058	Synonymous
347	HS1535	M	910	0.199797392055	Nonsynonymous
348	HS1535	NP	638	0.0444150083966	Nonsynonymous
349	HS1536	NS	685	0.0824818441073	Nonsynonymous
350	HS1543	NR	156	0.128879091063	Nonsynonymous
351	HS1543	PB2	193	0.0521057992736	Nonsynonymous
352	HS1544	PA	1519	0.0453344686054	Synonymous
353	HS1544	PB2	1728	0.0983232879322	Synonymous
354	HS1563	PA	292	0.088459720965	Nonsynonymous
355	HS1563	PB2	1099	0.0999685429417	Nonsynonymous
356	HS1564	PB2	2211	0.0491766129568	Synonymous
357	HS1566	HA	491	0.287317227262	Synonymous
358	HS1573	PA	1614	0.0942974892991	Nonsynonymous
359	HS1573	PA	532	0.13470617541	Nonsynonymous
360	HS1579	NP	912	0.0238459160993	Synonymous
361	HS1579	PB1	1381	0.220612391464	Synonymous
362	HS1595	HA	418	0.0315552982759	Nonsynonymous
363	HS1595	M	303	0.0309374082531	Nonsynonymous
364	HS1595	PA	1795	0.102067566964	Nonsynonymous
365	HS1595	PB1	1558	0.0243697569459	Synonymous
366	HS1595	PB2	1099	0.0383825176499	Nonsynonymous
367	HS1596	PB1	1741	0.0267897579618	Synonymous
368	HS1604	PA	916	0.0475818807204	Nonsynonymous
369	HS1604	PB2	1085	0.0371576898886	Nonsynonymous
370	HS1604	HA	997	0.118965758211	Nonsynonymous
371	HS1607	PB2	446	0.0982688776826	Nonsynonymous
372	MH7390	NP	923	0.0404271939275	Nonsynonymous
373	MH7390	NR	866	0.0393442047164	Synonymous
374	MH7390	PA	1978	0.0214917213397	Nonsynonymous
375	MH7390	PB1	2089	0.0291516541107	Synonymous
376	MH7391	HA	995	0.087795844906	Synonymous
377	MH7391	NP	723	0.0536324531095	Synonymous
378	MH7391	PB1	1822	0.0208268208572	Synonymous
379	MH7440	HA	1424	0.0201012039784	Synonymous
380	MH7440	HA	665	0.270574997689	Synonymous
381	MH7440	PA	2079	0.273918168363	Synonymous
382	MH7455	NP	273	0.0351737311541	Synonymous
383	MH7492	PB2	1147	0.156554027081	Synonymous
384	MH7492	NP	495	0.243959588583	Synonymous
385	MH7505	M	677	0.116986427518	Nonsynonymous
386	MH7505	PA	1728	0.0487704192997	Synonymous
387	MH7505	PB1	1652	0.160855955857	Nonsynonymous
388	MH7520	PA	1701	0.475973745988	Synonymous
389	MH7564	PA	1701	0.0333324322132	Synonymous
390	MH7565	PA	1701	0.0461136587657	Synonymous
391	MH7611	HA	1463	0.0439763850454	Nonsynonymous
392	MH7611	NP	1362	0.0412810234528	Synonymous
393	MH7611	PB2	1713	0.0315621488869	Synonymous
394	MH7612	HA	140	0.0498634992657	Synonymous
395	MH7627	HA	1670	0.0349313418453	Synonymous
396	MH7627	PA	1175	0.0230061114999	Nonsynonymous
397	MH7627	PB1	1108	0.0409793687369	Synonymous
398	MH7627	PB1	1213	0.022613500316	Synonymous
399	MH7627	PB2	587	0.0286562213244	Nonsynonymous
400	MH7627	PB2	897	0.0293899721004	Synonymous
401	MH7687	PA	1202	0.029538641251	Nonsynonymous
402	MH7687	PA	1201	0.0250320272215	Nonsynonymous
403	MH7755	HA	1025	0.0247380531631	Synonymous
404	MH7755	HA	564	0.0321867371234	Nonsynonymous
405	MH7796	HA	1512	0.111588923505	Nonsynonymous
406	MH7799	HA	1049	0.0914239163906	Synonymous
407	MH7800	NR	501	0.467637282551	Nonsynonymous
408	MH7800	PB1	1705	0.461350779373	Synonymous
409	MH7800	PB1	1798	0.443234092666	Synonymous
410	MH7800	PB1	530	0.473359560691	Nonsynonymous
411	MH7800	PB2	212	0.470121801684	Nonsynonymous
412	MH7804	NP	306	0.0262084144851	Synonymous
413	MH7843	NR	449	0.0267244631601	Nonsynonymous
414	MH7845	HA	1046	0.0231050462443	Synonymous
415	MH7845	M	655	0.063670939569	Synonymous
416	MH7845	NS	244	0.0289458761766	Nonsynonymous
417	MH7851	HA	655	0.174562543218	Nonsynonymous
418	MH7852	HA	524	0.489384735077	Synonymous
419	MH7852	HA	638	0.0359769154235	Synonymous
420	MH7852	NP	914	0.0432845476875	Nonsynonymous
421	MH7852	NS	538	0.48757896261	Nonsynonymous
422	MH7852	PA	927	0.0779471069765	Synonymous
423	MH7852	PB1	430	0.0396486125248	Synonymous
424	MH7855	PA	984	0.0217852295444	Synonymous
425	MH7855	PB1	577	0.0827635346589	Synonymous
426	MH7855	PB2	1785	0.0318535602867	Synonymous
427	MH7860	HA	459	0.110522479152	Nonsynonymous
428	MH7860	NP	1407	0.0432148926624	Synonymous
429	MH7860	NP	735	0.0429205601746	Synonymous
430	MH7860	NR	452	0.024604648721	Nonsynonymous
431	MH7860	NS	140	0.0329920540903	Synonymous
432	MH7860	NS	233	0.0322513524761	Synonymous
433	MH7860	NS	173	0.0310390335634	Synonymous
434	MH7860	PB1	1109	0.0268645421677	Synonymous
435	MH7860	PB1	650	0.029230595902	Nonsynonymous
436	MH7884	NR	174	0.103353285093	Nonsynonymous
437	MH7884	NR	204	0.105418555052	Nonsynonymous
438	MH7884	NR	220	0.0944041703999	Synonymous
439	MH7884	NR	221	0.1011110223	Synonymous
440	MH7884	NR	249	0.104666794699	Nonsynonymous
441	MH7884	NS	169	0.382374742032	Nonsynonymous
442	MH7886	HA	545	0.18189226088	Synonymous
443	MH7886	PA	348	0.0300537980878	Synonymous
444	MH7890	NP	1011	0.321690423285	Synonymous
445	MH7890	NP	402	0.0537544777979	Synonymous
446	MH7890	NR	250	0.271666666667	Nonsynonymous
447	MH7890	NS	77	0.0201493318979	Synonymous
448	MH7891	NP	1334	0.0545497547818	Nonsynonymous
449	MH7891	PA	384	0.0517465143171	Synonymous
450	MH7893	M	916	0.0249870756505	Nonsynonymous
451	MH7893	PA	459	0.0681411797764	Synonymous
452	MH7893	PA	1059	0.0273408828772	Synonymous
453	MH7905	NP	942	0.0977810655399	Synonymous
454	MH7953	PB1	463	0.0748051062923	Synonymous
455	MH8041	PB1	778	0.0220178065715	Synonymous
456	MH8052	HA	862	0.0301231869331	Nonsynonymous
457	MH8052	PB1	677	0.028997307956	Nonsynonymous
458	MH8088	HA	1178	0.0413910882347	Synonymous
459	MH8088	HA	1475	0.0417286269701	Synonymous
460	MH8088	M	484	0.0209838939155	Synonymous
461	MH8088	NP	108	0.0358219006488	Synonymous
462	MH8088	PA	201	0.0276076825647	Synonymous
463	MH8088	PB2	1015	0.0451564601606	Nonsynonymous
464	MH8088	PB2	1911	0.0269257841865	Synonymous
465	MH8088	PB2	2187	0.385372324046	Synonymous
466	MH8088	M	214	0.129615827631	Synonymous
467	MH8089	HA	1433	0.167855170801	Synonymous
468	MH8089	M	379	0.0505068125595	Synonymous
469	MH8089	NR	487	0.0756390477738	Synonymous
470	MH8089	NS	233	0.020260001288	Synonymous
471	MH8089	PB1	281	0.216517063177	Synonymous
472	MH8089	PB2	1258	0.235793987068	Nonsynonymous
473	MH8090	NS	468	0.497550142941	Synonymous
474	MH8125	M	721	0.0755530848731	Synonymous
475	MH8125	NS	140	0.0764177797241	Synonymous
476	MH8125	NS	173	0.0802175390891	Synonymous
477	MH8125	NS	440	0.0241244183161	Nonsynonymous
478	MH8125	PA	1605	0.0262236164834	Synonymous
479	MH8125	PA	180	0.0230176211454	Synonymous
480	MH8125	PA	552	0.0224108822864	Synonymous
481	MH8125	PA	807	0.0241789623989	Synonymous
482	MH8125	PA	1014	0.0235300535364	Synonymous
483	MH8125	PB1	884	0.0219176859209	Nonsynonymous
484	MH8125	PB1	1030	0.0220879913451	Synonymous
485	MH8125	PB1	1345	0.0621787009043	Synonymous
486	MH8125	PB1	1820	0.0222056107642	Synonymous
487	MH8125	PB1	538	0.0223448876923	Nonsynonymous
488	MH8125	PB1	650	0.0261827823349	Nonsynonymous
489	MH8126	M	464	0.38548294533	Nonsynonymous
490	MH8126	NS	553	0.0213012737322	Nonsynonymous
491	MH8129	NS	136	0.0268568997688	Nonsynonymous
492	MH8129	PA	773	0.105173460212	Nonsynonymous
493	MH8129	PB1	1954	0.0721176516153	Nonsynonymous
494	MH8129	PB2	954	0.493070050931	Synonymous
495	MH8155	PB2	2113	0.333314318553	Nonsynonymous
496	MH8155	NP	1132	0.330987717503	Nonsynonymous
497	MH8156	PB1	1009	0.0452488687783	Nonsynonymous
498	MH8156	PB1	1276	0.048480463097	Synonymous
499	MH8156	PB1	1348	0.0513803680982	Synonymous
500	MH8156	PB1	820	0.0433937823834	Synonymous
501	MH8156	PB1	1067	0.046817849305	Synonymous
502	MH8156	PB1	163	0.0203045685279	Nonsynonymous
503	MH8156	PB1	1173	0.0527704485488	Nonsynonymous
504	MH8156	PB1	205	0.0537313432836	Nonsynonymous
505	MH8156	PB1	421	0.0534296028881	Synonymous
506	MH8156	PB1	811	0.0480519480519	Synonymous
507	MH8156	PB1	832	0.0430868167203	Synonymous
508	MH8156	PB2	1842	0.495237882416	Synonymous
509	MH8156	PB2	414	0.0355140186916	Synonymous
510	MH8156	PB2	642	0.487383776923	Synonymous
511	MH8156	PB2	666	0.051	Synonymous
512	MH8159	NS	287	0.037064665189	Synonymous
513	MH8160	NP	295	0.0282610972159	Nonsynonymous
514	MH8165	NR	248	0.0978330437963	Nonsynonymous
515	MH8165	PB1	557	0.0692931663872	Nonsynonymous
516	MH8165	PB2	1691	0.0217924923698	Nonsynonymous
517	MH8183	M	292	0.0518150335153	Nonsynonymous
518	MH8183	PB1	1713	0.152585429812	Nonsynonymous
519	MH8186	HA	1274	0.0449178280835	Synonymous
520	MH8186	M	559	0.0312107008117	Synonymous
521	MH8186	M	214	0.418167542072	Synonymous
522	MH8186	PB2	1626	0.0817615627157	Synonymous
523	MH8186	PB2	2007	0.0345706494099	Synonymous
524	MH8308	HA	1526	0.0414573346808	Nonsynonymous
525	MH8308	NR	959	0.0397616975701	Nonsynonymous
526	MH8354	NP	300	0.0270648583852	Synonymous
527	MH8354	NR	700	0.0378279094117	Synonymous
528	MH8354	PA	2052	0.0455709195935	Synonymous
529	MH8386	PA	1117	0.0827123981284	Synonymous
530	MH8386	PB2	2097	0.0367014627226	Synonymous
531	MH8391	PB1	910	0.0421432505725	Synonymous
532	MH8393	PA	1776	0.0464083544798	Synonymous
533	MH8424	NS	441	0.0214906940287	Nonsynonymous
534	MH8424	NS	729	0.458902519072	Synonymous
535	MH8424	PA	258	0.434210292636	Synonymous
536	MH8424	PB1	1621	0.0289830648868	Nonsynonymous
537	MH8424	PB2	484	0.0436740299109	Nonsynonymous
538	MH8424	PA	1467	0.448453608247	Synonymous
539	MH8439	PB2	1617	0.0238997683461	Synonymous
540	MH8442	NS	687	0.0292183267245	Nonsynonymous
541	MH8445	M	553	0.0328200308996	Synonymous
542	MH8445	PA	1611	0.0514282128035	Synonymous
543	MH8447	NS	459	0.181633983951	Nonsynonymous
544	MH8447	PA	759	0.138142807168	Nonsynonymous
545	MH8447	PB2	192	0.241822113436	Synonymous
546	MH8586	PB1	811	0.167685255921	Synonymous
547	MH8589	HA	332	0.131046393517	Synonymous
548	MH8592	NR	1099	0.0305729417429	Synonymous
549	MH8592	PB1	1837	0.0305646799297	Synonymous
550	MH8592	PB2	2245	0.0510015862057	Nonsynonymous
551	MH8690	PA	1848	0.12118464793	Synonymous
552	MH8690	PB1	1852	0.0428052289357	Synonymous
553	MH8692	HA	891	0.0749459857027	Nonsynonymous
554	MH8692	M	612	0.0498870864871	Nonsynonymous
555	MH8692	NP	1093	0.19787873158	Nonsynonymous
556	MH8692	PA	1183	0.284998499176	Nonsynonymous
557	MH8692	PB1	589	0.173931693828	Synonymous
558	MH8692	PB2	1461	0.0410748179371	Nonsynonymous
559	MH8692	PB2	1779	0.0225214862375	Synonymous
560	MH8700	PA	1551	0.0244930994171	Synonymous
561	MH8766	HA	866	0.055754576684	Synonymous
562	MH8766	NR	1011	0.0406584010261	Nonsynonymous
563	MH8766	PA	346	0.0548465106995	Synonymous
564	MH8766	PA	363	0.0568473674904	Synonymous
565	MH8766	PB1	1381	0.278668534015	Synonymous
566	MH8766	PB2	1353	0.0462796586636	Synonymous
567	MH8766	M	755	0.449394396216	Nonsynonymous
568	MH8922	PB1	1741	0.0245798938441	Synonymous
569	MH8922	PB1	571	0.0259449381869	Synonymous
570	MH8924	PA	603	0.0575332766257	Nonsynonymous
571	MH8924	PB1	1357	0.0588249709766	Synonymous
572	MH8924	PB2	286	0.0511922627981	Nonsynonymous
573	MH8925	NR	604	0.0211669597951	Synonymous
574	MH8925	NS	441	0.0272112598053	Nonsynonymous
575	MH8925	PB1	2104	0.0437288398798	Synonymous
576	MH8925	PB2	872	0.0289518870615	Nonsynonymous
577	MH9045	HA	997	0.160588985754	Nonsynonymous
578	MH9045	PA	916	0.0365481131744	Nonsynonymous
579	MH9045	PB2	1085	0.0598420993163	Nonsynonymous
