# Supplementary material for: Stochastic processes constrain the within and between host evolution of influenza virus
Source: eLife journal article supplement (doi:10.7554/elife.35962), 2018-04-23
Supplement: supp [file elife-35962-supp-v1.zip › elife_poa_e35962_Figure_2_source_data_2.csv]

	HOUSE_ID	ENROLLID	SPECID	season	pcr_result	DPI	H3_pos	Ref_AA	Var_AA	Antigenic	freq.var
1	1275	301203	M54062	2010-2011	A/H1N1	3	NA	['N']	['T']	None	0.0243038547044
2	1302	301355	M54724	2010-2011	A/H3N2	1	86	['L']	['I']	E	0.0876081589394
3	1111	300481	M54913	2010-2011	A/H3N2	0	62	['E']	['G']	E	0.0712147345665
4	1156	300670	M55001	2010-2011	A/H3N2	3	NA	['T']	['I']	None	0.0324267782427
5	2166	320661	MH0778	2011-2012	A/H3N2	1	297	['V']	['A']	C	0.0713594212038
6	3075	331045	MH2436	2012-2013	A/H3N2	1	214	['I']	['T']	D	0.0656507501752
7	3160	330640	MH2936	2012-2013	A/H1N1	2	NA	['P']	['Q']	None	0.0242143471711
8	3311	331541	MH4091	2012-2013	A/H3N2	3	NA	['K']	['E']	None	0.0796845583444
9	4185	UM40738	MH5405	2013-2014	A/H1N1	2	208	['R']	['K']	H1N1	0.0207233615604
10	4140	UM41567	MH5546	2013-2014	A/H1N1	4	NA	['D']	['N']	None	0.0325716598595
11	4016	UM40062	MH5817	2013-2014	A/H1N1	3	NA	['T']	['N']	None	0.0245594206298
12	5114	50482	HS1284	2014-2015	A/H3N2	1	NA	['D']	['N']	None	0.048947720117
13	5147	50630	HS1294	2014-2015	A/H3N2	1	242	['I']	['L']	D	0.163602839312
14	5147	50630	HS1294	2014-2015	A/H3N2	1	NA	['A']	['T']	None	0.0665395939678
15	5033	50141	HS1376	2014-2015	A/H3N2	1	53	['D']	['E']	C	0.0251913260241
16	5033	50141	HS1376	2014-2015	A/H3N2	1	312	['S']	['G']	C	0.0234583211453
17	5204	50874	HS1381	2014-2015	A/H3N2	0	NA	['Y']	['F']	None	0.103900854115
18	5228	50968	HS1401	2014-2015	A/H3N2	1	NA	['M']	['L']	None	0.0341160572648
19	5269	51132	HS1425	2014-2015	A/H3N2	2	242	['I']	['T']	D	0.0280369911772
20	5289	51220	HS1450	2014-2015	A/H3N2	-1	189	['K']	['N']	B	0.0378270981645
21	5158	50677	HS1455	2014-2015	A/H3N2	0	NA	['R']	['H']	None	0.350987594845
22	5249	51054	HS1473	2014-2015	A/H3N2	0	NA	['F']	['L']	None	0.1771161047
23	5234	50993	HS1595	2014-2015	A/H3N2	2	NA	['S']	['L']	None	0.0315552982759
24	5034	50143	HS1604	2014-2015	A/H3N2	1	307	['I']	['R']	C	0.118965758211
25	5073	50318	MH7611	2014-2015	A/H3N2	3	NA	['M']	['I']	None	0.0439763850454
26	5033	50141	MH7755	2014-2015	A/H3N2	2	163	['A']	['T']	B	0.0321867371234
27	5040	50171	MH7796	2014-2015	A/H3N2	0	NA	['G']	['R']	None	0.111588923505
28	5219	50935	MH7851	2014-2015	A/H3N2	3	193	['F']	['S']	B	0.174562543218
29	5263	51106	MH7860	2014-2015	A/H3N2	3	128	['T']	['A']	B	0.110522479152
30	5302	51273	MH8052	2014-2015	A/H3N2	0	262	['S']	['N']	E	0.0301231869331
31	5238	51000	MH8308	2014-2015	A/H3N2	2	NA	['N']	['K']	None	0.0414573346808
32	5017	50068	MH8692	2014-2015	A/H3N2	4	NA	['A']	['S']	None	0.0749459857027
33	5034	50143	MH9045	2014-2015	A/H3N2	2	307	['I']	['R']	C	0.160588985754
