# Supplementary material for: Stochastic processes constrain the within and between host evolution of influenza virus
Source: eLife journal article supplement (doi:10.7554/elife.35962), 2018-04-23
Supplement: supp [file elife-35962-supp-v1.zip › elife_poa_e35962_Figure_2_source_data_3.csv]

	x	mutation	frequency	collect	SPECID	freq.var	Antigenic	season
1	2006	HA1:62G	0.001	2011.24109589041	M54913	0.0712147345665	E	2010-2011
2	2006.08	HA1:62G	8e-04	2011.24109589041	M54913	0.0712147345665	E	2010-2011
3	2006.17	HA1:62G	4e-04	2011.24109589041	M54913	0.0712147345665	E	2010-2011
4	2006.25	HA1:62G	3e-04	2011.24109589041	M54913	0.0712147345665	E	2010-2011
5	2006.33	HA1:62G	2e-04	2011.24109589041	M54913	0.0712147345665	E	2010-2011
6	2006.42	HA1:62G	2e-04	2011.24109589041	M54913	0.0712147345665	E	2010-2011
7	2006.5	HA1:62G	2e-04	2011.24109589041	M54913	0.0712147345665	E	2010-2011
8	2006.58	HA1:62G	2e-04	2011.24109589041	M54913	0.0712147345665	E	2010-2011
9	2006.67	HA1:62G	2e-04	2011.24109589041	M54913	0.0712147345665	E	2010-2011
10	2006.75	HA1:62G	3e-04	2011.24109589041	M54913	0.0712147345665	E	2010-2011
11	2006.83	HA1:62G	3e-04	2011.24109589041	M54913	0.0712147345665	E	2010-2011
12	2006.92	HA1:62G	4e-04	2011.24109589041	M54913	0.0712147345665	E	2010-2011
13	2007	HA1:62G	3e-04	2011.24109589041	M54913	0.0712147345665	E	2010-2011
14	2007.08	HA1:62G	4e-04	2011.24109589041	M54913	0.0712147345665	E	2010-2011
15	2007.17	HA1:62G	6e-04	2011.24109589041	M54913	0.0712147345665	E	2010-2011
16	2007.25	HA1:62G	7e-04	2011.24109589041	M54913	0.0712147345665	E	2010-2011
17	2007.33	HA1:62G	6e-04	2011.24109589041	M54913	0.0712147345665	E	2010-2011
18	2007.42	HA1:62G	5e-04	2011.24109589041	M54913	0.0712147345665	E	2010-2011
19	2007.5	HA1:62G	3e-04	2011.24109589041	M54913	0.0712147345665	E	2010-2011
20	2007.58	HA1:62G	3e-04	2011.24109589041	M54913	0.0712147345665	E	2010-2011
21	2007.67	HA1:62G	3e-04	2011.24109589041	M54913	0.0712147345665	E	2010-2011
22	2007.75	HA1:62G	3e-04	2011.24109589041	M54913	0.0712147345665	E	2010-2011
23	2007.83	HA1:62G	5e-04	2011.24109589041	M54913	0.0712147345665	E	2010-2011
24	2007.92	HA1:62G	6e-04	2011.24109589041	M54913	0.0712147345665	E	2010-2011
25	2008	HA1:62G	8e-04	2011.24109589041	M54913	0.0712147345665	E	2010-2011
26	2008.08	HA1:62G	7e-04	2011.24109589041	M54913	0.0712147345665	E	2010-2011
27	2008.17	HA1:62G	4e-04	2011.24109589041	M54913	0.0712147345665	E	2010-2011
28	2008.25	HA1:62G	6e-04	2011.24109589041	M54913	0.0712147345665	E	2010-2011
29	2008.33	HA1:62G	8e-04	2011.24109589041	M54913	0.0712147345665	E	2010-2011
30	2008.42	HA1:62G	0.0011	2011.24109589041	M54913	0.0712147345665	E	2010-2011
31	2008.5	HA1:62G	0.0013	2011.24109589041	M54913	0.0712147345665	E	2010-2011
32	2008.58	HA1:62G	0.0015	2011.24109589041	M54913	0.0712147345665	E	2010-2011
33	2008.67	HA1:62G	0.0013	2011.24109589041	M54913	0.0712147345665	E	2010-2011
34	2008.75	HA1:62G	0.0015	2011.24109589041	M54913	0.0712147345665	E	2010-2011
35	2008.83	HA1:62G	0.0015	2011.24109589041	M54913	0.0712147345665	E	2010-2011
36	2008.92	HA1:62G	0.0019	2011.24109589041	M54913	0.0712147345665	E	2010-2011
37	2009	HA1:62G	0.0027	2011.24109589041	M54913	0.0712147345665	E	2010-2011
38	2009.08	HA1:62G	0.0039	2011.24109589041	M54913	0.0712147345665	E	2010-2011
39	2009.17	HA1:62G	0.0046	2011.24109589041	M54913	0.0712147345665	E	2010-2011
40	2009.25	HA1:62G	0.0068	2011.24109589041	M54913	0.0712147345665	E	2010-2011
41	2009.33	HA1:62G	0.0055	2011.24109589041	M54913	0.0712147345665	E	2010-2011
42	2009.42	HA1:62G	0.0047	2011.24109589041	M54913	0.0712147345665	E	2010-2011
43	2009.5	HA1:62G	0.0046	2011.24109589041	M54913	0.0712147345665	E	2010-2011
44	2009.58	HA1:62G	0.004	2011.24109589041	M54913	0.0712147345665	E	2010-2011
45	2009.67	HA1:62G	0.0034	2011.24109589041	M54913	0.0712147345665	E	2010-2011
46	2009.75	HA1:62G	0.0028	2011.24109589041	M54913	0.0712147345665	E	2010-2011
47	2009.83	HA1:62G	0.0021	2011.24109589041	M54913	0.0712147345665	E	2010-2011
48	2009.92	HA1:62G	0.0017	2011.24109589041	M54913	0.0712147345665	E	2010-2011
49	2010	HA1:62G	0.0016	2011.24109589041	M54913	0.0712147345665	E	2010-2011
50	2010.08	HA1:62G	0.0019	2011.24109589041	M54913	0.0712147345665	E	2010-2011
51	2010.17	HA1:62G	0.0022	2011.24109589041	M54913	0.0712147345665	E	2010-2011
52	2010.25	HA1:62G	0.0025	2011.24109589041	M54913	0.0712147345665	E	2010-2011
53	2010.33	HA1:62G	0.0026	2011.24109589041	M54913	0.0712147345665	E	2010-2011
54	2010.42	HA1:62G	0.0027	2011.24109589041	M54913	0.0712147345665	E	2010-2011
55	2010.5	HA1:62G	0.0026	2011.24109589041	M54913	0.0712147345665	E	2010-2011
56	2010.58	HA1:62G	0.0024	2011.24109589041	M54913	0.0712147345665	E	2010-2011
57	2010.67	HA1:62G	0.002	2011.24109589041	M54913	0.0712147345665	E	2010-2011
58	2010.75	HA1:62G	0.0017	2011.24109589041	M54913	0.0712147345665	E	2010-2011
59	2010.83	HA1:62G	0.0017	2011.24109589041	M54913	0.0712147345665	E	2010-2011
60	2010.92	HA1:62G	0.0019	2011.24109589041	M54913	0.0712147345665	E	2010-2011
61	2011	HA1:62G	0.0022	2011.24109589041	M54913	0.0712147345665	E	2010-2011
62	2011.08	HA1:62G	0.0029	2011.24109589041	M54913	0.0712147345665	E	2010-2011
63	2011.17	HA1:62G	0.0036	2011.24109589041	M54913	0.0712147345665	E	2010-2011
64	2011.25	HA1:62G	0.0042	2011.24109589041	M54913	0.0712147345665	E	2010-2011
65	2011.33	HA1:62G	0.0044	2011.24109589041	M54913	0.0712147345665	E	2010-2011
66	2011.42	HA1:62G	0.0043	2011.24109589041	M54913	0.0712147345665	E	2010-2011
67	2011.5	HA1:62G	0.0046	2011.24109589041	M54913	0.0712147345665	E	2010-2011
68	2011.58	HA1:62G	0.0048	2011.24109589041	M54913	0.0712147345665	E	2010-2011
69	2011.67	HA1:62G	0.005	2011.24109589041	M54913	0.0712147345665	E	2010-2011
70	2011.75	HA1:62G	0.005	2011.24109589041	M54913	0.0712147345665	E	2010-2011
71	2011.83	HA1:62G	0.0039	2011.24109589041	M54913	0.0712147345665	E	2010-2011
72	2011.92	HA1:62G	0.003	2011.24109589041	M54913	0.0712147345665	E	2010-2011
73	2012	HA1:62G	0.0019	2011.24109589041	M54913	0.0712147345665	E	2010-2011
74	2012.08	HA1:62G	0.0012	2011.24109589041	M54913	0.0712147345665	E	2010-2011
75	2012.17	HA1:62G	9e-04	2011.24109589041	M54913	0.0712147345665	E	2010-2011
76	2012.25	HA1:62G	7e-04	2011.24109589041	M54913	0.0712147345665	E	2010-2011
77	2012.33	HA1:62G	6e-04	2011.24109589041	M54913	0.0712147345665	E	2010-2011
78	2012.42	HA1:62G	5e-04	2011.24109589041	M54913	0.0712147345665	E	2010-2011
79	2012.5	HA1:62G	6e-04	2011.24109589041	M54913	0.0712147345665	E	2010-2011
80	2012.58	HA1:62G	8e-04	2011.24109589041	M54913	0.0712147345665	E	2010-2011
81	2012.67	HA1:62G	0.001	2011.24109589041	M54913	0.0712147345665	E	2010-2011
82	2012.75	HA1:62G	0.001	2011.24109589041	M54913	0.0712147345665	E	2010-2011
83	2012.83	HA1:62G	8e-04	2011.24109589041	M54913	0.0712147345665	E	2010-2011
84	2012.92	HA1:62G	8e-04	2011.24109589041	M54913	0.0712147345665	E	2010-2011
85	2013	HA1:62G	3e-04	2011.24109589041	M54913	0.0712147345665	E	2010-2011
86	2013.08	HA1:62G	2e-04	2011.24109589041	M54913	0.0712147345665	E	2010-2011
87	2013.17	HA1:62G	2e-04	2011.24109589041	M54913	0.0712147345665	E	2010-2011
88	2013.25	HA1:62G	3e-04	2011.24109589041	M54913	0.0712147345665	E	2010-2011
89	2013.33	HA1:62G	4e-04	2011.24109589041	M54913	0.0712147345665	E	2010-2011
90	2013.42	HA1:62G	6e-04	2011.24109589041	M54913	0.0712147345665	E	2010-2011
91	2013.5	HA1:62G	5e-04	2011.24109589041	M54913	0.0712147345665	E	2010-2011
92	2013.58	HA1:62G	5e-04	2011.24109589041	M54913	0.0712147345665	E	2010-2011
93	2013.67	HA1:62G	4e-04	2011.24109589041	M54913	0.0712147345665	E	2010-2011
94	2013.75	HA1:62G	3e-04	2011.24109589041	M54913	0.0712147345665	E	2010-2011
95	2013.83	HA1:62G	5e-04	2011.24109589041	M54913	0.0712147345665	E	2010-2011
96	2013.92	HA1:62G	9e-04	2011.24109589041	M54913	0.0712147345665	E	2010-2011
97	2014	HA1:62G	0.0014	2011.24109589041	M54913	0.0712147345665	E	2010-2011
98	2014.08	HA1:62G	0.0022	2011.24109589041	M54913	0.0712147345665	E	2010-2011
99	2014.17	HA1:62G	0.0037	2011.24109589041	M54913	0.0712147345665	E	2010-2011
100	2014.25	HA1:62G	0.006	2011.24109589041	M54913	0.0712147345665	E	2010-2011
101	2014.33	HA1:62G	0.0075	2011.24109589041	M54913	0.0712147345665	E	2010-2011
102	2014.42	HA1:62G	0.0094	2011.24109589041	M54913	0.0712147345665	E	2010-2011
103	2014.5	HA1:62G	0.0105	2011.24109589041	M54913	0.0712147345665	E	2010-2011
104	2014.58	HA1:62G	0.0145	2011.24109589041	M54913	0.0712147345665	E	2010-2011
105	2014.67	HA1:62G	0.0201	2011.24109589041	M54913	0.0712147345665	E	2010-2011
106	2014.75	HA1:62G	0.0272	2011.24109589041	M54913	0.0712147345665	E	2010-2011
107	2014.83	HA1:62G	0.0282	2011.24109589041	M54913	0.0712147345665	E	2010-2011
108	2014.92	HA1:62G	0.0211	2011.24109589041	M54913	0.0712147345665	E	2010-2011
109	2015	HA1:62G	0.0118	2011.24109589041	M54913	0.0712147345665	E	2010-2011
110	2015.08	HA1:62G	0.0082	2011.24109589041	M54913	0.0712147345665	E	2010-2011
111	2015.17	HA1:62G	0.0057	2011.24109589041	M54913	0.0712147345665	E	2010-2011
112	2015.25	HA1:62G	0.0033	2011.24109589041	M54913	0.0712147345665	E	2010-2011
113	2015.33	HA1:62G	0.0021	2011.24109589041	M54913	0.0712147345665	E	2010-2011
114	2015.42	HA1:62G	0.0015	2011.24109589041	M54913	0.0712147345665	E	2010-2011
115	2015.5	HA1:62G	0.001	2011.24109589041	M54913	0.0712147345665	E	2010-2011
116	2015.58	HA1:62G	8e-04	2011.24109589041	M54913	0.0712147345665	E	2010-2011
117	2015.67	HA1:62G	8e-04	2011.24109589041	M54913	0.0712147345665	E	2010-2011
118	2015.75	HA1:62G	0.0012	2011.24109589041	M54913	0.0712147345665	E	2010-2011
119	2015.83	HA1:62G	0.0017	2011.24109589041	M54913	0.0712147345665	E	2010-2011
120	2015.92	HA1:62G	0.0022	2011.24109589041	M54913	0.0712147345665	E	2010-2011
121	2016	HA1:62G	0.0022	2011.24109589041	M54913	0.0712147345665	E	2010-2011
122	2016.08	HA1:62G	0.002	2011.24109589041	M54913	0.0712147345665	E	2010-2011
123	2016.17	HA1:62G	0.0027	2011.24109589041	M54913	0.0712147345665	E	2010-2011
124	2016.25	HA1:62G	0.0044	2011.24109589041	M54913	0.0712147345665	E	2010-2011
125	2016.33	HA1:62G	0.0057	2011.24109589041	M54913	0.0712147345665	E	2010-2011
126	2016.42	HA1:62G	0.0056	2011.24109589041	M54913	0.0712147345665	E	2010-2011
127	2016.5	HA1:62G	0.0044	2011.24109589041	M54913	0.0712147345665	E	2010-2011
128	2016.58	HA1:62G	0.004	2011.24109589041	M54913	0.0712147345665	E	2010-2011
129	2016.67	HA1:62G	0.0026	2011.24109589041	M54913	0.0712147345665	E	2010-2011
130	2016.75	HA1:62G	0.0021	2011.24109589041	M54913	0.0712147345665	E	2010-2011
131	2016.83	HA1:62G	0.0023	2011.24109589041	M54913	0.0712147345665	E	2010-2011
132	2016.92	HA1:62G	0.0036	2011.24109589041	M54913	0.0712147345665	E	2010-2011
133	2017	HA1:62G	0.0072	2011.24109589041	M54913	0.0712147345665	E	2010-2011
134	2017.08	HA1:62G	0.0191	2011.24109589041	M54913	0.0712147345665	E	2010-2011
135	2017.17	HA1:62G	0.0399	2011.24109589041	M54913	0.0712147345665	E	2010-2011
136	2017.25	HA1:62G	0.0774	2011.24109589041	M54913	0.0712147345665	E	2010-2011
137	2017.33	HA1:62G	0.1583	2011.24109589041	M54913	0.0712147345665	E	2010-2011
138	2017.42	HA1:62G	0.2233	2011.24109589041	M54913	0.0712147345665	E	2010-2011
139	2017.5	HA1:62G	0.2464	2011.24109589041	M54913	0.0712147345665	E	2010-2011
140	2017.58	HA1:62G	0.2633	2011.24109589041	M54913	0.0712147345665	E	2010-2011
141	2017.67	HA1:62G	0.2807	2011.24109589041	M54913	0.0712147345665	E	2010-2011
142	2017.75	HA1:62G	0.2724	2011.24109589041	M54913	0.0712147345665	E	2010-2011
143	2017.83	HA1:62G	0.2442	2011.24109589041	M54913	0.0712147345665	E	2010-2011
144	2017.92	HA1:62G	0.2078	2011.24109589041	M54913	0.0712147345665	E	2010-2011
145	2018	HA1:62G	0.2044	2011.24109589041	M54913	0.0712147345665	E	2010-2011
146	2006	HA1:193S	0.2038	2014.93424657534	MH7851	0.174562543218	B	2014-2015
147	2006.08	HA1:193S	0.1961	2014.93424657534	MH7851	0.174562543218	B	2014-2015
148	2006.17	HA1:193S	0.183	2014.93424657534	MH7851	0.174562543218	B	2014-2015
149	2006.25	HA1:193S	0.1729	2014.93424657534	MH7851	0.174562543218	B	2014-2015
150	2006.33	HA1:193S	0.157	2014.93424657534	MH7851	0.174562543218	B	2014-2015
151	2006.42	HA1:193S	0.1328	2014.93424657534	MH7851	0.174562543218	B	2014-2015
152	2006.5	HA1:193S	0.1046	2014.93424657534	MH7851	0.174562543218	B	2014-2015
153	2006.58	HA1:193S	0.0823	2014.93424657534	MH7851	0.174562543218	B	2014-2015
154	2006.67	HA1:193S	0.0647	2014.93424657534	MH7851	0.174562543218	B	2014-2015
155	2006.75	HA1:193S	0.0508	2014.93424657534	MH7851	0.174562543218	B	2014-2015
156	2006.83	HA1:193S	0.0421	2014.93424657534	MH7851	0.174562543218	B	2014-2015
157	2006.92	HA1:193S	0.0332	2014.93424657534	MH7851	0.174562543218	B	2014-2015
158	2007	HA1:193S	0.0198	2014.93424657534	MH7851	0.174562543218	B	2014-2015
159	2007.08	HA1:193S	0.011	2014.93424657534	MH7851	0.174562543218	B	2014-2015
160	2007.17	HA1:193S	0.0072	2014.93424657534	MH7851	0.174562543218	B	2014-2015
161	2007.25	HA1:193S	0.0048	2014.93424657534	MH7851	0.174562543218	B	2014-2015
162	2007.33	HA1:193S	0.0028	2014.93424657534	MH7851	0.174562543218	B	2014-2015
163	2007.42	HA1:193S	0.0018	2014.93424657534	MH7851	0.174562543218	B	2014-2015
164	2007.5	HA1:193S	0.0015	2014.93424657534	MH7851	0.174562543218	B	2014-2015
165	2007.58	HA1:193S	0.0025	2014.93424657534	MH7851	0.174562543218	B	2014-2015
166	2007.67	HA1:193S	0.0039	2014.93424657534	MH7851	0.174562543218	B	2014-2015
167	2007.75	HA1:193S	0.0038	2014.93424657534	MH7851	0.174562543218	B	2014-2015
168	2007.83	HA1:193S	0.0026	2014.93424657534	MH7851	0.174562543218	B	2014-2015
169	2007.92	HA1:193S	0.0019	2014.93424657534	MH7851	0.174562543218	B	2014-2015
170	2008	HA1:193S	0.0019	2014.93424657534	MH7851	0.174562543218	B	2014-2015
171	2008.08	HA1:193S	0.0016	2014.93424657534	MH7851	0.174562543218	B	2014-2015
172	2008.17	HA1:193S	0.0017	2014.93424657534	MH7851	0.174562543218	B	2014-2015
173	2008.25	HA1:193S	0.0033	2014.93424657534	MH7851	0.174562543218	B	2014-2015
174	2008.33	HA1:193S	0.0063	2014.93424657534	MH7851	0.174562543218	B	2014-2015
175	2008.42	HA1:193S	0.0116	2014.93424657534	MH7851	0.174562543218	B	2014-2015
176	2008.5	HA1:193S	0.0191	2014.93424657534	MH7851	0.174562543218	B	2014-2015
177	2008.58	HA1:193S	0.0136	2014.93424657534	MH7851	0.174562543218	B	2014-2015
178	2008.67	HA1:193S	0.0089	2014.93424657534	MH7851	0.174562543218	B	2014-2015
179	2008.75	HA1:193S	0.0069	2014.93424657534	MH7851	0.174562543218	B	2014-2015
180	2008.83	HA1:193S	0.0058	2014.93424657534	MH7851	0.174562543218	B	2014-2015
181	2008.92	HA1:193S	0.0056	2014.93424657534	MH7851	0.174562543218	B	2014-2015
182	2009	HA1:193S	0.0069	2014.93424657534	MH7851	0.174562543218	B	2014-2015
183	2009.08	HA1:193S	0.0077	2014.93424657534	MH7851	0.174562543218	B	2014-2015
184	2009.17	HA1:193S	0.0061	2014.93424657534	MH7851	0.174562543218	B	2014-2015
185	2009.25	HA1:193S	0.0068	2014.93424657534	MH7851	0.174562543218	B	2014-2015
186	2009.33	HA1:193S	0.0049	2014.93424657534	MH7851	0.174562543218	B	2014-2015
187	2009.42	HA1:193S	0.0031	2014.93424657534	MH7851	0.174562543218	B	2014-2015
188	2009.5	HA1:193S	0.0021	2014.93424657534	MH7851	0.174562543218	B	2014-2015
189	2009.58	HA1:193S	0.0025	2014.93424657534	MH7851	0.174562543218	B	2014-2015
190	2009.67	HA1:193S	0.0044	2014.93424657534	MH7851	0.174562543218	B	2014-2015
191	2009.75	HA1:193S	0.0064	2014.93424657534	MH7851	0.174562543218	B	2014-2015
192	2009.83	HA1:193S	0.0056	2014.93424657534	MH7851	0.174562543218	B	2014-2015
193	2009.92	HA1:193S	0.005	2014.93424657534	MH7851	0.174562543218	B	2014-2015
194	2010	HA1:193S	0.0053	2014.93424657534	MH7851	0.174562543218	B	2014-2015
195	2010.08	HA1:193S	0.0065	2014.93424657534	MH7851	0.174562543218	B	2014-2015
196	2010.17	HA1:193S	0.0084	2014.93424657534	MH7851	0.174562543218	B	2014-2015
197	2010.25	HA1:193S	0.0106	2014.93424657534	MH7851	0.174562543218	B	2014-2015
198	2010.33	HA1:193S	0.0126	2014.93424657534	MH7851	0.174562543218	B	2014-2015
199	2010.42	HA1:193S	0.0125	2014.93424657534	MH7851	0.174562543218	B	2014-2015
200	2010.5	HA1:193S	0.01	2014.93424657534	MH7851	0.174562543218	B	2014-2015
201	2010.58	HA1:193S	0.0066	2014.93424657534	MH7851	0.174562543218	B	2014-2015
202	2010.67	HA1:193S	0.0042	2014.93424657534	MH7851	0.174562543218	B	2014-2015
203	2010.75	HA1:193S	0.0027	2014.93424657534	MH7851	0.174562543218	B	2014-2015
204	2010.83	HA1:193S	0.0016	2014.93424657534	MH7851	0.174562543218	B	2014-2015
205	2010.92	HA1:193S	0.001	2014.93424657534	MH7851	0.174562543218	B	2014-2015
206	2011	HA1:193S	6e-04	2014.93424657534	MH7851	0.174562543218	B	2014-2015
207	2011.08	HA1:193S	3e-04	2014.93424657534	MH7851	0.174562543218	B	2014-2015
208	2011.17	HA1:193S	2e-04	2014.93424657534	MH7851	0.174562543218	B	2014-2015
209	2011.25	HA1:193S	2e-04	2014.93424657534	MH7851	0.174562543218	B	2014-2015
210	2011.33	HA1:193S	3e-04	2014.93424657534	MH7851	0.174562543218	B	2014-2015
211	2011.42	HA1:193S	5e-04	2014.93424657534	MH7851	0.174562543218	B	2014-2015
212	2011.5	HA1:193S	0.001	2014.93424657534	MH7851	0.174562543218	B	2014-2015
213	2011.58	HA1:193S	0.0022	2014.93424657534	MH7851	0.174562543218	B	2014-2015
214	2011.67	HA1:193S	0.0048	2014.93424657534	MH7851	0.174562543218	B	2014-2015
215	2011.75	HA1:193S	0.0113	2014.93424657534	MH7851	0.174562543218	B	2014-2015
216	2011.83	HA1:193S	0.0251	2014.93424657534	MH7851	0.174562543218	B	2014-2015
217	2011.92	HA1:193S	0.0447	2014.93424657534	MH7851	0.174562543218	B	2014-2015
218	2012	HA1:193S	0.0256	2014.93424657534	MH7851	0.174562543218	B	2014-2015
219	2012.08	HA1:193S	0.0135	2014.93424657534	MH7851	0.174562543218	B	2014-2015
220	2012.17	HA1:193S	0.0103	2014.93424657534	MH7851	0.174562543218	B	2014-2015
221	2012.25	HA1:193S	0.0085	2014.93424657534	MH7851	0.174562543218	B	2014-2015
222	2012.33	HA1:193S	0.0048	2014.93424657534	MH7851	0.174562543218	B	2014-2015
223	2012.42	HA1:193S	0.0026	2014.93424657534	MH7851	0.174562543218	B	2014-2015
224	2012.5	HA1:193S	0.0015	2014.93424657534	MH7851	0.174562543218	B	2014-2015
225	2012.58	HA1:193S	0.0015	2014.93424657534	MH7851	0.174562543218	B	2014-2015
226	2012.67	HA1:193S	0.0017	2014.93424657534	MH7851	0.174562543218	B	2014-2015
227	2012.75	HA1:193S	0.0015	2014.93424657534	MH7851	0.174562543218	B	2014-2015
228	2012.83	HA1:193S	0.0012	2014.93424657534	MH7851	0.174562543218	B	2014-2015
229	2012.92	HA1:193S	0.0013	2014.93424657534	MH7851	0.174562543218	B	2014-2015
230	2013	HA1:193S	8e-04	2014.93424657534	MH7851	0.174562543218	B	2014-2015
231	2013.08	HA1:193S	9e-04	2014.93424657534	MH7851	0.174562543218	B	2014-2015
232	2013.17	HA1:193S	0.0019	2014.93424657534	MH7851	0.174562543218	B	2014-2015
233	2013.25	HA1:193S	0.0025	2014.93424657534	MH7851	0.174562543218	B	2014-2015
234	2013.33	HA1:193S	0.0023	2014.93424657534	MH7851	0.174562543218	B	2014-2015
235	2013.42	HA1:193S	0.0023	2014.93424657534	MH7851	0.174562543218	B	2014-2015
236	2013.5	HA1:193S	0.0017	2014.93424657534	MH7851	0.174562543218	B	2014-2015
237	2013.58	HA1:193S	0.0021	2014.93424657534	MH7851	0.174562543218	B	2014-2015
238	2013.67	HA1:193S	0.0016	2014.93424657534	MH7851	0.174562543218	B	2014-2015
239	2013.75	HA1:193S	0.0012	2014.93424657534	MH7851	0.174562543218	B	2014-2015
240	2013.83	HA1:193S	0.0013	2014.93424657534	MH7851	0.174562543218	B	2014-2015
241	2013.92	HA1:193S	0.0018	2014.93424657534	MH7851	0.174562543218	B	2014-2015
242	2014	HA1:193S	0.0024	2014.93424657534	MH7851	0.174562543218	B	2014-2015
243	2014.08	HA1:193S	0.0039	2014.93424657534	MH7851	0.174562543218	B	2014-2015
244	2014.17	HA1:193S	0.0077	2014.93424657534	MH7851	0.174562543218	B	2014-2015
245	2014.25	HA1:193S	0.0124	2014.93424657534	MH7851	0.174562543218	B	2014-2015
246	2014.33	HA1:193S	0.0135	2014.93424657534	MH7851	0.174562543218	B	2014-2015
247	2014.42	HA1:193S	0.0114	2014.93424657534	MH7851	0.174562543218	B	2014-2015
248	2014.5	HA1:193S	0.0059	2014.93424657534	MH7851	0.174562543218	B	2014-2015
249	2014.58	HA1:193S	0.0034	2014.93424657534	MH7851	0.174562543218	B	2014-2015
250	2014.67	HA1:193S	0.0028	2014.93424657534	MH7851	0.174562543218	B	2014-2015
251	2014.75	HA1:193S	0.0038	2014.93424657534	MH7851	0.174562543218	B	2014-2015
252	2014.83	HA1:193S	0.0065	2014.93424657534	MH7851	0.174562543218	B	2014-2015
253	2014.92	HA1:193S	0.0079	2014.93424657534	MH7851	0.174562543218	B	2014-2015
254	2015	HA1:193S	0.0056	2014.93424657534	MH7851	0.174562543218	B	2014-2015
255	2015.08	HA1:193S	0.0059	2014.93424657534	MH7851	0.174562543218	B	2014-2015
256	2015.17	HA1:193S	0.0092	2014.93424657534	MH7851	0.174562543218	B	2014-2015
257	2015.25	HA1:193S	0.0122	2014.93424657534	MH7851	0.174562543218	B	2014-2015
258	2015.33	HA1:193S	0.0103	2014.93424657534	MH7851	0.174562543218	B	2014-2015
259	2015.42	HA1:193S	0.0061	2014.93424657534	MH7851	0.174562543218	B	2014-2015
260	2015.5	HA1:193S	0.0031	2014.93424657534	MH7851	0.174562543218	B	2014-2015
261	2015.58	HA1:193S	0.0016	2014.93424657534	MH7851	0.174562543218	B	2014-2015
262	2015.67	HA1:193S	0.0013	2014.93424657534	MH7851	0.174562543218	B	2014-2015
263	2015.75	HA1:193S	0.0021	2014.93424657534	MH7851	0.174562543218	B	2014-2015
264	2015.83	HA1:193S	0.0034	2014.93424657534	MH7851	0.174562543218	B	2014-2015
265	2015.92	HA1:193S	0.005	2014.93424657534	MH7851	0.174562543218	B	2014-2015
266	2016	HA1:193S	0.0094	2014.93424657534	MH7851	0.174562543218	B	2014-2015
267	2016.08	HA1:193S	0.0183	2014.93424657534	MH7851	0.174562543218	B	2014-2015
268	2016.17	HA1:193S	0.0253	2014.93424657534	MH7851	0.174562543218	B	2014-2015
269	2016.25	HA1:193S	0.0231	2014.93424657534	MH7851	0.174562543218	B	2014-2015
270	2016.33	HA1:193S	0.0202	2014.93424657534	MH7851	0.174562543218	B	2014-2015
271	2016.42	HA1:193S	0.0203	2014.93424657534	MH7851	0.174562543218	B	2014-2015
272	2016.5	HA1:193S	0.0162	2014.93424657534	MH7851	0.174562543218	B	2014-2015
273	2016.58	HA1:193S	0.0171	2014.93424657534	MH7851	0.174562543218	B	2014-2015
274	2016.67	HA1:193S	0.0094	2014.93424657534	MH7851	0.174562543218	B	2014-2015
275	2016.75	HA1:193S	0.01	2014.93424657534	MH7851	0.174562543218	B	2014-2015
276	2016.83	HA1:193S	0.0178	2014.93424657534	MH7851	0.174562543218	B	2014-2015
277	2016.92	HA1:193S	0.029	2014.93424657534	MH7851	0.174562543218	B	2014-2015
278	2017	HA1:193S	0.0402	2014.93424657534	MH7851	0.174562543218	B	2014-2015
279	2017.08	HA1:193S	0.06	2014.93424657534	MH7851	0.174562543218	B	2014-2015
280	2017.17	HA1:193S	0.1042	2014.93424657534	MH7851	0.174562543218	B	2014-2015
281	2017.25	HA1:193S	0.1137	2014.93424657534	MH7851	0.174562543218	B	2014-2015
282	2017.33	HA1:193S	0.0863	2014.93424657534	MH7851	0.174562543218	B	2014-2015
283	2017.42	HA1:193S	0.0517	2014.93424657534	MH7851	0.174562543218	B	2014-2015
284	2017.5	HA1:193S	0.0227	2014.93424657534	MH7851	0.174562543218	B	2014-2015
285	2017.58	HA1:193S	0.0102	2014.93424657534	MH7851	0.174562543218	B	2014-2015
286	2017.67	HA1:193S	0.007	2014.93424657534	MH7851	0.174562543218	B	2014-2015
287	2017.75	HA1:193S	0.0091	2014.93424657534	MH7851	0.174562543218	B	2014-2015
288	2017.83	HA1:193S	0.015	2014.93424657534	MH7851	0.174562543218	B	2014-2015
289	2017.92	HA1:193S	0.0212	2014.93424657534	MH7851	0.174562543218	B	2014-2015
290	2018	HA1:193S	0.0246	2014.93424657534	MH7851	0.174562543218	B	2014-2015
291	2006	HA1:128A	0.0131	2014.93698630137	MH7860	0.110522479152	B	2014-2015
292	2006.08	HA1:128A	0.0161	2014.93698630137	MH7860	0.110522479152	B	2014-2015
293	2006.17	HA1:128A	0.0277	2014.93698630137	MH7860	0.110522479152	B	2014-2015
294	2006.25	HA1:128A	0.047	2014.93698630137	MH7860	0.110522479152	B	2014-2015
295	2006.33	HA1:128A	0.0817	2014.93698630137	MH7860	0.110522479152	B	2014-2015
296	2006.42	HA1:128A	0.129	2014.93698630137	MH7860	0.110522479152	B	2014-2015
297	2006.5	HA1:128A	0.1676	2014.93698630137	MH7860	0.110522479152	B	2014-2015
298	2006.58	HA1:128A	0.1599	2014.93698630137	MH7860	0.110522479152	B	2014-2015
299	2006.67	HA1:128A	0.1284	2014.93698630137	MH7860	0.110522479152	B	2014-2015
300	2006.75	HA1:128A	0.0981	2014.93698630137	MH7860	0.110522479152	B	2014-2015
301	2006.83	HA1:128A	0.0769	2014.93698630137	MH7860	0.110522479152	B	2014-2015
302	2006.92	HA1:128A	0.061	2014.93698630137	MH7860	0.110522479152	B	2014-2015
303	2007	HA1:128A	0.0348	2014.93698630137	MH7860	0.110522479152	B	2014-2015
304	2007.08	HA1:128A	0.0369	2014.93698630137	MH7860	0.110522479152	B	2014-2015
305	2007.17	HA1:128A	0.0524	2014.93698630137	MH7860	0.110522479152	B	2014-2015
306	2007.25	HA1:128A	0.0616	2014.93698630137	MH7860	0.110522479152	B	2014-2015
307	2007.33	HA1:128A	0.0612	2014.93698630137	MH7860	0.110522479152	B	2014-2015
308	2007.42	HA1:128A	0.0604	2014.93698630137	MH7860	0.110522479152	B	2014-2015
309	2007.5	HA1:128A	0.0455	2014.93698630137	MH7860	0.110522479152	B	2014-2015
310	2007.58	HA1:128A	0.0464	2014.93698630137	MH7860	0.110522479152	B	2014-2015
311	2007.67	HA1:128A	0.0329	2014.93698630137	MH7860	0.110522479152	B	2014-2015
312	2007.75	HA1:128A	0.0197	2014.93698630137	MH7860	0.110522479152	B	2014-2015
313	2007.83	HA1:128A	0.0152	2014.93698630137	MH7860	0.110522479152	B	2014-2015
314	2007.92	HA1:128A	0.0107	2014.93698630137	MH7860	0.110522479152	B	2014-2015
315	2008	HA1:128A	0.0077	2014.93698630137	MH7860	0.110522479152	B	2014-2015
316	2008.08	HA1:128A	0.0048	2014.93698630137	MH7860	0.110522479152	B	2014-2015
317	2008.17	HA1:128A	0.0013	2014.93698630137	MH7860	0.110522479152	B	2014-2015
318	2008.25	HA1:128A	6e-04	2014.93698630137	MH7860	0.110522479152	B	2014-2015
319	2008.33	HA1:128A	5e-04	2014.93698630137	MH7860	0.110522479152	B	2014-2015
320	2008.42	HA1:128A	4e-04	2014.93698630137	MH7860	0.110522479152	B	2014-2015
321	2008.5	HA1:128A	6e-04	2014.93698630137	MH7860	0.110522479152	B	2014-2015
322	2008.58	HA1:128A	0.0012	2014.93698630137	MH7860	0.110522479152	B	2014-2015
323	2008.67	HA1:128A	0.0022	2014.93698630137	MH7860	0.110522479152	B	2014-2015
324	2008.75	HA1:128A	0.0035	2014.93698630137	MH7860	0.110522479152	B	2014-2015
325	2008.83	HA1:128A	0.0031	2014.93698630137	MH7860	0.110522479152	B	2014-2015
326	2008.92	HA1:128A	0.0017	2014.93698630137	MH7860	0.110522479152	B	2014-2015
327	2009	HA1:128A	0.0011	2014.93698630137	MH7860	0.110522479152	B	2014-2015
328	2009.08	HA1:128A	0.001	2014.93698630137	MH7860	0.110522479152	B	2014-2015
329	2009.17	HA1:128A	9e-04	2014.93698630137	MH7860	0.110522479152	B	2014-2015
330	2009.25	HA1:128A	0.0012	2014.93698630137	MH7860	0.110522479152	B	2014-2015
331	2009.33	HA1:128A	9e-04	2014.93698630137	MH7860	0.110522479152	B	2014-2015
332	2009.42	HA1:128A	4e-04	2014.93698630137	MH7860	0.110522479152	B	2014-2015
333	2009.5	HA1:128A	3e-04	2014.93698630137	MH7860	0.110522479152	B	2014-2015
334	2009.58	HA1:128A	4e-04	2014.93698630137	MH7860	0.110522479152	B	2014-2015
335	2009.67	HA1:128A	6e-04	2014.93698630137	MH7860	0.110522479152	B	2014-2015
336	2009.75	HA1:128A	9e-04	2014.93698630137	MH7860	0.110522479152	B	2014-2015
337	2009.83	HA1:128A	0.001	2014.93698630137	MH7860	0.110522479152	B	2014-2015
338	2009.92	HA1:128A	0.0011	2014.93698630137	MH7860	0.110522479152	B	2014-2015
339	2010	HA1:128A	0.0014	2014.93698630137	MH7860	0.110522479152	B	2014-2015
340	2010.08	HA1:128A	0.0016	2014.93698630137	MH7860	0.110522479152	B	2014-2015
341	2010.17	HA1:128A	0.0017	2014.93698630137	MH7860	0.110522479152	B	2014-2015
342	2010.25	HA1:128A	0.0013	2014.93698630137	MH7860	0.110522479152	B	2014-2015
343	2010.33	HA1:128A	9e-04	2014.93698630137	MH7860	0.110522479152	B	2014-2015
344	2010.42	HA1:128A	7e-04	2014.93698630137	MH7860	0.110522479152	B	2014-2015
345	2010.5	HA1:128A	5e-04	2014.93698630137	MH7860	0.110522479152	B	2014-2015
346	2010.58	HA1:128A	3e-04	2014.93698630137	MH7860	0.110522479152	B	2014-2015
347	2010.67	HA1:128A	2e-04	2014.93698630137	MH7860	0.110522479152	B	2014-2015
348	2010.75	HA1:128A	1e-04	2014.93698630137	MH7860	0.110522479152	B	2014-2015
349	2010.83	HA1:128A	1e-04	2014.93698630137	MH7860	0.110522479152	B	2014-2015
350	2010.92	HA1:128A	1e-04	2014.93698630137	MH7860	0.110522479152	B	2014-2015
351	2011	HA1:128A	0	2014.93698630137	MH7860	0.110522479152	B	2014-2015
352	2011.08	HA1:128A	0	2014.93698630137	MH7860	0.110522479152	B	2014-2015
353	2011.17	HA1:128A	0	2014.93698630137	MH7860	0.110522479152	B	2014-2015
354	2011.25	HA1:128A	0	2014.93698630137	MH7860	0.110522479152	B	2014-2015
355	2011.33	HA1:128A	0	2014.93698630137	MH7860	0.110522479152	B	2014-2015
356	2011.42	HA1:128A	1e-04	2014.93698630137	MH7860	0.110522479152	B	2014-2015
357	2011.5	HA1:128A	1e-04	2014.93698630137	MH7860	0.110522479152	B	2014-2015
358	2011.58	HA1:128A	1e-04	2014.93698630137	MH7860	0.110522479152	B	2014-2015
359	2011.67	HA1:128A	1e-04	2014.93698630137	MH7860	0.110522479152	B	2014-2015
360	2011.75	HA1:128A	2e-04	2014.93698630137	MH7860	0.110522479152	B	2014-2015
361	2011.83	HA1:128A	4e-04	2014.93698630137	MH7860	0.110522479152	B	2014-2015
362	2011.92	HA1:128A	9e-04	2014.93698630137	MH7860	0.110522479152	B	2014-2015
363	2012	HA1:128A	0.0026	2014.93698630137	MH7860	0.110522479152	B	2014-2015
364	2012.08	HA1:128A	0.0069	2014.93698630137	MH7860	0.110522479152	B	2014-2015
365	2012.17	HA1:128A	0.0145	2014.93698630137	MH7860	0.110522479152	B	2014-2015
366	2012.25	HA1:128A	0.0246	2014.93698630137	MH7860	0.110522479152	B	2014-2015
367	2012.33	HA1:128A	0.0332	2014.93698630137	MH7860	0.110522479152	B	2014-2015
368	2012.42	HA1:128A	0.0437	2014.93698630137	MH7860	0.110522479152	B	2014-2015
369	2012.5	HA1:128A	0.0583	2014.93698630137	MH7860	0.110522479152	B	2014-2015
370	2012.58	HA1:128A	0.0788	2014.93698630137	MH7860	0.110522479152	B	2014-2015
371	2012.67	HA1:128A	0.1141	2014.93698630137	MH7860	0.110522479152	B	2014-2015
372	2012.75	HA1:128A	0.165	2014.93698630137	MH7860	0.110522479152	B	2014-2015
373	2012.83	HA1:128A	0.228	2014.93698630137	MH7860	0.110522479152	B	2014-2015
374	2012.92	HA1:128A	0.3043	2014.93698630137	MH7860	0.110522479152	B	2014-2015
375	2013	HA1:128A	0.381	2014.93698630137	MH7860	0.110522479152	B	2014-2015
376	2013.08	HA1:128A	0.4326	2014.93698630137	MH7860	0.110522479152	B	2014-2015
377	2013.17	HA1:128A	0.4591	2014.93698630137	MH7860	0.110522479152	B	2014-2015
378	2013.25	HA1:128A	0.485	2014.93698630137	MH7860	0.110522479152	B	2014-2015
379	2013.33	HA1:128A	0.5049	2014.93698630137	MH7860	0.110522479152	B	2014-2015
380	2013.42	HA1:128A	0.5559	2014.93698630137	MH7860	0.110522479152	B	2014-2015
381	2013.5	HA1:128A	0.6175	2014.93698630137	MH7860	0.110522479152	B	2014-2015
382	2013.58	HA1:128A	0.6702	2014.93698630137	MH7860	0.110522479152	B	2014-2015
383	2013.67	HA1:128A	0.6919	2014.93698630137	MH7860	0.110522479152	B	2014-2015
384	2013.75	HA1:128A	0.692	2014.93698630137	MH7860	0.110522479152	B	2014-2015
385	2013.83	HA1:128A	0.7008	2014.93698630137	MH7860	0.110522479152	B	2014-2015
386	2013.92	HA1:128A	0.7126	2014.93698630137	MH7860	0.110522479152	B	2014-2015
387	2014	HA1:128A	0.7251	2014.93698630137	MH7860	0.110522479152	B	2014-2015
388	2014.08	HA1:128A	0.7077	2014.93698630137	MH7860	0.110522479152	B	2014-2015
389	2014.17	HA1:128A	0.6745	2014.93698630137	MH7860	0.110522479152	B	2014-2015
390	2014.25	HA1:128A	0.6646	2014.93698630137	MH7860	0.110522479152	B	2014-2015
391	2014.33	HA1:128A	0.6842	2014.93698630137	MH7860	0.110522479152	B	2014-2015
392	2014.42	HA1:128A	0.7237	2014.93698630137	MH7860	0.110522479152	B	2014-2015
393	2014.5	HA1:128A	0.7345	2014.93698630137	MH7860	0.110522479152	B	2014-2015
394	2014.58	HA1:128A	0.7328	2014.93698630137	MH7860	0.110522479152	B	2014-2015
395	2014.67	HA1:128A	0.682	2014.93698630137	MH7860	0.110522479152	B	2014-2015
396	2014.75	HA1:128A	0.6053	2014.93698630137	MH7860	0.110522479152	B	2014-2015
397	2014.83	HA1:128A	0.5202	2014.93698630137	MH7860	0.110522479152	B	2014-2015
398	2014.92	HA1:128A	0.4268	2014.93698630137	MH7860	0.110522479152	B	2014-2015
399	2015	HA1:128A	0.3335	2014.93698630137	MH7860	0.110522479152	B	2014-2015
400	2015.08	HA1:128A	0.2673	2014.93698630137	MH7860	0.110522479152	B	2014-2015
401	2015.17	HA1:128A	0.2075	2014.93698630137	MH7860	0.110522479152	B	2014-2015
402	2015.25	HA1:128A	0.1571	2014.93698630137	MH7860	0.110522479152	B	2014-2015
403	2015.33	HA1:128A	0.1274	2014.93698630137	MH7860	0.110522479152	B	2014-2015
404	2015.42	HA1:128A	0.092	2014.93698630137	MH7860	0.110522479152	B	2014-2015
405	2015.5	HA1:128A	0.059	2014.93698630137	MH7860	0.110522479152	B	2014-2015
406	2015.58	HA1:128A	0.0537	2014.93698630137	MH7860	0.110522479152	B	2014-2015
407	2015.67	HA1:128A	0.0468	2014.93698630137	MH7860	0.110522479152	B	2014-2015
408	2015.75	HA1:128A	0.0651	2014.93698630137	MH7860	0.110522479152	B	2014-2015
409	2015.83	HA1:128A	0.0944	2014.93698630137	MH7860	0.110522479152	B	2014-2015
410	2015.92	HA1:128A	0.1147	2014.93698630137	MH7860	0.110522479152	B	2014-2015
411	2016	HA1:128A	0.123	2014.93698630137	MH7860	0.110522479152	B	2014-2015
412	2016.08	HA1:128A	0.1272	2014.93698630137	MH7860	0.110522479152	B	2014-2015
413	2016.17	HA1:128A	0.1205	2014.93698630137	MH7860	0.110522479152	B	2014-2015
414	2016.25	HA1:128A	0.12	2014.93698630137	MH7860	0.110522479152	B	2014-2015
415	2016.33	HA1:128A	0.104	2014.93698630137	MH7860	0.110522479152	B	2014-2015
416	2016.42	HA1:128A	0.0846	2014.93698630137	MH7860	0.110522479152	B	2014-2015
417	2016.5	HA1:128A	0.0474	2014.93698630137	MH7860	0.110522479152	B	2014-2015
418	2016.58	HA1:128A	0.0551	2014.93698630137	MH7860	0.110522479152	B	2014-2015
419	2016.67	HA1:128A	0.0293	2014.93698630137	MH7860	0.110522479152	B	2014-2015
420	2016.75	HA1:128A	0.0217	2014.93698630137	MH7860	0.110522479152	B	2014-2015
421	2016.83	HA1:128A	0.0171	2014.93698630137	MH7860	0.110522479152	B	2014-2015
422	2016.92	HA1:128A	0.0135	2014.93698630137	MH7860	0.110522479152	B	2014-2015
423	2017	HA1:128A	0.014	2014.93698630137	MH7860	0.110522479152	B	2014-2015
424	2017.08	HA1:128A	0.0176	2014.93698630137	MH7860	0.110522479152	B	2014-2015
425	2017.17	HA1:128A	0.029	2014.93698630137	MH7860	0.110522479152	B	2014-2015
426	2017.25	HA1:128A	0.0313	2014.93698630137	MH7860	0.110522479152	B	2014-2015
427	2017.33	HA1:128A	0.0208	2014.93698630137	MH7860	0.110522479152	B	2014-2015
428	2017.42	HA1:128A	0.0171	2014.93698630137	MH7860	0.110522479152	B	2014-2015
429	2017.5	HA1:128A	0.0129	2014.93698630137	MH7860	0.110522479152	B	2014-2015
430	2017.58	HA1:128A	0.0096	2014.93698630137	MH7860	0.110522479152	B	2014-2015
431	2017.67	HA1:128A	0.0098	2014.93698630137	MH7860	0.110522479152	B	2014-2015
432	2017.75	HA1:128A	0.0096	2014.93698630137	MH7860	0.110522479152	B	2014-2015
433	2017.83	HA1:128A	0.0103	2014.93698630137	MH7860	0.110522479152	B	2014-2015
434	2017.92	HA1:128A	0.0125	2014.93698630137	MH7860	0.110522479152	B	2014-2015
435	2018	HA1:128A	0.0131	2014.93698630137	MH7860	0.110522479152	B	2014-2015
436	2006	HA1:262N	0.0087	2014.94794520548	MH8052	0.0301231869331	E	2014-2015
437	2006.08	HA1:262N	0.0091	2014.94794520548	MH8052	0.0301231869331	E	2014-2015
438	2006.17	HA1:262N	0.0088	2014.94794520548	MH8052	0.0301231869331	E	2014-2015
439	2006.25	HA1:262N	0.0063	2014.94794520548	MH8052	0.0301231869331	E	2014-2015
440	2006.33	HA1:262N	0.0041	2014.94794520548	MH8052	0.0301231869331	E	2014-2015
441	2006.42	HA1:262N	0.0026	2014.94794520548	MH8052	0.0301231869331	E	2014-2015
442	2006.5	HA1:262N	0.0018	2014.94794520548	MH8052	0.0301231869331	E	2014-2015
443	2006.58	HA1:262N	0.0015	2014.94794520548	MH8052	0.0301231869331	E	2014-2015
444	2006.67	HA1:262N	0.0014	2014.94794520548	MH8052	0.0301231869331	E	2014-2015
445	2006.75	HA1:262N	0.0014	2014.94794520548	MH8052	0.0301231869331	E	2014-2015
446	2006.83	HA1:262N	0.0015	2014.94794520548	MH8052	0.0301231869331	E	2014-2015
447	2006.92	HA1:262N	0.0013	2014.94794520548	MH8052	0.0301231869331	E	2014-2015
448	2007	HA1:262N	9e-04	2014.94794520548	MH8052	0.0301231869331	E	2014-2015
449	2007.08	HA1:262N	0.0017	2014.94794520548	MH8052	0.0301231869331	E	2014-2015
450	2007.17	HA1:262N	0.0035	2014.94794520548	MH8052	0.0301231869331	E	2014-2015
451	2007.25	HA1:262N	0.0047	2014.94794520548	MH8052	0.0301231869331	E	2014-2015
452	2007.33	HA1:262N	0.0049	2014.94794520548	MH8052	0.0301231869331	E	2014-2015
453	2007.42	HA1:262N	0.0046	2014.94794520548	MH8052	0.0301231869331	E	2014-2015
454	2007.5	HA1:262N	0.0052	2014.94794520548	MH8052	0.0301231869331	E	2014-2015
455	2007.58	HA1:262N	0.005	2014.94794520548	MH8052	0.0301231869331	E	2014-2015
456	2007.67	HA1:262N	0.0074	2014.94794520548	MH8052	0.0301231869331	E	2014-2015
457	2007.75	HA1:262N	0.0136	2014.94794520548	MH8052	0.0301231869331	E	2014-2015
458	2007.83	HA1:262N	0.0218	2014.94794520548	MH8052	0.0301231869331	E	2014-2015
459	2007.92	HA1:262N	0.029	2014.94794520548	MH8052	0.0301231869331	E	2014-2015
460	2008	HA1:262N	0.0243	2014.94794520548	MH8052	0.0301231869331	E	2014-2015
461	2008.08	HA1:262N	0.0158	2014.94794520548	MH8052	0.0301231869331	E	2014-2015
462	2008.17	HA1:262N	0.011	2014.94794520548	MH8052	0.0301231869331	E	2014-2015
463	2008.25	HA1:262N	0.0071	2014.94794520548	MH8052	0.0301231869331	E	2014-2015
464	2008.33	HA1:262N	0.0066	2014.94794520548	MH8052	0.0301231869331	E	2014-2015
465	2008.42	HA1:262N	0.0081	2014.94794520548	MH8052	0.0301231869331	E	2014-2015
466	2008.5	HA1:262N	0.0092	2014.94794520548	MH8052	0.0301231869331	E	2014-2015
467	2008.58	HA1:262N	0.0046	2014.94794520548	MH8052	0.0301231869331	E	2014-2015
468	2008.67	HA1:262N	0.0021	2014.94794520548	MH8052	0.0301231869331	E	2014-2015
469	2008.75	HA1:262N	9e-04	2014.94794520548	MH8052	0.0301231869331	E	2014-2015
470	2008.83	HA1:262N	4e-04	2014.94794520548	MH8052	0.0301231869331	E	2014-2015
471	2008.92	HA1:262N	2e-04	2014.94794520548	MH8052	0.0301231869331	E	2014-2015
472	2009	HA1:262N	2e-04	2014.94794520548	MH8052	0.0301231869331	E	2014-2015
473	2009.08	HA1:262N	2e-04	2014.94794520548	MH8052	0.0301231869331	E	2014-2015
474	2009.17	HA1:262N	4e-04	2014.94794520548	MH8052	0.0301231869331	E	2014-2015
475	2009.25	HA1:262N	7e-04	2014.94794520548	MH8052	0.0301231869331	E	2014-2015
476	2009.33	HA1:262N	0.0014	2014.94794520548	MH8052	0.0301231869331	E	2014-2015
477	2009.42	HA1:262N	0.0027	2014.94794520548	MH8052	0.0301231869331	E	2014-2015
478	2009.5	HA1:262N	0.0042	2014.94794520548	MH8052	0.0301231869331	E	2014-2015
479	2009.58	HA1:262N	0.0053	2014.94794520548	MH8052	0.0301231869331	E	2014-2015
480	2009.67	HA1:262N	0.0058	2014.94794520548	MH8052	0.0301231869331	E	2014-2015
481	2009.75	HA1:262N	0.0063	2014.94794520548	MH8052	0.0301231869331	E	2014-2015
482	2009.83	HA1:262N	0.0078	2014.94794520548	MH8052	0.0301231869331	E	2014-2015
483	2009.92	HA1:262N	0.0097	2014.94794520548	MH8052	0.0301231869331	E	2014-2015
484	2010	HA1:262N	0.0098	2014.94794520548	MH8052	0.0301231869331	E	2014-2015
485	2010.08	HA1:262N	0.0083	2014.94794520548	MH8052	0.0301231869331	E	2014-2015
486	2010.17	HA1:262N	0.0066	2014.94794520548	MH8052	0.0301231869331	E	2014-2015
487	2010.25	HA1:262N	0.0053	2014.94794520548	MH8052	0.0301231869331	E	2014-2015
488	2010.33	HA1:262N	0.0043	2014.94794520548	MH8052	0.0301231869331	E	2014-2015
489	2010.42	HA1:262N	0.0036	2014.94794520548	MH8052	0.0301231869331	E	2014-2015
490	2010.5	HA1:262N	0.0032	2014.94794520548	MH8052	0.0301231869331	E	2014-2015
491	2010.58	HA1:262N	0.0028	2014.94794520548	MH8052	0.0301231869331	E	2014-2015
492	2010.67	HA1:262N	0.0026	2014.94794520548	MH8052	0.0301231869331	E	2014-2015
493	2010.75	HA1:262N	0.0031	2014.94794520548	MH8052	0.0301231869331	E	2014-2015
494	2010.83	HA1:262N	0.0029	2014.94794520548	MH8052	0.0301231869331	E	2014-2015
495	2010.92	HA1:262N	0.0029	2014.94794520548	MH8052	0.0301231869331	E	2014-2015
496	2011	HA1:262N	0.0022	2014.94794520548	MH8052	0.0301231869331	E	2014-2015
497	2011.08	HA1:262N	0.0017	2014.94794520548	MH8052	0.0301231869331	E	2014-2015
498	2011.17	HA1:262N	0.0021	2014.94794520548	MH8052	0.0301231869331	E	2014-2015
499	2011.25	HA1:262N	0.0026	2014.94794520548	MH8052	0.0301231869331	E	2014-2015
500	2011.33	HA1:262N	0.0034	2014.94794520548	MH8052	0.0301231869331	E	2014-2015
501	2011.42	HA1:262N	0.0049	2014.94794520548	MH8052	0.0301231869331	E	2014-2015
502	2011.5	HA1:262N	0.0068	2014.94794520548	MH8052	0.0301231869331	E	2014-2015
503	2011.58	HA1:262N	0.0071	2014.94794520548	MH8052	0.0301231869331	E	2014-2015
504	2011.67	HA1:262N	0.0061	2014.94794520548	MH8052	0.0301231869331	E	2014-2015
505	2011.75	HA1:262N	0.0048	2014.94794520548	MH8052	0.0301231869331	E	2014-2015
506	2011.83	HA1:262N	0.0034	2014.94794520548	MH8052	0.0301231869331	E	2014-2015
507	2011.92	HA1:262N	0.0032	2014.94794520548	MH8052	0.0301231869331	E	2014-2015
508	2012	HA1:262N	0.0045	2014.94794520548	MH8052	0.0301231869331	E	2014-2015
509	2012.08	HA1:262N	0.0033	2014.94794520548	MH8052	0.0301231869331	E	2014-2015
510	2012.17	HA1:262N	0.0026	2014.94794520548	MH8052	0.0301231869331	E	2014-2015
511	2012.25	HA1:262N	0.0018	2014.94794520548	MH8052	0.0301231869331	E	2014-2015
512	2012.33	HA1:262N	0.002	2014.94794520548	MH8052	0.0301231869331	E	2014-2015
513	2012.42	HA1:262N	0.0023	2014.94794520548	MH8052	0.0301231869331	E	2014-2015
514	2012.5	HA1:262N	0.003	2014.94794520548	MH8052	0.0301231869331	E	2014-2015
515	2012.58	HA1:262N	0.0036	2014.94794520548	MH8052	0.0301231869331	E	2014-2015
516	2012.67	HA1:262N	0.0045	2014.94794520548	MH8052	0.0301231869331	E	2014-2015
517	2012.75	HA1:262N	0.0056	2014.94794520548	MH8052	0.0301231869331	E	2014-2015
518	2012.83	HA1:262N	0.0063	2014.94794520548	MH8052	0.0301231869331	E	2014-2015
519	2012.92	HA1:262N	0.0051	2014.94794520548	MH8052	0.0301231869331	E	2014-2015
520	2013	HA1:262N	0.0049	2014.94794520548	MH8052	0.0301231869331	E	2014-2015
521	2013.08	HA1:262N	0.0076	2014.94794520548	MH8052	0.0301231869331	E	2014-2015
522	2013.17	HA1:262N	0.0111	2014.94794520548	MH8052	0.0301231869331	E	2014-2015
523	2013.25	HA1:262N	0.0124	2014.94794520548	MH8052	0.0301231869331	E	2014-2015
524	2013.33	HA1:262N	0.0093	2014.94794520548	MH8052	0.0301231869331	E	2014-2015
525	2013.42	HA1:262N	0.0052	2014.94794520548	MH8052	0.0301231869331	E	2014-2015
526	2013.5	HA1:262N	0.0026	2014.94794520548	MH8052	0.0301231869331	E	2014-2015
527	2013.58	HA1:262N	0.0016	2014.94794520548	MH8052	0.0301231869331	E	2014-2015
528	2013.67	HA1:262N	0.0013	2014.94794520548	MH8052	0.0301231869331	E	2014-2015
529	2013.75	HA1:262N	0.0013	2014.94794520548	MH8052	0.0301231869331	E	2014-2015
530	2013.83	HA1:262N	0.0019	2014.94794520548	MH8052	0.0301231869331	E	2014-2015
531	2013.92	HA1:262N	0.0033	2014.94794520548	MH8052	0.0301231869331	E	2014-2015
532	2014	HA1:262N	0.0071	2014.94794520548	MH8052	0.0301231869331	E	2014-2015
533	2014.08	HA1:262N	0.0155	2014.94794520548	MH8052	0.0301231869331	E	2014-2015
534	2014.17	HA1:262N	0.0213	2014.94794520548	MH8052	0.0301231869331	E	2014-2015
535	2014.25	HA1:262N	0.0223	2014.94794520548	MH8052	0.0301231869331	E	2014-2015
536	2014.33	HA1:262N	0.0131	2014.94794520548	MH8052	0.0301231869331	E	2014-2015
537	2014.42	HA1:262N	0.0069	2014.94794520548	MH8052	0.0301231869331	E	2014-2015
538	2014.5	HA1:262N	0.0035	2014.94794520548	MH8052	0.0301231869331	E	2014-2015
539	2014.58	HA1:262N	0.003	2014.94794520548	MH8052	0.0301231869331	E	2014-2015
540	2014.67	HA1:262N	0.0039	2014.94794520548	MH8052	0.0301231869331	E	2014-2015
541	2014.75	HA1:262N	0.0056	2014.94794520548	MH8052	0.0301231869331	E	2014-2015
542	2014.83	HA1:262N	0.0044	2014.94794520548	MH8052	0.0301231869331	E	2014-2015
543	2014.92	HA1:262N	0.0026	2014.94794520548	MH8052	0.0301231869331	E	2014-2015
544	2015	HA1:262N	0.0029	2014.94794520548	MH8052	0.0301231869331	E	2014-2015
545	2015.08	HA1:262N	0.0041	2014.94794520548	MH8052	0.0301231869331	E	2014-2015
546	2015.17	HA1:262N	0.0054	2014.94794520548	MH8052	0.0301231869331	E	2014-2015
547	2015.25	HA1:262N	0.0071	2014.94794520548	MH8052	0.0301231869331	E	2014-2015
548	2015.33	HA1:262N	0.0084	2014.94794520548	MH8052	0.0301231869331	E	2014-2015
549	2015.42	HA1:262N	0.0106	2014.94794520548	MH8052	0.0301231869331	E	2014-2015
550	2015.5	HA1:262N	0.0146	2014.94794520548	MH8052	0.0301231869331	E	2014-2015
551	2015.58	HA1:262N	0.0179	2014.94794520548	MH8052	0.0301231869331	E	2014-2015
552	2015.67	HA1:262N	0.0222	2014.94794520548	MH8052	0.0301231869331	E	2014-2015
553	2015.75	HA1:262N	0.0223	2014.94794520548	MH8052	0.0301231869331	E	2014-2015
554	2015.83	HA1:262N	0.0157	2014.94794520548	MH8052	0.0301231869331	E	2014-2015
555	2015.92	HA1:262N	0.008	2014.94794520548	MH8052	0.0301231869331	E	2014-2015
556	2016	HA1:262N	0.004	2014.94794520548	MH8052	0.0301231869331	E	2014-2015
557	2016.08	HA1:262N	0.004	2014.94794520548	MH8052	0.0301231869331	E	2014-2015
558	2016.17	HA1:262N	0.0074	2014.94794520548	MH8052	0.0301231869331	E	2014-2015
559	2016.25	HA1:262N	0.0153	2014.94794520548	MH8052	0.0301231869331	E	2014-2015
560	2016.33	HA1:262N	0.0241	2014.94794520548	MH8052	0.0301231869331	E	2014-2015
561	2016.42	HA1:262N	0.0335	2014.94794520548	MH8052	0.0301231869331	E	2014-2015
562	2016.5	HA1:262N	0.0475	2014.94794520548	MH8052	0.0301231869331	E	2014-2015
563	2016.58	HA1:262N	0.0579	2014.94794520548	MH8052	0.0301231869331	E	2014-2015
564	2016.67	HA1:262N	0.0754	2014.94794520548	MH8052	0.0301231869331	E	2014-2015
565	2016.75	HA1:262N	0.0777	2014.94794520548	MH8052	0.0301231869331	E	2014-2015
566	2016.83	HA1:262N	0.0985	2014.94794520548	MH8052	0.0301231869331	E	2014-2015
567	2016.92	HA1:262N	0.1417	2014.94794520548	MH8052	0.0301231869331	E	2014-2015
568	2017	HA1:262N	0.1484	2014.94794520548	MH8052	0.0301231869331	E	2014-2015
569	2017.08	HA1:262N	0.1373	2014.94794520548	MH8052	0.0301231869331	E	2014-2015
570	2017.17	HA1:262N	0.1031	2014.94794520548	MH8052	0.0301231869331	E	2014-2015
571	2017.25	HA1:262N	0.0644	2014.94794520548	MH8052	0.0301231869331	E	2014-2015
572	2017.33	HA1:262N	0.0381	2014.94794520548	MH8052	0.0301231869331	E	2014-2015
573	2017.42	HA1:262N	0.0192	2014.94794520548	MH8052	0.0301231869331	E	2014-2015
574	2017.5	HA1:262N	0.0124	2014.94794520548	MH8052	0.0301231869331	E	2014-2015
575	2017.58	HA1:262N	0.0143	2014.94794520548	MH8052	0.0301231869331	E	2014-2015
576	2017.67	HA1:262N	0.0168	2014.94794520548	MH8052	0.0301231869331	E	2014-2015
577	2017.75	HA1:262N	0.0183	2014.94794520548	MH8052	0.0301231869331	E	2014-2015
578	2017.83	HA1:262N	0.0143	2014.94794520548	MH8052	0.0301231869331	E	2014-2015
579	2017.92	HA1:262N	0.0075	2014.94794520548	MH8052	0.0301231869331	E	2014-2015
580	2018	HA1:262N	0.001	2014.94794520548	MH8052	0.0301231869331	E	2014-2015
