# Supplementary material for: Stochastic processes constrain the within and between host evolution of influenza virus
Source: eLife journal article supplement (doi:10.7554/elife.35962), 2018-04-23
Supplement: supp [file elife-35962-supp-v1.zip › elife_poa_e35962_Figure_2_source_data_4.csv]

	ENROLLID	onset	within_host_time	day.post.sympotom.onset1	day.post.sympotom.onset2	sort_order
1	51359	2014-12-02	1	5	6	1
2	50305	2014-12-05	3	2	5	2
3	50993	2015-01-04	3	2	5	3
4	51106	2014-12-06	1	2	3	4
5	50167	2014-12-27	3	1	4	5
6	50232	2014-12-12	2	1	3	6
7	50141	2014-12-03	1	1	2	7
8	50143	2015-01-11	1	1	2	8
9	50418	2014-12-27	1	1	2	9
10	50785	2014-12-14	1	1	2	10
11	50809	2014-12-14	1	1	2	11
12	50968	2014-12-06	1	1	2	12
13	51046	2014-12-08	1	1	2	13
14	50120	2014-12-15	0	1	1.3	14
15	50482	2014-11-19	0	1	1.3	15
16	50618	2014-11-24	0	1	1.3	16
17	51097	2014-12-18	0	1	1.3	17
18	51101	2014-12-21	0	1	1.3	18
19	50001	2014-12-25	6	0	6	19
20	50003	2014-12-25	6	0	6	20
21	50246	2015-01-01	4	0	4	21
22	50318	2014-11-23	3	0	3	22
23	50540	2014-12-06	3	0	3	23
24	50678	2014-12-05	3	0	3	24
25	50935	2014-12-05	3	0	3	25
26	50468	2014-12-21	2	0	2	26
27	50620	2014-11-22	2	0	2	27
28	51000	2014-12-16	2	0	2	28
29	51055	2014-12-15	2	0	2	29
30	51073	2014-12-20	2	0	2	30
31	50207	2014-11-30	1	0	1	31
32	50319	2014-11-25	1	0	1	32
33	50331	2014-12-09	1	0	1	33
34	50553	2014-11-16	1	0	1	34
35	50727	2015-01-08	1	0	1	35
36	50812	2014-12-10	1	0	1	36
37	50842	2014-12-22	1	0	1	37
38	50874	2014-12-05	1	0	1	38
39	50969	2014-12-01	1	0	1	39
40	51059	2014-12-22	1	0	1	40
41	51438	2014-12-07	1	0	1	41
42	50619	2014-11-25	0	0	0.3	42
43	50538	2014-12-08	3	-2	1	43
