# Supplementary material for: Stochastic processes constrain the within and between host evolution of influenza virus
Source: eLife journal article supplement (doi:10.7554/elife.35962), 2018-04-23
Supplement: supp [file elife-35962-supp-v1.zip › elife_poa_e35962_Figure_2_source_data_5.csv]

	mutation	ENROLLID	DPS1	DPS2	freq1	freq2
1	PA_G292A	50001	0	6	0.088459720965	0
2	PB2_G1099A	50001	0	6	0.0999685429417	0
3	PA_A1848A	50003	0	6	0	0.12118464793
4	PB1_G1852A	50003	0	6	0	0.0428052289357
5	NP_G1132G	50120	1	1	0.308590466108	0.330987717503
6	PB2_A2113G	50120	1	1	0.32950278905	0.333314318553
7	HA_C236A	50141	1	2	0.0251913260241	0
8	HA_G564A	50141	1	2	0	0.0321867371234
9	HA_A1011G	50141	1	2	0.0234583211453	0
10	HA_G1025A	50141	1	2	0	0.0247380531631
11	NS_A652G	50141	1	2	0.0205565019974	0
12	HA_G997G	50143	1	2	0.118965758211	0.160588985754
13	PA_G916A	50143	1	2	0.0475818807204	0.0365481131744
14	PB2_G1085A	50143	1	2	0.0371576898886	0.0598420993163
15	HA_T491C	50167	1	4	0.287317227262	0
16	PA_T1551C	50167	1	4	0	0.0244930994171
17	HA_G1670A	50207	0	1	0.0289438607466	0.0349313418453
18	PA_G1175A	50207	0	1	0	0.0230061114999
19	PB1_C1108T	50207	0	1	0	0.0409793687369
20	PB1_C1213T	50207	0	1	0	0.022613500316
21	PB2_A587G	50207	0	1	0	0.0286562213244
22	PB2_C897T	50207	0	1	0	0.0293899721004
23	PB2_A1893T	50207	0	1	0.0552275151719	0
24	M_T721C	50232	1	3	0	0.0755530848731
25	NS_A140A	50232	1	3	0	0.0764177797241
26	NS_T173T	50232	1	3	0	0.0802175390891
27	NS_T440G	50232	1	3	0	0.0241244183161
28	PA_C180C	50232	1	3	0	0.0230176211454
29	PA_C552A	50232	1	3	0	0.0224108822864
30	PA_G807G	50232	1	3	0	0.0241789623989
31	PA_T1014C	50232	1	3	0	0.0235300535364
32	PA_A1605A	50232	1	3	0	0.0262236164834
33	PB1_G538A	50232	1	3	0	0.0223448876923
34	PB1_G650G	50232	1	3	0	0.0261827823349
35	PB1_A884A	50232	1	3	0	0.0219176859209
36	PB1_C1030C	50232	1	3	0	0.0220879913451
37	PB1_C1345T	50232	1	3	0	0.0621787009043
38	PB1_C1820C	50232	1	3	0	0.0222056107642
39	HA_G866C	50246	0	4	0	0.055754576684
40	M_A755C	50246	0	4	0	0.549565940635
41	NP_C912T	50246	0	4	0.0238459160993	0
42	NR_G1011T	50246	0	4	0	0.0406584010261
43	PA_T346C	50246	0	4	0	0.0548465106995
44	PA_G363A	50246	0	4	0	0.0568473674904
45	PB1_T1381C	50246	0	4	0.220612391464	0.278668534015
46	PB2_G1353A	50246	0	4	0	0.0462796586636
47	HA_C273T	50305	2	5	0.0511608590998	0
48	NP_C402T	50305	2	5	0	0.0537544777979
49	NP_A1011A	50305	2	5	0.272598938811	0.67699981639
50	NR_A250G	50305	2	5	0	0.271666666667
51	NS_T77C	50305	2	5	0	0.0201493318979
52	HA_G1463A	50318	0	3	0	0.0439763850454
53	NP_G207G	50318	0	3	0.023682486193	0
54	NP_C1362T	50318	0	3	0	0.0412810234528
55	PB1_A877G	50318	0	3	0.0208654028168	0
56	PB1_A985C	50318	0	3	0.0579359438968	0
57	PB2_T1713C	50318	0	3	0	0.0315621488869
58	HA_A140G	50319	0	1	0.0264987958706	0.0498634992657
59	PB2_C880T	50319	0	1	0.0360841803356	0
60	NP_C1334T	50331	0	1	0.0293693096763	0.0545497547818
61	PA_A384G	50331	0	1	0	0.0517465143171
62	NR_G1099C	50418	1	2	0.0364039850796	0.0305729417429
63	PB1_T1837C	50418	1	2	0	0.0305646799297
64	PB1_G1900A	50418	1	2	0.0282897855058	0
65	PB2_G2245A	50418	1	2	0	0.0510015862057
66	HA_G1019A	50468	0	2	0.0451690779046	0
67	PB2_T1617C	50468	0	2	0	0.0238997683461
68	HA_G948A	50482	1	1	0.048947720117	0
69	NP_T273C	50482	1	1	0.0732036364348	0.0351737311541
70	PB2_T2055C	50482	1	1	0.0575796758126	0
71	NR_T168C	50538	-2	1	0.0532737376178	0
72	NR_T174C	50538	-2	1	0.0495013829969	0.103353285093
73	NR_T204C	50538	-2	1	0.0537203647876	0.105418555052
74	NR_T220C	50538	-2	1	0.0457585470085	0.0944041703999
75	NR_T221C	50538	-2	1	0.0490578075375	0.1011110223
76	NR_T249C	50538	-2	1	0.0589176907983	0.104666794699
77	NS_A169C	50538	-2	1	0.399660203475	0.382374742032
78	HA_C545T	50540	0	3	0.0680510202664	0.18189226088
79	PA_G348A	50540	0	3	0	0.0300537980878
80	HA_C995T	50553	0	1	0.0380427122411	0.087795844906
81	NP_T723C	50553	0	1	0.0353873297077	0.0536324531095
82	PB1_G1822A	50553	0	1	0.0374481830523	0.0208268208572
83	PA_G1701G	50618	1	1	0	0.0333324322132
84	PA_G1701A	50619	0	0	0.0395296954463	0.0461136587657
85	PA_G1701A	50620	0	2	0.230503852869	0.523499257414
86	HA_A1049G	50678	0	3	0	0.0914239163906
87	PB1_T571C	50727	0	1	0	0.0259449381869
88	PB1_G1741A	50727	0	1	0.0267897579618	0.0245798938441
89	NS_G287A	50785	1	2	0	0.037064665189
90	NP_A295G	50809	1	2	0	0.0282610972159
91	PB1_C463T	50812	0	1	0.0868394479973	0.0748051062923
92	PB1_A1204G	50812	0	1	0.0245627983103	0
93	NS_G687A	50842	0	1	0.0681319007211	0.0292183267245
94	HA_A1486T	50874	0	1	0.103900854115	0
95	NR_A501G	50874	0	1	0.0331706001001	0.467637282551
96	PB1_G530A	50874	0	1	0.25351760292	0.473359560691
97	PB1_A1705G	50874	0	1	0.296343011523	0.461350779373
98	PB1_G1798G	50874	0	1	0.178816730614	0.443234092666
99	PB2_G212A	50874	0	1	0.302404459968	0.470121801684
100	HA_T655C	50935	0	3	0	0.174562543218
101	HA_A879C	50968	1	2	0.0341160572648	0
102	PA_T984C	50968	1	2	0	0.0217852295444
103	PB1_A577G	50968	1	2	0	0.0827635346589
104	PB2_G1785A	50968	1	2	0	0.0318535602867
105	PA_A519G	50969	0	1	0.0259055480325	0
106	PA_G1201A	50969	0	1	0	0.0250320272215
107	PA_A1202G	50969	0	1	0	0.029538641251
108	HA_C418T	50993	2	5	0.0315552982759	0
109	M_T303C	50993	2	5	0.0309374082531	0
110	NR_G604A	50993	2	5	0	0.0211669597951
111	NS_G441A	50993	2	5	0	0.0272112598053
112	PA_A1795G	50993	2	5	0.102067566964	0
113	PB1_G1558T	50993	2	5	0.0243697569459	0
114	PB1_C2104T	50993	2	5	0	0.0437288398798
115	PB2_A872T	50993	2	5	0	0.0289518870615
116	PB2_G1099A	50993	2	5	0.0383825176499	0
117	HA_T1526A	51000	0	2	0	0.0414573346808
118	NR_T959C	51000	0	2	0	0.0397616975701
119	PA_T1065C	51000	0	2	0.0233691677076	0
120	NP_G942A	51046	1	2	0.208095813744	0.0977810655399
121	HA_C1274T	51055	0	2	0	0.0449178280835
122	M_T214C	51055	0	2	0	0.418167542072
123	M_A559A	51055	0	2	0	0.0312107008117
124	NS_A453G	51055	0	2	0.147829492147	0
125	PB2_G1626A	51055	0	2	0	0.0817615627157
126	PB2_G2007A	51055	0	2	0	0.0345706494099
127	M_G553A	51059	0	1	0.0897057347185	0.0328200308996
128	PA_G1611A	51059	0	1	0	0.0514282128035
129	PB1_T910A	51073	0	2	0.340472493385	0.0421432505725
130	NP_G300A	51097	1	1	0.05031166427	0.0270648583852
131	NP_A1276G	51097	1	1	0.0248815074902	0
132	NR_G700A	51097	1	1	0.0282006488645	0.0378279094117
133	PA_A2052G	51097	1	1	0.044689039701	0.0455709195935
134	NS_G441A	51101	1	1	0.0227637263668	0.0214906940287
135	NS_A729G	51101	1	1	0.471282989773	0.458902519072
136	PA_C258T	51101	1	1	0.457058670595	0.434210292636
137	PA_A1467A	51101	1	1	0.46149376175	0.448453608247
138	PB1_A1621G	51101	1	1	0.0356033123119	0.0289830648868
139	PB2_G484A	51101	1	1	0.0380963841513	0.0436740299109
140	PB2_T528C	51101	1	1	0.0223344929805	0
141	HA_A459G	51106	2	3	0	0.110522479152
142	NP_T735T	51106	2	3	0	0.0429205601746
143	NP_C1407A	51106	2	3	0	0.0432148926624
144	NR_T452C	51106	2	3	0	0.024604648721
145	NS_A140G	51106	2	3	0	0.0329920540903
146	NS_T173A	51106	2	3	0	0.0310390335634
147	NS_G233G	51106	2	3	0	0.0322513524761
148	PB1_G650A	51106	2	3	0	0.029230595902
149	PB1_C1109C	51106	2	3	0	0.0268645421677
150	NP_A306G	51359	5	6	0	0.0262084144851
151	HA_T524C	51438	0	1	0.0588456364788	0.489384735077
152	HA_G638A	51438	0	1	0.213904415309	0.0359769154235
153	NP_A914G	51438	0	1	0	0.0432845476875
154	NS_T538C	51438	0	1	0.0487008376097	0.48757896261
155	PA_C927T	51438	0	1	0.0922304890917	0.0779471069765
156	PB1_G430A	51438	0	1	0.220772809253	0.0396486125248
