# Supplementary material for: Stochastic processes constrain the within and between host evolution of influenza virus
Source: eLife journal article supplement (doi:10.7554/elife.35962), 2018-04-23
Supplement: supp [file elife-35962-supp-v1.zip › elife_poa_e35962_Figure_3_figure_supplement_1.pdf]

Figure 3-figure supplement 1

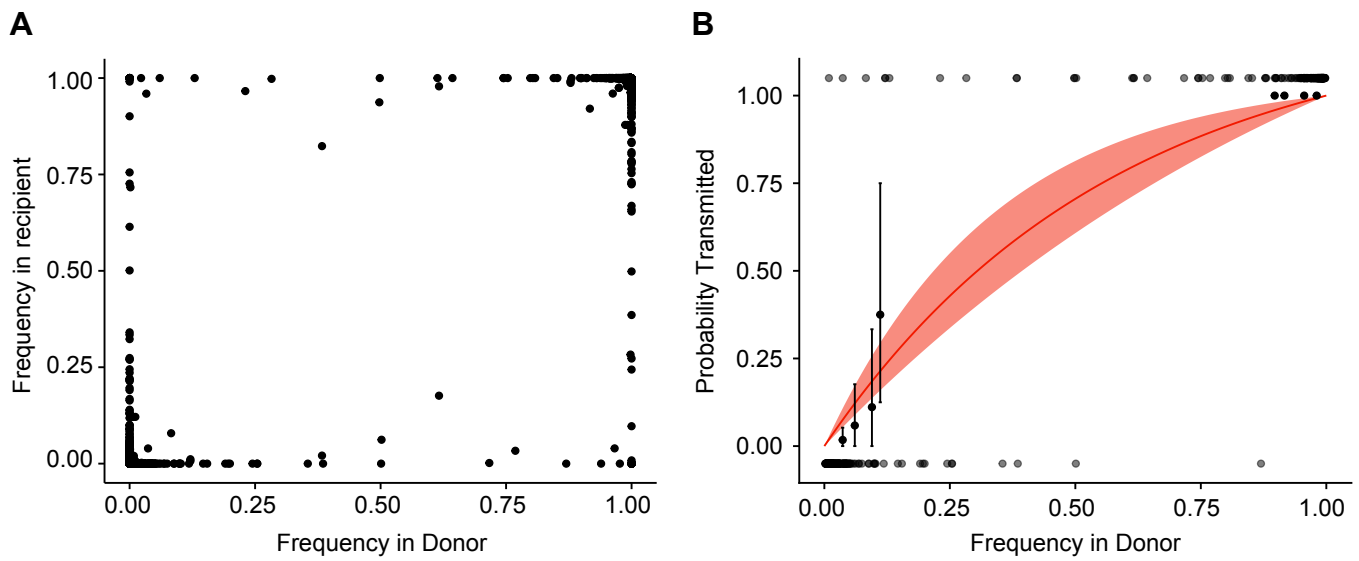

Figure 3-figure supplement 1. Estimate of effective bottleneck size with relaxed variant calling criteria. (A) The frequency of iSNV in both recipient and donor isolates. iSNV were identified using the original variant calling pipeline as in (McCrone & Lauring 2016). (B) The presence-absence model fit as in Figure 3D with relaxed variant calling.
