# Supplementary material for: Stochastic processes constrain the within and between host evolution of influenza virus
Source: eLife journal article supplement (doi:10.7554/elife.35962), 2018-04-23
Supplement: supp [file elife-35962-supp-v1.zip › elife_poa_e35962_Figure_3_source_data_1.csv]

	season	SPECID1	SPECID2	L1_norm	valid	Household
1	2010-2011	M54206	M54205	1.6540945139619	TRUE	TRUE
2	2010-2011	M53523	M54205	214.774624506324	FALSE	FALSE
3	2010-2011	M54062	M54205	100.780940531051	FALSE	FALSE
4	2010-2011	M53523	M54206	216.182271396444	FALSE	FALSE
5	2010-2011	M54062	M54206	102.435035045013	FALSE	FALSE
6	2010-2011	M54206	M54207	2.064553815309	TRUE	TRUE
7	2010-2011	M53523	M54207	217.228131812123	FALSE	FALSE
8	2010-2011	M54062	M54207	103.480895460692	FALSE	FALSE
9	2010-2011	M53523	M54062	233.849863917549	FALSE	FALSE
10	2010-2011	M54586	M54585	3.13856751422	TRUE	TRUE
11	2010-2011	M53769	M54585	348.412227714818	FALSE	FALSE
12	2010-2011	M54369	M54585	94.0596870289715	FALSE	FALSE
13	2010-2011	M53302	M54585	100.574539248234	FALSE	FALSE
14	2010-2011	M54375	M54585	106.327603028062	FALSE	FALSE
15	2010-2011	M54374	M54585	105.93476719915	FALSE	FALSE
16	2010-2011	M54053	M54585	107.93476719915	FALSE	FALSE
17	2010-2011	M54310	M54585	97.9347671991505	FALSE	FALSE
18	2010-2011	M54181	M54585	92.1620622766498	FALSE	FALSE
19	2010-2011	M53671	M54585	95.4535892481681	FALSE	FALSE
20	2010-2011	M53672	M54585	94.0241157260342	FALSE	FALSE
21	2010-2011	M53769	M54586	347.681260830737	FALSE	FALSE
22	2010-2011	M54369	M54586	93.3287201448905	FALSE	FALSE
23	2010-2011	M53302	M54586	99.8435723641531	FALSE	FALSE
24	2010-2011	M54375	M54586	105.596636143981	FALSE	FALSE
25	2010-2011	M54374	M54586	105.203800315069	FALSE	FALSE
26	2010-2011	M54053	M54586	107.20380031507	FALSE	FALSE
27	2010-2011	M54310	M54586	97.2038003150695	FALSE	FALSE
28	2010-2011	M54181	M54586	91.4310953925688	FALSE	FALSE
29	2010-2011	M53671	M54586	94.7226223640871	FALSE	FALSE
30	2010-2011	M53672	M54586	93.2931488419532	FALSE	FALSE
31	2010-2011	M53302	M53769	333.117232564751	FALSE	FALSE
32	2010-2011	M53671	M53769	327.996282564685	FALSE	FALSE
33	2010-2011	M53672	M53769	326.566809042551	FALSE	FALSE
34	2010-2011	M54585	M54913	108.608488573783	FALSE	FALSE
35	2010-2011	M54586	M54913	107.877521689702	FALSE	FALSE
36	2010-2011	M53769	M54913	337.1511818903	FALSE	FALSE
37	2010-2011	M54369	M54913	86.7986412044537	FALSE	FALSE
38	2010-2011	M54659	M54913	90.937191199797	FALSE	FALSE
39	2010-2011	M54805	M54913	108.931822722993	FALSE	FALSE
40	2010-2011	M54791	M54913	438.845487745196	FALSE	FALSE
41	2010-2011	M53302	M54913	101.313493423716	FALSE	FALSE
42	2010-2011	M54375	M54913	51.0665572035447	FALSE	FALSE
43	2010-2011	M54374	M54913	50.6737213746327	FALSE	FALSE
44	2010-2011	M54053	M54913	112.673721374633	FALSE	FALSE
45	2010-2011	M54580	M54913	106.769424269113	FALSE	FALSE
46	2010-2011	M54310	M54913	90.6737213746327	FALSE	FALSE
47	2010-2011	M54181	M54913	36.901016452132	FALSE	FALSE
48	2010-2011	M54724	M54913	93.4137546412751	FALSE	FALSE
49	2010-2011	M54726	M54913	94.1147251915757	FALSE	FALSE
50	2010-2011	M53671	M54913	88.1925434236503	FALSE	FALSE
51	2010-2011	M53672	M54913	86.7630699015164	FALSE	FALSE
52	2010-2011	M54585	M55001	348.117399526031	FALSE	FALSE
53	2010-2011	M54586	M55001	347.38643264195	FALSE	FALSE
54	2010-2011	M53769	M55001	198.446564767805	FALSE	FALSE
55	2010-2011	M54913	M55001	336.995980833605	FALSE	FALSE
56	2010-2011	M54659	M55001	324.661260190795	FALSE	FALSE
57	2010-2011	M54805	M55001	348.440733675241	FALSE	FALSE
58	2010-2011	M54791	M55001	398.354398697444	FALSE	FALSE
59	2010-2011	M53302	M55001	332.822404375964	FALSE	FALSE
60	2010-2011	M54375	M55001	334.715095287884	FALSE	FALSE
61	2010-2011	M54374	M55001	334.322259458972	FALSE	FALSE
62	2010-2011	M54053	M55001	348.182632326881	FALSE	FALSE
63	2010-2011	M54580	M55001	346.278335221361	FALSE	FALSE
64	2010-2011	M54310	M55001	330.182632326881	FALSE	FALSE
65	2010-2011	M54181	M55001	320.549554536471	FALSE	FALSE
66	2010-2011	M54724	M55001	328.922665593523	FALSE	FALSE
67	2010-2011	M54726	M55001	330.741628509938	FALSE	FALSE
68	2010-2011	M53671	M55001	327.701454375898	FALSE	FALSE
69	2010-2011	M53672	M55001	326.271980853764	FALSE	FALSE
70	2010-2011	M53769	M54369	326.602380345488	FALSE	FALSE
71	2010-2011	M53302	M54369	82.7646918789046	FALSE	FALSE
72	2010-2011	M54053	M54369	78.124919829821	FALSE	FALSE
73	2010-2011	M54310	M54369	12.124919829821	FALSE	FALSE
74	2010-2011	M54181	M54369	70.3522149073203	FALSE	FALSE
75	2010-2011	M53671	M54369	5.6437418788386	FALSE	FALSE
76	2010-2011	M53672	M54369	4.2142683567047	FALSE	FALSE
77	2010-2011	M54585	M54659	98.1982370243148	FALSE	FALSE
78	2010-2011	M54586	M54659	97.4672701402338	FALSE	FALSE
79	2010-2011	M53769	M54659	328.956088379581	FALSE	FALSE
80	2010-2011	M54369	M54659	40.3883896549853	FALSE	FALSE
81	2010-2011	M53302	M54659	86.9032418742479	FALSE	FALSE
82	2010-2011	M54375	M54659	88.6563056540763	FALSE	FALSE
83	2010-2011	M54374	M54659	88.2634698251643	FALSE	FALSE
84	2010-2011	M54053	M54659	82.2634698251643	FALSE	FALSE
85	2010-2011	M54580	M54659	96.3591727196447	FALSE	FALSE
86	2010-2011	M54310	M54659	44.2634698251643	FALSE	FALSE
87	2010-2011	M54181	M54659	74.4907649026636	FALSE	FALSE
88	2010-2011	M53671	M54659	41.7822918741819	FALSE	FALSE
89	2010-2011	M53672	M54659	40.352818352048	FALSE	FALSE
90	2010-2011	M54585	M54805	4.1928685475104	FALSE	FALSE
91	2010-2011	M54586	M54805	3.4619016634294	FALSE	FALSE
92	2010-2011	M53769	M54805	348.735561864027	FALSE	FALSE
93	2010-2011	M54369	M54805	94.3830211781809	FALSE	FALSE
94	2010-2011	M54659	M54805	98.5215711735242	FALSE	FALSE
95	2010-2011	M53302	M54805	100.897873397444	FALSE	FALSE
96	2010-2011	M54375	M54805	106.650937177272	FALSE	FALSE
97	2010-2011	M54374	M54805	106.25810134836	FALSE	FALSE
98	2010-2011	M54053	M54805	108.25810134836	FALSE	FALSE
99	2010-2011	M54580	M54805	2.3538042428403	FALSE	FALSE
100	2010-2011	M54310	M54805	98.2581013483599	FALSE	FALSE
101	2010-2011	M54181	M54805	92.4853964258592	FALSE	FALSE
102	2010-2011	M54724	M54805	100.998134615002	FALSE	FALSE
103	2010-2011	M54726	M54805	102.817097531417	FALSE	FALSE
104	2010-2011	M53671	M54805	95.7769233973775	FALSE	FALSE
105	2010-2011	M53672	M54805	94.3474498752436	FALSE	FALSE
106	2010-2011	M54585	M54791	440.106533569714	FALSE	FALSE
107	2010-2011	M54586	M54791	439.375566685633	FALSE	FALSE
108	2010-2011	M53769	M54791	400.64922688623	FALSE	FALSE
109	2010-2011	M54369	M54791	424.296686200384	FALSE	FALSE
110	2010-2011	M54659	M54791	422.650394234478	FALSE	FALSE
111	2010-2011	M53302	M54791	422.811538419647	FALSE	FALSE
112	2010-2011	M54375	M54791	427.778930541651	FALSE	FALSE
113	2010-2011	M54374	M54791	428.171766370563	FALSE	FALSE
114	2010-2011	M54053	M54791	440.171766370563	FALSE	FALSE
115	2010-2011	M54580	M54791	438.267469265044	FALSE	FALSE
116	2010-2011	M54310	M54791	426.171766370563	FALSE	FALSE
117	2010-2011	M54181	M54791	422.399061448063	FALSE	FALSE
118	2010-2011	M54724	M54791	426.911799637206	FALSE	FALSE
119	2010-2011	M54726	M54791	428.73076255362	FALSE	FALSE
120	2010-2011	M53671	M54791	425.690588419581	FALSE	FALSE
121	2010-2011	M53672	M54791	424.261114897447	FALSE	FALSE
122	2010-2011	M53769	M54375	338.870296344579	FALSE	FALSE
123	2010-2011	M53302	M54375	99.0326078779956	FALSE	FALSE
124	2010-2011	M54053	M54375	110.392835828912	FALSE	FALSE
125	2010-2011	M54310	M54375	88.392835828912	FALSE	FALSE
126	2010-2011	M54181	M54375	34.6201309064113	FALSE	FALSE
127	2010-2011	M53671	M54375	85.9116578779296	FALSE	FALSE
128	2010-2011	M53672	M54375	84.4821843557957	FALSE	FALSE
129	2010-2011	M53769	M54374	338.477460515667	FALSE	FALSE
130	2010-2011	M54369	M54374	84.124919829821	FALSE	FALSE
131	2010-2011	M53302	M54374	98.6397720490836	FALSE	FALSE
132	2010-2011	M54375	M54374	0.392835828912	TRUE	TRUE
133	2010-2011	M54053	M54374	110	FALSE	FALSE
134	2010-2011	M54310	M54374	88	FALSE	FALSE
135	2010-2011	M54181	M54374	34.2272950774993	FALSE	FALSE
136	2010-2011	M53671	M54374	85.5188220490176	FALSE	FALSE
137	2010-2011	M53672	M54374	84.0893485268837	FALSE	FALSE
138	2010-2011	M53769	M54053	348.477460515667	FALSE	FALSE
139	2010-2011	M53302	M54053	96.6397720490836	FALSE	FALSE
140	2010-2011	M53671	M54053	79.5188220490176	FALSE	FALSE
141	2010-2011	M53672	M54053	78.0893485268837	FALSE	FALSE
142	2010-2011	M54585	M54580	2.0304700936309	FALSE	FALSE
143	2010-2011	M54586	M54580	1.2995032095499	FALSE	FALSE
144	2010-2011	M53769	M54580	346.573163410147	FALSE	FALSE
145	2010-2011	M54369	M54580	92.2206227243014	FALSE	FALSE
146	2010-2011	M53302	M54580	98.735474943564	FALSE	FALSE
147	2010-2011	M54375	M54580	104.488538723392	FALSE	FALSE
148	2010-2011	M54374	M54580	104.09570289448	FALSE	FALSE
149	2010-2011	M54053	M54580	106.09570289448	FALSE	FALSE
150	2010-2011	M54310	M54580	96.0957028944804	FALSE	FALSE
151	2010-2011	M54181	M54580	90.3229979719797	FALSE	FALSE
152	2010-2011	M53671	M54580	93.614524943498	FALSE	FALSE
153	2010-2011	M53672	M54580	92.1850514213641	FALSE	FALSE
154	2010-2011	M53769	M54310	330.477460515667	FALSE	FALSE
155	2010-2011	M53302	M54310	86.6397720490836	FALSE	FALSE
156	2010-2011	M54053	M54310	82	FALSE	FALSE
157	2010-2011	M54181	M54310	74.2272950774993	FALSE	FALSE
158	2010-2011	M53671	M54310	13.5188220490176	FALSE	FALSE
159	2010-2011	M53672	M54310	12.0893485268837	FALSE	FALSE
160	2010-2011	M53769	M54181	324.704755593166	FALSE	FALSE
161	2010-2011	M53302	M54181	84.8670671265829	FALSE	FALSE
162	2010-2011	M54053	M54181	96.2272950774993	FALSE	FALSE
163	2010-2011	M53671	M54181	71.7461171265169	FALSE	FALSE
164	2010-2011	M53672	M54181	70.316643604383	FALSE	FALSE
165	2010-2011	M54585	M54724	100.674800465793	FALSE	FALSE
166	2010-2011	M54586	M54724	99.9438335817119	FALSE	FALSE
167	2010-2011	M53769	M54724	333.217493782309	FALSE	FALSE
168	2010-2011	M54369	M54724	42.8649530964634	FALSE	FALSE
169	2010-2011	M54659	M54724	7.0035030918067	FALSE	FALSE
170	2010-2011	M53302	M54724	89.379805315726	FALSE	FALSE
171	2010-2011	M54375	M54724	91.1328690955544	FALSE	FALSE
172	2010-2011	M54374	M54724	90.7400332666424	FALSE	FALSE
173	2010-2011	M54053	M54724	84.7400332666424	FALSE	FALSE
174	2010-2011	M54580	M54724	98.8357361611228	FALSE	FALSE
175	2010-2011	M54310	M54724	46.7400332666424	FALSE	FALSE
176	2010-2011	M54181	M54724	76.9673283441417	FALSE	FALSE
177	2010-2011	M53671	M54724	44.25885531566	FALSE	FALSE
178	2010-2011	M53672	M54724	42.8293817935261	FALSE	FALSE
179	2010-2011	M54585	M54726	102.493763382208	FALSE	FALSE
180	2010-2011	M54586	M54726	101.762796498127	FALSE	FALSE
181	2010-2011	M53769	M54726	335.036456698724	FALSE	FALSE
182	2010-2011	M54369	M54726	44.683916012878	FALSE	FALSE
183	2010-2011	M54659	M54726	8.8224660082213	FALSE	FALSE
184	2010-2011	M53302	M54726	91.1987682321406	FALSE	FALSE
185	2010-2011	M54375	M54726	91.833839645855	FALSE	FALSE
186	2010-2011	M54374	M54726	91.441003816943	FALSE	FALSE
187	2010-2011	M54053	M54726	86.558996183057	FALSE	FALSE
188	2010-2011	M54580	M54726	100.654699077537	FALSE	FALSE
189	2010-2011	M54310	M54726	48.558996183057	FALSE	FALSE
190	2010-2011	M54181	M54726	77.6682988944423	FALSE	FALSE
191	2010-2011	M53671	M54726	46.0778182320746	FALSE	FALSE
192	2010-2011	M53672	M54726	44.6483447099407	FALSE	FALSE
193	2010-2011	M53302	M53671	84.1585940981012	FALSE	FALSE
194	2010-2011	M53302	M53672	82.7291205759673	FALSE	FALSE
195	2011-2012	MH0495	MH0728	26.535339702675	FALSE	FALSE
196	2011-2012	MH0728	MH0922	220.587492669566	FALSE	FALSE
197	2011-2012	MH0495	MH0922	226.467457476579	FALSE	FALSE
198	2011-2012	MH0778	MH0922	217.169983967117	FALSE	FALSE
199	2011-2012	MH0728	MH1782	434.327687447831	FALSE	FALSE
200	2011-2012	MH0922	MH1782	469.975949000076	FALSE	FALSE
201	2011-2012	MH0495	MH1782	440.207652254844	FALSE	FALSE
202	2011-2012	MH1346	MH1782	431.220336968051	FALSE	FALSE
203	2011-2012	MH0778	MH1782	430.910178745382	FALSE	FALSE
204	2011-2012	MH1205	MH1782	427.953853955375	FALSE	FALSE
205	2011-2012	MH0728	MH1346	93.5480244158821	FALSE	FALSE
206	2011-2012	MH0922	MH1346	213.480142189786	FALSE	FALSE
207	2011-2012	MH0495	MH1346	99.4279892228951	FALSE	FALSE
208	2011-2012	MH0778	MH1346	90.1305157134331	FALSE	FALSE
209	2011-2012	MH1205	MH1346	7.1741909234265	TRUE	TRUE
210	2011-2012	MH0728	MH0778	13.237866193213	FALSE	FALSE
211	2011-2012	MH0495	MH0778	23.117831000226	FALSE	FALSE
212	2011-2012	MH0728	MH1205	90.2815414032064	FALSE	FALSE
213	2011-2012	MH0922	MH1205	218.21365917711	FALSE	FALSE
214	2011-2012	MH0495	MH1205	96.1615062102194	FALSE	FALSE
215	2011-2012	MH0778	MH1205	86.8640327007574	FALSE	FALSE
216	2012-2013	MH2527	MH2616	512.367560533162	FALSE	FALSE
217	2012-2013	MH2516	MH2616	514.466024285038	FALSE	FALSE
218	2012-2013	MH2466	MH2616	100.382019016397	FALSE	FALSE
219	2012-2013	MH2362	MH2616	98.9683671834265	FALSE	FALSE
220	2012-2013	MH2364	MH2616	98.1436502911875	FALSE	FALSE
221	2012-2013	MH2447	MH2616	57.9079034874086	FALSE	FALSE
222	2012-2013	MH2448	MH2616	116.112380983341	FALSE	FALSE
223	2012-2013	MH2365	MH2616	114.065831286882	FALSE	FALSE
224	2012-2013	MH2436	MH2616	97.4650775472229	FALSE	FALSE
225	2012-2013	MH2382	MH2616	96.4955163331199	FALSE	FALSE
226	2012-2013	MH2530	MH2616	34	FALSE	FALSE
227	2012-2013	MH2497	MH2616	98.3661499308142	FALSE	FALSE
228	2012-2013	MH2516	MH2527	6.8335848181993	FALSE	FALSE
229	2012-2013	MH2466	MH2527	514.749579549558	FALSE	FALSE
230	2012-2013	MH2362	MH2527	513.335927716588	FALSE	FALSE
231	2012-2013	MH2364	MH2527	512.511210824349	FALSE	FALSE
232	2012-2013	MH2447	MH2527	502.459657045753	FALSE	FALSE
233	2012-2013	MH2448	MH2527	504.479941516502	FALSE	FALSE
234	2012-2013	MH2365	MH2527	528.652951224929	FALSE	FALSE
235	2012-2013	MH2436	MH2527	511.562172938496	FALSE	FALSE
236	2012-2013	MH2382	MH2527	510.863076866281	FALSE	FALSE
237	2012-2013	MH2530	MH2527	512.367560533162	FALSE	FALSE
238	2012-2013	MH2497	MH2527	512.733710463976	FALSE	FALSE
239	2012-2013	MH2616	MH3270	39.511264412176	FALSE	FALSE
240	2012-2013	MH2527	MH3270	515.878824945338	FALSE	FALSE
241	2012-2013	MH3061	MH3270	1.511264412176	TRUE	TRUE
242	2012-2013	MH2516	MH3270	517.977288697214	FALSE	FALSE
243	2012-2013	MH2466	MH3270	107.893283428573	FALSE	FALSE
244	2012-2013	MH2706	MH3270	146.996624988649	FALSE	FALSE
245	2012-2013	MH2362	MH3270	106.479631595602	FALSE	FALSE
246	2012-2013	MH2364	MH3270	105.654914703364	FALSE	FALSE
247	2012-2013	MH2447	MH3270	61.4191678995846	FALSE	FALSE
248	2012-2013	MH2448	MH3270	119.623645395517	FALSE	FALSE
249	2012-2013	MH2863	MH3270	111.562245477926	FALSE	FALSE
250	2012-2013	MH2365	MH3270	121.577095699058	FALSE	FALSE
251	2012-2013	MH3208	MH3270	37.5649931655634	FALSE	FALSE
252	2012-2013	MH2810	MH3270	111.228889882636	FALSE	FALSE
253	2012-2013	MH2436	MH3270	104.976341959399	FALSE	FALSE
254	2012-2013	MH2737	MH3270	147.925475497434	FALSE	FALSE
255	2012-2013	MH2382	MH3270	104.006780745296	FALSE	FALSE
256	2012-2013	MH2530	MH3270	37.511264412176	FALSE	FALSE
257	2012-2013	MH2942	MH3270	529.55599870014	FALSE	FALSE
258	2012-2013	MH2497	MH3270	105.87741434299	FALSE	FALSE
259	2012-2013	MH2616	MH3061	38	FALSE	FALSE
260	2012-2013	MH2527	MH3061	514.367560533162	FALSE	FALSE
261	2012-2013	MH2516	MH3061	516.466024285038	FALSE	FALSE
262	2012-2013	MH2466	MH3061	106.382019016397	FALSE	FALSE
263	2012-2013	MH2706	MH3061	145.485360576473	FALSE	FALSE
264	2012-2013	MH2362	MH3061	104.968367183426	FALSE	FALSE
265	2012-2013	MH2364	MH3061	104.143650291187	FALSE	FALSE
266	2012-2013	MH2447	MH3061	59.9079034874086	FALSE	FALSE
267	2012-2013	MH2448	MH3061	118.112380983341	FALSE	FALSE
268	2012-2013	MH2863	MH3061	110.05098106575	FALSE	FALSE
269	2012-2013	MH2365	MH3061	120.065831286882	FALSE	FALSE
270	2012-2013	MH2810	MH3061	109.71762547046	FALSE	FALSE
271	2012-2013	MH2436	MH3061	103.465077547223	FALSE	FALSE
272	2012-2013	MH2737	MH3061	146.414211085258	FALSE	FALSE
273	2012-2013	MH2382	MH3061	102.49551633312	FALSE	FALSE
274	2012-2013	MH2530	MH3061	36	FALSE	FALSE
275	2012-2013	MH2942	MH3061	528.044734287963	FALSE	FALSE
276	2012-2013	MH2497	MH3061	104.366149930814	FALSE	FALSE
277	2012-2013	MH2466	MH2516	516.848043301435	FALSE	FALSE
278	2012-2013	MH2362	MH2516	515.434391468464	FALSE	FALSE
279	2012-2013	MH2364	MH2516	514.609674576225	FALSE	FALSE
280	2012-2013	MH2447	MH2516	504.558120797629	FALSE	FALSE
281	2012-2013	MH2448	MH2516	506.578405268379	FALSE	FALSE
282	2012-2013	MH2365	MH2516	530.751414976805	FALSE	FALSE
283	2012-2013	MH2436	MH2516	513.660636690372	FALSE	FALSE
284	2012-2013	MH2382	MH2516	512.961540618158	FALSE	FALSE
285	2012-2013	MH2497	MH2516	514.832174215852	FALSE	FALSE
286	2012-2013	MH2362	MH2466	7.3503861998234	FALSE	FALSE
287	2012-2013	MH2364	MH2466	6.5256693075844	FALSE	FALSE
288	2012-2013	MH2447	MH2466	90.4741155289883	FALSE	FALSE
289	2012-2013	MH2448	MH2466	116.494399999738	FALSE	FALSE
290	2012-2013	MH2365	MH2466	50.6674097081641	FALSE	FALSE
291	2012-2013	MH2436	MH2466	5.8470965636198	FALSE	FALSE
292	2012-2013	MH2382	MH2466	4.8775353495168	FALSE	FALSE
293	2012-2013	MH2616	MH2706	143.485360576473	FALSE	FALSE
294	2012-2013	MH2527	MH2706	528.86987963906	FALSE	FALSE
295	2012-2013	MH2516	MH2706	530.968343390936	FALSE	FALSE
296	2012-2013	MH2466	MH2706	143.867379592869	FALSE	FALSE
297	2012-2013	MH2362	MH2706	142.453727759899	FALSE	FALSE
298	2012-2013	MH2364	MH2706	141.62901086766	FALSE	FALSE
299	2012-2013	MH2447	MH2706	129.577457089064	FALSE	FALSE
300	2012-2013	MH2448	MH2706	131.597741559813	FALSE	FALSE
301	2012-2013	MH2365	MH2706	157.77075126824	FALSE	FALSE
302	2012-2013	MH2436	MH2706	140.950438123695	FALSE	FALSE
303	2012-2013	MH2382	MH2706	139.980876909593	FALSE	FALSE
304	2012-2013	MH2530	MH2706	141.485360576473	FALSE	FALSE
305	2012-2013	MH2497	MH2706	141.851510507287	FALSE	FALSE
306	2012-2013	MH2365	MH2362	49.2537578751937	FALSE	FALSE
307	2012-2013	MH2365	MH2364	48.4290409829547	FALSE	FALSE
308	2012-2013	MH2362	MH2447	89.0604636960179	FALSE	FALSE
309	2012-2013	MH2364	MH2447	88.2357468037789	FALSE	FALSE
310	2012-2013	MH2365	MH2447	104.377487204359	FALSE	FALSE
311	2012-2013	MH2436	MH2447	87.5571740598143	FALSE	FALSE
312	2012-2013	MH2382	MH2447	86.5876128457113	FALSE	FALSE
313	2012-2013	MH2362	MH2448	114.968322326609	FALSE	FALSE
314	2012-2013	MH2364	MH2448	114.256031274528	FALSE	FALSE
315	2012-2013	MH2365	MH2448	130.397771675108	FALSE	FALSE
316	2012-2013	MH2436	MH2448	113.577458530564	FALSE	FALSE
317	2012-2013	MH2382	MH2448	112.607897316461	FALSE	FALSE
318	2012-2013	MH2616	MH2863	104.05098106575	FALSE	FALSE
319	2012-2013	MH2527	MH2863	518.418541598911	FALSE	FALSE
320	2012-2013	MH2516	MH2863	520.517005350788	FALSE	FALSE
321	2012-2013	MH2466	MH2863	44.4330000821467	FALSE	FALSE
322	2012-2013	MH2706	MH2863	147.536341642222	FALSE	FALSE
323	2012-2013	MH2362	MH2863	43.0193482491763	FALSE	FALSE
324	2012-2013	MH2364	MH2863	42.1946313569373	FALSE	FALSE
325	2012-2013	MH2447	MH2863	94.1430775783412	FALSE	FALSE
326	2012-2013	MH2448	MH2863	120.163362049091	FALSE	FALSE
327	2012-2013	MH2365	MH2863	54.336371757517	FALSE	FALSE
328	2012-2013	MH2810	MH2863	23.7686065362098	FALSE	FALSE
329	2012-2013	MH2436	MH2863	41.5160586129727	FALSE	FALSE
330	2012-2013	MH2737	MH2863	148.465192151008	FALSE	FALSE
331	2012-2013	MH2382	MH2863	40.5464973988697	FALSE	FALSE
332	2012-2013	MH2530	MH2863	106.05098106575	FALSE	FALSE
333	2012-2013	MH2497	MH2863	42.417130996564	FALSE	FALSE
334	2012-2013	MH2616	MH3208	34.0537287533874	FALSE	FALSE
335	2012-2013	MH2527	MH3208	508.421289286549	FALSE	FALSE
336	2012-2013	MH3061	MH3208	36.0537287533874	FALSE	FALSE
337	2012-2013	MH2516	MH3208	510.519753038425	FALSE	FALSE
338	2012-2013	MH2466	MH3208	102.435747769784	FALSE	FALSE
339	2012-2013	MH2706	MH3208	141.53908932986	FALSE	FALSE
340	2012-2013	MH2362	MH3208	101.022095936814	FALSE	FALSE
341	2012-2013	MH2364	MH3208	100.197379044575	FALSE	FALSE
342	2012-2013	MH2447	MH3208	55.961632240796	FALSE	FALSE
343	2012-2013	MH2448	MH3208	114.166109736728	FALSE	FALSE
344	2012-2013	MH2863	MH3208	106.104709819137	FALSE	FALSE
345	2012-2013	MH2365	MH3208	116.11956004027	FALSE	FALSE
346	2012-2013	MH2810	MH3208	105.771354223847	FALSE	FALSE
347	2012-2013	MH2436	MH3208	99.5188063006103	FALSE	FALSE
348	2012-2013	MH2737	MH3208	142.467939838645	FALSE	FALSE
349	2012-2013	MH2382	MH3208	98.5492450865073	FALSE	FALSE
350	2012-2013	MH2530	MH3208	32.0537287533874	FALSE	FALSE
351	2012-2013	MH2942	MH3208	518.098463041351	FALSE	FALSE
352	2012-2013	MH2497	MH3208	100.419878684202	FALSE	FALSE
353	2012-2013	MH2616	MH2810	103.71762547046	FALSE	FALSE
354	2012-2013	MH2527	MH2810	514.085186003622	FALSE	FALSE
355	2012-2013	MH2516	MH2810	516.183649755498	FALSE	FALSE
356	2012-2013	MH2466	MH2810	44.0996444868569	FALSE	FALSE
357	2012-2013	MH2706	MH2810	147.202986046933	FALSE	FALSE
358	2012-2013	MH2362	MH2810	42.6859926538865	FALSE	FALSE
359	2012-2013	MH2364	MH2810	41.8612757616475	FALSE	FALSE
360	2012-2013	MH2447	MH2810	93.8097219830514	FALSE	FALSE
361	2012-2013	MH2448	MH2810	119.830006453801	FALSE	FALSE
362	2012-2013	MH2365	MH2810	54.0030161622272	FALSE	FALSE
363	2012-2013	MH2436	MH2810	41.1827030176829	FALSE	FALSE
364	2012-2013	MH2737	MH2810	148.131836555718	FALSE	FALSE
365	2012-2013	MH2382	MH2810	40.2131418035799	FALSE	FALSE
366	2012-2013	MH2530	MH2810	105.71762547046	FALSE	FALSE
367	2012-2013	MH2497	MH2810	42.0837754012742	FALSE	FALSE
368	2012-2013	MH2362	MH2436	4.4334447306494	FALSE	FALSE
369	2012-2013	MH2364	MH2436	3.6087278384104	FALSE	FALSE
370	2012-2013	MH2365	MH2436	47.7504682389901	FALSE	FALSE
371	2012-2013	MH2382	MH2436	1.9605938803428	FALSE	FALSE
372	2012-2013	MH2616	MH2737	144.414211085258	FALSE	FALSE
373	2012-2013	MH2527	MH2737	530.781771618419	FALSE	FALSE
374	2012-2013	MH2516	MH2737	532.880235370296	FALSE	FALSE
375	2012-2013	MH2466	MH2737	144.796230101655	FALSE	FALSE
376	2012-2013	MH2362	MH2737	143.382578268684	FALSE	FALSE
377	2012-2013	MH2364	MH2737	142.557861376445	FALSE	FALSE
378	2012-2013	MH2447	MH2737	130.506307597849	FALSE	FALSE
379	2012-2013	MH2448	MH2737	132.526592068599	FALSE	FALSE
380	2012-2013	MH2365	MH2737	158.699601777025	FALSE	FALSE
381	2012-2013	MH2436	MH2737	141.879288632481	FALSE	FALSE
382	2012-2013	MH2382	MH2737	140.909727418378	FALSE	FALSE
383	2012-2013	MH2530	MH2737	142.414211085258	FALSE	FALSE
384	2012-2013	MH2497	MH2737	142.780361016072	FALSE	FALSE
385	2012-2013	MH2365	MH2382	46.7809070248871	FALSE	FALSE
386	2012-2013	MH2466	MH2530	102.382019016397	FALSE	FALSE
387	2012-2013	MH2362	MH2530	100.968367183426	FALSE	FALSE
388	2012-2013	MH2364	MH2530	100.143650291187	FALSE	FALSE
389	2012-2013	MH2447	MH2530	55.9079034874086	FALSE	FALSE
390	2012-2013	MH2448	MH2530	114.112380983341	FALSE	FALSE
391	2012-2013	MH2365	MH2530	116.065831286882	FALSE	FALSE
392	2012-2013	MH2436	MH2530	99.4650775472229	FALSE	FALSE
393	2012-2013	MH2382	MH2530	98.4955163331199	FALSE	FALSE
394	2012-2013	MH2497	MH2530	100.366149930814	FALSE	FALSE
395	2012-2013	MH2616	MH2942	526.044734287963	FALSE	FALSE
396	2012-2013	MH2527	MH2942	126.412294821125	FALSE	FALSE
397	2012-2013	MH2516	MH2942	128.510758573001	FALSE	FALSE
398	2012-2013	MH2466	MH2942	528.42675330436	FALSE	FALSE
399	2012-2013	MH2706	MH2942	542.547053393862	FALSE	FALSE
400	2012-2013	MH2362	MH2942	527.01310147139	FALSE	FALSE
401	2012-2013	MH2364	MH2942	526.188384579151	FALSE	FALSE
402	2012-2013	MH2447	MH2942	516.136830800555	FALSE	FALSE
403	2012-2013	MH2448	MH2942	518.157115271304	FALSE	FALSE
404	2012-2013	MH2863	MH2942	532.095715353713	FALSE	FALSE
405	2012-2013	MH2365	MH2942	542.330124979731	FALSE	FALSE
406	2012-2013	MH2810	MH2942	531.762359758424	FALSE	FALSE
407	2012-2013	MH2436	MH2942	524.925163630527	FALSE	FALSE
408	2012-2013	MH2737	MH2942	544.458945373221	FALSE	FALSE
409	2012-2013	MH2382	MH2942	524.540250621083	FALSE	FALSE
410	2012-2013	MH2530	MH2942	522.044734287963	FALSE	FALSE
411	2012-2013	MH2497	MH2942	526.410884218778	FALSE	FALSE
412	2012-2013	MH2466	MH2497	14.7481689472111	FALSE	FALSE
413	2012-2013	MH2362	MH2497	13.3345171142407	FALSE	FALSE
414	2012-2013	MH2364	MH2497	12.5098002220017	FALSE	FALSE
415	2012-2013	MH2447	MH2497	88.4582464434056	FALSE	FALSE
416	2012-2013	MH2448	MH2497	114.478530914155	FALSE	FALSE
417	2012-2013	MH2365	MH2497	48.6515406225814	FALSE	FALSE
418	2012-2013	MH2436	MH2497	11.8312274780371	FALSE	FALSE
419	2012-2013	MH2382	MH2497	10.8616662639341	FALSE	FALSE
420	2012-2013	MH2616	MH4091	111.135611119502	FALSE	FALSE
421	2012-2013	MH2527	MH4091	527.422335798938	FALSE	FALSE
422	2012-2013	MH3270	MH4091	118.646875531678	FALSE	FALSE
423	2012-2013	MH3061	MH4091	117.135611119502	FALSE	FALSE
424	2012-2013	MH2516	MH4091	529.520799550814	FALSE	FALSE
425	2012-2013	MH2466	MH4091	99.5176301358993	FALSE	FALSE
426	2012-2013	MH2706	MH4091	154.620971695975	FALSE	FALSE
427	2012-2013	MH2362	MH4091	98.1039783029289	FALSE	FALSE
428	2012-2013	MH2364	MH4091	97.2792614106899	FALSE	FALSE
429	2012-2013	MH2447	MH4091	101.227707632094	FALSE	FALSE
430	2012-2013	MH2448	MH4091	127.247992102843	FALSE	FALSE
431	2012-2013	MH2863	MH4091	103.186592185252	FALSE	FALSE
432	2012-2013	MH2365	MH4091	113.333239180484	FALSE	FALSE
433	2012-2013	MH3208	MH4091	113.18933987289	FALSE	FALSE
434	2012-2013	MH2810	MH4091	102.853236589962	FALSE	FALSE
435	2012-2013	MH2436	MH4091	96.6006886667253	FALSE	FALSE
436	2012-2013	MH2737	MH4091	155.54982220476	FALSE	FALSE
437	2012-2013	MH2382	MH4091	95.6311274526223	FALSE	FALSE
438	2012-2013	MH2530	MH4091	113.135611119502	FALSE	FALSE
439	2012-2013	MH2942	MH4091	541.09950955374	FALSE	FALSE
440	2012-2013	MH2497	MH4091	97.5017610503166	FALSE	FALSE
441	2013-2014	MH5679	MH5817	64.1063605807221	FALSE	FALSE
442	2013-2014	MH5680	MH5817	83.3325035690782	FALSE	FALSE
443	2013-2014	MH5709	MH5817	83.7579921687029	FALSE	FALSE
444	2013-2014	MH5229	MH5817	77.2233089792863	FALSE	FALSE
445	2013-2014	MH5677	MH5817	93.0186958585853	FALSE	FALSE
446	2013-2014	MH5548	MH5817	84.1421085406483	FALSE	FALSE
447	2013-2014	MH5549	MH5817	86.451667618174	FALSE	FALSE
448	2013-2014	MH5245	MH5817	77.2233089792863	FALSE	FALSE
449	2013-2014	MH5645	MH5817	173.290798054874	FALSE	FALSE
450	2013-2014	MH5646	MH5817	173.27933755553	FALSE	FALSE
451	2013-2014	MH5499	MH5817	65.2747416409721	FALSE	FALSE
452	2013-2014	MH5651	MH5817	87.9958895310729	FALSE	FALSE
453	2013-2014	MH5405	MH5817	89.9063932874005	FALSE	FALSE
454	2013-2014	MH5712	MH5817	85.9256978477229	FALSE	FALSE
455	2013-2014	MH5300	MH5817	79.7121300641638	FALSE	FALSE
456	2013-2014	MH5295	MH5817	82.2259207977653	FALSE	FALSE
457	2013-2014	MH5546	MH5817	74.2229917116414	FALSE	FALSE
458	2013-2014	MH5193	MH5817	59.2233089792863	FALSE	FALSE
459	2013-2014	MH5194	MH5817	59.2233089792863	FALSE	FALSE
460	2013-2014	MH5656	MH5817	69.2233089792863	FALSE	FALSE
461	2013-2014	MH5229	MH5679	54.8830516014358	FALSE	FALSE
462	2013-2014	MH5548	MH5679	69.8018511627978	FALSE	FALSE
463	2013-2014	MH5549	MH5679	72.1114102403235	FALSE	FALSE
464	2013-2014	MH5245	MH5679	54.8830516014358	FALSE	FALSE
465	2013-2014	MH5646	MH5679	158.93908017768	FALSE	FALSE
466	2013-2014	MH5499	MH5679	22.9344842631216	FALSE	FALSE
467	2013-2014	MH5651	MH5679	73.6556321532224	FALSE	FALSE
468	2013-2014	MH5405	MH5679	75.56613590955	FALSE	FALSE
469	2013-2014	MH5300	MH5679	57.3718726863133	FALSE	FALSE
470	2013-2014	MH5295	MH5679	59.8856634199148	FALSE	FALSE
471	2013-2014	MH5546	MH5679	63.8827343337909	FALSE	FALSE
472	2013-2014	MH5193	MH5679	16.8830516014358	FALSE	FALSE
473	2013-2014	MH5194	MH5679	16.8830516014358	FALSE	FALSE
474	2013-2014	MH5679	MH5680	68.9922461912277	FALSE	FALSE
475	2013-2014	MH5229	MH5680	82.1091945897919	FALSE	FALSE
476	2013-2014	MH5677	MH5680	45.9045814690909	FALSE	FALSE
477	2013-2014	MH5548	MH5680	85.0279941511539	FALSE	FALSE
478	2013-2014	MH5549	MH5680	87.3375532286796	FALSE	FALSE
479	2013-2014	MH5245	MH5680	82.1091945897919	FALSE	FALSE
480	2013-2014	MH5645	MH5680	174.176683665379	FALSE	FALSE
481	2013-2014	MH5646	MH5680	174.165223166036	FALSE	FALSE
482	2013-2014	MH5499	MH5680	70.1606272514777	FALSE	FALSE
483	2013-2014	MH5651	MH5680	60.8817751415785	FALSE	FALSE
484	2013-2014	MH5405	MH5680	90.7922788979061	FALSE	FALSE
485	2013-2014	MH5300	MH5680	84.5980156746694	FALSE	FALSE
486	2013-2014	MH5295	MH5680	87.1118064082709	FALSE	FALSE
487	2013-2014	MH5546	MH5680	43.108877322147	FALSE	FALSE
488	2013-2014	MH5193	MH5680	64.1091945897919	FALSE	FALSE
489	2013-2014	MH5194	MH5680	64.1091945897919	FALSE	FALSE
490	2013-2014	MH5656	MH5680	74.1091945897919	FALSE	FALSE
491	2013-2014	MH5679	MH5709	69.4177347908524	FALSE	FALSE
492	2013-2014	MH5229	MH5709	82.3677138672054	FALSE	FALSE
493	2013-2014	MH5677	MH5709	46.3300700687156	FALSE	FALSE
494	2013-2014	MH5548	MH5709	85.4534827507786	FALSE	FALSE
495	2013-2014	MH5549	MH5709	87.7630418283043	FALSE	FALSE
496	2013-2014	MH5245	MH5709	82.3677138672054	FALSE	FALSE
497	2013-2014	MH5645	MH5709	174.602172265004	FALSE	FALSE
498	2013-2014	MH5646	MH5709	174.590711765661	FALSE	FALSE
499	2013-2014	MH5499	MH5709	70.5861158511024	FALSE	FALSE
500	2013-2014	MH5651	MH5709	61.3072637412032	FALSE	FALSE
501	2013-2014	MH5405	MH5709	91.2177674975308	FALSE	FALSE
502	2013-2014	MH5712	MH5709	3.2370720578532	TRUE	TRUE
503	2013-2014	MH5300	MH5709	84.8565349520829	FALSE	FALSE
504	2013-2014	MH5295	MH5709	87.3703256856844	FALSE	FALSE
505	2013-2014	MH5546	MH5709	43.5343659217717	FALSE	FALSE
506	2013-2014	MH5193	MH5709	64.5346831894166	FALSE	FALSE
507	2013-2014	MH5194	MH5709	64.5346831894166	FALSE	FALSE
508	2013-2014	MH5656	MH5709	74.5346831894166	FALSE	FALSE
509	2013-2014	MH5193	MH5229	50	FALSE	FALSE
510	2013-2014	MH5194	MH5229	50	FALSE	FALSE
511	2013-2014	MH5679	MH5677	78.6784384807348	FALSE	FALSE
512	2013-2014	MH5229	MH5677	91.795386879299	FALSE	FALSE
513	2013-2014	MH5548	MH5677	94.714186440661	FALSE	FALSE
514	2013-2014	MH5549	MH5677	97.0237455181867	FALSE	FALSE
515	2013-2014	MH5245	MH5677	91.795386879299	FALSE	FALSE
516	2013-2014	MH5645	MH5677	183.862875954886	FALSE	FALSE
517	2013-2014	MH5646	MH5677	183.851415455543	FALSE	FALSE
518	2013-2014	MH5499	MH5677	79.8468195409848	FALSE	FALSE
519	2013-2014	MH5651	MH5677	70.5679674310856	FALSE	FALSE
520	2013-2014	MH5405	MH5677	98.4784711874132	FALSE	FALSE
521	2013-2014	MH5300	MH5677	94.2842079641765	FALSE	FALSE
522	2013-2014	MH5295	MH5677	96.797998697778	FALSE	FALSE
523	2013-2014	MH5546	MH5677	52.7950696116541	FALSE	FALSE
524	2013-2014	MH5193	MH5677	73.795386879299	FALSE	FALSE
525	2013-2014	MH5194	MH5677	73.795386879299	FALSE	FALSE
526	2013-2014	MH5656	MH5677	83.795386879299	FALSE	FALSE
527	2013-2014	MH5817	MH6260	169.41361280458	FALSE	FALSE
528	2013-2014	MH5679	MH6260	155.073355426729	FALSE	FALSE
529	2013-2014	MH5680	MH6260	170.299498415086	FALSE	FALSE
530	2013-2014	MH5709	MH6260	170.635394844692	FALSE	FALSE
531	2013-2014	MH5229	MH6260	168.190303825294	FALSE	FALSE
532	2013-2014	MH5677	MH6260	179.985690704593	FALSE	FALSE
533	2013-2014	MH5548	MH6260	155.109103386656	FALSE	FALSE
534	2013-2014	MH5549	MH6260	157.418662464181	FALSE	FALSE
535	2013-2014	MH6042	MH6260	158.301157233014	FALSE	FALSE
536	2013-2014	MH5245	MH6260	168.190303825294	FALSE	FALSE
537	2013-2014	MH5645	MH6260	184.257792900881	FALSE	FALSE
538	2013-2014	MH5646	MH6260	184.246332401538	FALSE	FALSE
539	2013-2014	MH5499	MH6260	156.241736486979	FALSE	FALSE
540	2013-2014	MH5651	MH6260	174.96288437708	FALSE	FALSE
541	2013-2014	MH5405	MH6260	170.873388133408	FALSE	FALSE
542	2013-2014	MH5712	MH6260	172.89269269373	FALSE	FALSE
543	2013-2014	MH5300	MH6260	170.679124910171	FALSE	FALSE
544	2013-2014	MH5295	MH6260	173.192915643773	FALSE	FALSE
545	2013-2014	MH5546	MH6260	165.189986557649	FALSE	FALSE
546	2013-2014	MH5193	MH6260	150.190303825294	FALSE	FALSE
547	2013-2014	MH5194	MH6260	150.190303825294	FALSE	FALSE
548	2013-2014	MH5656	MH6260	160.190303825294	FALSE	FALSE
549	2013-2014	MH5848	MH6260	169.772453537272	FALSE	FALSE
550	2013-2014	MH5849	MH6260	170.121233921361	FALSE	FALSE
551	2013-2014	MH5229	MH5548	82.918799561362	FALSE	FALSE
552	2013-2014	MH5245	MH5548	82.918799561362	FALSE	FALSE
553	2013-2014	MH5499	MH5548	70.9702322230478	FALSE	FALSE
554	2013-2014	MH5405	MH5548	87.6018838694762	FALSE	FALSE
555	2013-2014	MH5300	MH5548	85.4076206462395	FALSE	FALSE
556	2013-2014	MH5295	MH5548	87.921411379841	FALSE	FALSE
557	2013-2014	MH5546	MH5548	79.9184822937171	FALSE	FALSE
558	2013-2014	MH5193	MH5548	64.918799561362	FALSE	FALSE
559	2013-2014	MH5194	MH5548	64.918799561362	FALSE	FALSE
560	2013-2014	MH5229	MH5549	85.2283586388877	FALSE	FALSE
561	2013-2014	MH5245	MH5549	85.2283586388877	FALSE	FALSE
562	2013-2014	MH5499	MH5549	73.2797913005735	FALSE	FALSE
563	2013-2014	MH5405	MH5549	89.9114429470019	FALSE	FALSE
564	2013-2014	MH5300	MH5549	87.7171797237652	FALSE	FALSE
565	2013-2014	MH5295	MH5549	90.2309704573667	FALSE	FALSE
566	2013-2014	MH5546	MH5549	82.2280413712428	FALSE	FALSE
567	2013-2014	MH5193	MH5549	67.2283586388877	FALSE	FALSE
568	2013-2014	MH5194	MH5549	67.2283586388877	FALSE	FALSE
569	2013-2014	MH5817	MH6042	67.3341623870067	FALSE	FALSE
570	2013-2014	MH5679	MH6042	24.9939050091562	FALSE	FALSE
571	2013-2014	MH5680	MH6042	72.2200479975123	FALSE	FALSE
572	2013-2014	MH5709	MH6042	72.645536597137	FALSE	FALSE
573	2013-2014	MH5229	MH6042	58.1108534077204	FALSE	FALSE
574	2013-2014	MH5677	MH6042	81.9062402870194	FALSE	FALSE
575	2013-2014	MH5548	MH6042	73.0296529690824	FALSE	FALSE
576	2013-2014	MH5549	MH6042	75.3392120466081	FALSE	FALSE
577	2013-2014	MH5245	MH6042	58.1108534077204	FALSE	FALSE
578	2013-2014	MH5645	MH6042	162.178342483308	FALSE	FALSE
579	2013-2014	MH5646	MH6042	162.166881983964	FALSE	FALSE
580	2013-2014	MH5499	MH6042	26.1622860694062	FALSE	FALSE
581	2013-2014	MH5651	MH6042	76.883433959507	FALSE	FALSE
582	2013-2014	MH5405	MH6042	78.7939377158346	FALSE	FALSE
583	2013-2014	MH5712	MH6042	74.813242276157	FALSE	FALSE
584	2013-2014	MH5300	MH6042	60.5996744925979	FALSE	FALSE
585	2013-2014	MH5295	MH6042	63.1134652261994	FALSE	FALSE
586	2013-2014	MH5546	MH6042	67.1105361400755	FALSE	FALSE
587	2013-2014	MH5193	MH6042	16.1108534077204	FALSE	FALSE
588	2013-2014	MH5194	MH6042	16.1108534077204	FALSE	FALSE
589	2013-2014	MH5656	MH6042	26.1108534077204	FALSE	FALSE
590	2013-2014	MH5848	MH6042	71.6930031196993	FALSE	FALSE
591	2013-2014	MH5849	MH6042	72.0417835037881	FALSE	FALSE
592	2013-2014	MH5193	MH5245	50	FALSE	FALSE
593	2013-2014	MH5194	MH5245	50	FALSE	FALSE
594	2013-2014	MH5229	MH5645	172.067489075587	FALSE	FALSE
595	2013-2014	MH5548	MH5645	162.986288636949	FALSE	FALSE
596	2013-2014	MH5549	MH5645	165.295847714475	FALSE	FALSE
597	2013-2014	MH5245	MH5645	172.067489075587	FALSE	FALSE
598	2013-2014	MH5646	MH5645	0.1235176518312	TRUE	TRUE
599	2013-2014	MH5499	MH5645	160.118921737273	FALSE	FALSE
600	2013-2014	MH5651	MH5645	178.840069627374	FALSE	FALSE
601	2013-2014	MH5405	MH5645	176.750573383701	FALSE	FALSE
602	2013-2014	MH5300	MH5645	174.556310160465	FALSE	FALSE
603	2013-2014	MH5295	MH5645	177.070100894066	FALSE	FALSE
604	2013-2014	MH5546	MH5645	169.067171807942	FALSE	FALSE
605	2013-2014	MH5193	MH5645	154.067489075587	FALSE	FALSE
606	2013-2014	MH5194	MH5645	154.067489075587	FALSE	FALSE
607	2013-2014	MH5229	MH5646	172.056028576244	FALSE	FALSE
608	2013-2014	MH5548	MH5646	162.974828137606	FALSE	FALSE
609	2013-2014	MH5549	MH5646	165.284387215132	FALSE	FALSE
610	2013-2014	MH5245	MH5646	172.056028576244	FALSE	FALSE
611	2013-2014	MH5499	MH5646	160.10746123793	FALSE	FALSE
612	2013-2014	MH5651	MH5646	178.828609128031	FALSE	FALSE
613	2013-2014	MH5405	MH5646	176.739112884358	FALSE	FALSE
614	2013-2014	MH5300	MH5646	174.544849661121	FALSE	FALSE
615	2013-2014	MH5295	MH5646	177.058640394723	FALSE	FALSE
616	2013-2014	MH5546	MH5646	169.055711308599	FALSE	FALSE
617	2013-2014	MH5193	MH5646	154.056028576244	FALSE	FALSE
618	2013-2014	MH5194	MH5646	154.056028576244	FALSE	FALSE
619	2013-2014	MH5817	MH6262	177.531029108904	FALSE	FALSE
620	2013-2014	MH5679	MH6262	163.190771731054	FALSE	FALSE
621	2013-2014	MH5680	MH6262	178.41691471941	FALSE	FALSE
622	2013-2014	MH5709	MH6262	178.842403319034	FALSE	FALSE
623	2013-2014	MH5229	MH6262	176.307720129618	FALSE	FALSE
624	2013-2014	MH5677	MH6262	188.103107008917	FALSE	FALSE
625	2013-2014	MH6260	MH6262	188.378687578797	FALSE	FALSE
626	2013-2014	MH5548	MH6262	167.22651969098	FALSE	FALSE
627	2013-2014	MH5549	MH6262	169.536078768506	FALSE	FALSE
628	2013-2014	MH6042	MH6262	166.418573537338	FALSE	FALSE
629	2013-2014	MH5245	MH6262	176.307720129618	FALSE	FALSE
630	2013-2014	MH5645	MH6262	62.3752092052051	FALSE	FALSE
631	2013-2014	MH5646	MH6262	62.3637487058617	FALSE	FALSE
632	2013-2014	MH5499	MH6262	164.359152791304	FALSE	FALSE
633	2013-2014	MH5651	MH6262	183.080300681404	FALSE	FALSE
634	2013-2014	MH5405	MH6262	180.990804437732	FALSE	FALSE
635	2013-2014	MH5712	MH6262	180.534289121648	FALSE	FALSE
636	2013-2014	MH5300	MH6262	178.796541214495	FALSE	FALSE
637	2013-2014	MH5295	MH6262	181.310331948097	FALSE	FALSE
638	2013-2014	MH5546	MH6262	173.307402861973	FALSE	FALSE
639	2013-2014	MH5193	MH6262	158.307720129618	FALSE	FALSE
640	2013-2014	MH5194	MH6262	158.307720129618	FALSE	FALSE
641	2013-2014	MH5656	MH6262	168.307720129618	FALSE	FALSE
642	2013-2014	MH5848	MH6262	177.889869841597	FALSE	FALSE
643	2013-2014	MH5849	MH6262	178.238650225686	FALSE	FALSE
644	2013-2014	MH5229	MH5499	56.0514326616858	FALSE	FALSE
645	2013-2014	MH5245	MH5499	56.0514326616858	FALSE	FALSE
646	2013-2014	MH5405	MH5499	76.7345169698	FALSE	FALSE
647	2013-2014	MH5300	MH5499	58.5402537465633	FALSE	FALSE
648	2013-2014	MH5295	MH5499	61.0540444801648	FALSE	FALSE
649	2013-2014	MH5193	MH5499	18.0514326616858	FALSE	FALSE
650	2013-2014	MH5194	MH5499	18.0514326616858	FALSE	FALSE
651	2013-2014	MH5229	MH5651	86.7725805517866	FALSE	FALSE
652	2013-2014	MH5548	MH5651	89.6913801131486	FALSE	FALSE
653	2013-2014	MH5549	MH5651	92.0009391906743	FALSE	FALSE
654	2013-2014	MH5245	MH5651	86.7725805517866	FALSE	FALSE
655	2013-2014	MH5499	MH5651	74.8240132134724	FALSE	FALSE
656	2013-2014	MH5405	MH5651	95.4556648599008	FALSE	FALSE
657	2013-2014	MH5300	MH5651	89.2614016366641	FALSE	FALSE
658	2013-2014	MH5295	MH5651	91.7751923702656	FALSE	FALSE
659	2013-2014	MH5546	MH5651	55.6579420702057	FALSE	FALSE
660	2013-2014	MH5193	MH5651	68.7725805517866	FALSE	FALSE
661	2013-2014	MH5194	MH5651	68.7725805517866	FALSE	FALSE
662	2013-2014	MH5229	MH5405	88.6830843081142	FALSE	FALSE
663	2013-2014	MH5245	MH5405	88.6830843081142	FALSE	FALSE
664	2013-2014	MH5300	MH5405	91.1719053929917	FALSE	FALSE
665	2013-2014	MH5295	MH5405	93.6856961265932	FALSE	FALSE
666	2013-2014	MH5193	MH5405	70.6830843081142	FALSE	FALSE
667	2013-2014	MH5194	MH5405	70.6830843081142	FALSE	FALSE
668	2013-2014	MH5679	MH5712	71.5854404698724	FALSE	FALSE
669	2013-2014	MH5680	MH5712	2.8115834582285	TRUE	TRUE
670	2013-2014	MH5229	MH5712	84.7023888684366	FALSE	FALSE
671	2013-2014	MH5677	MH5712	48.4977757477356	FALSE	FALSE
672	2013-2014	MH5548	MH5712	87.6211884297986	FALSE	FALSE
673	2013-2014	MH5549	MH5712	89.9307475073243	FALSE	FALSE
674	2013-2014	MH5245	MH5712	84.7023888684366	FALSE	FALSE
675	2013-2014	MH5645	MH5712	176.769877944024	FALSE	FALSE
676	2013-2014	MH5646	MH5712	176.75841744468	FALSE	FALSE
677	2013-2014	MH5499	MH5712	72.7538215301224	FALSE	FALSE
678	2013-2014	MH5651	MH5712	63.4749694202232	FALSE	FALSE
679	2013-2014	MH5405	MH5712	93.3854731765508	FALSE	FALSE
680	2013-2014	MH5300	MH5712	87.1912099533141	FALSE	FALSE
681	2013-2014	MH5295	MH5712	89.7050006869156	FALSE	FALSE
682	2013-2014	MH5546	MH5712	45.7020716007917	FALSE	FALSE
683	2013-2014	MH5193	MH5712	66.7023888684366	FALSE	FALSE
684	2013-2014	MH5194	MH5712	66.7023888684366	FALSE	FALSE
685	2013-2014	MH5656	MH5712	76.7023888684366	FALSE	FALSE
686	2013-2014	MH5229	MH5300	2.4888210848775	FALSE	FALSE
687	2013-2014	MH5295	MH5300	7.4914329033565	TRUE	TRUE
688	2013-2014	MH5193	MH5300	52.4888210848775	FALSE	FALSE
689	2013-2014	MH5194	MH5300	52.4888210848775	FALSE	FALSE
690	2013-2014	MH5229	MH5295	5.002611818479	FALSE	FALSE
691	2013-2014	MH5245	MH5295	5.002611818479	TRUE	TRUE
692	2013-2014	MH5193	MH5295	55.002611818479	FALSE	FALSE
693	2013-2014	MH5194	MH5295	55.002611818479	FALSE	FALSE
694	2013-2014	MH5229	MH5546	72.9996827323551	FALSE	FALSE
695	2013-2014	MH5245	MH5546	72.9996827323551	FALSE	FALSE
696	2013-2014	MH5499	MH5546	65.0511153940409	FALSE	FALSE
697	2013-2014	MH5405	MH5546	85.6827670404693	FALSE	FALSE
698	2013-2014	MH5300	MH5546	75.4885038172326	FALSE	FALSE
699	2013-2014	MH5295	MH5546	78.0022945508341	FALSE	FALSE
700	2013-2014	MH5193	MH5546	58.9996827323551	FALSE	FALSE
701	2013-2014	MH5194	MH5546	58.9996827323551	FALSE	FALSE
702	2013-2014	MH5194	MH5193	0	TRUE	TRUE
703	2013-2014	MH5229	MH5656	60	FALSE	FALSE
704	2013-2014	MH5548	MH5656	74.918799561362	FALSE	FALSE
705	2013-2014	MH5549	MH5656	77.2283586388877	FALSE	FALSE
706	2013-2014	MH5245	MH5656	60	FALSE	FALSE
707	2013-2014	MH5646	MH5656	164.056028576244	FALSE	FALSE
708	2013-2014	MH5499	MH5656	28.0514326616858	FALSE	FALSE
709	2013-2014	MH5651	MH5656	78.7725805517866	FALSE	FALSE
710	2013-2014	MH5405	MH5656	80.6830843081142	FALSE	FALSE
711	2013-2014	MH5300	MH5656	62.4888210848775	FALSE	FALSE
712	2013-2014	MH5295	MH5656	65.002611818479	FALSE	FALSE
713	2013-2014	MH5546	MH5656	68.9996827323551	FALSE	FALSE
714	2013-2014	MH5193	MH5656	18	FALSE	FALSE
715	2013-2014	MH5194	MH5656	18	FALSE	FALSE
716	2013-2014	MH5817	MH5848	82.8054586912652	FALSE	FALSE
717	2013-2014	MH5679	MH5848	68.4652013134147	FALSE	FALSE
718	2013-2014	MH5680	MH5848	15.6913443017708	FALSE	FALSE
719	2013-2014	MH5709	MH5848	16.1168329013955	FALSE	FALSE
720	2013-2014	MH5229	MH5848	81.5821497119789	FALSE	FALSE
721	2013-2014	MH5677	MH5848	45.3775365912779	FALSE	FALSE
722	2013-2014	MH5548	MH5848	84.5009492733409	FALSE	FALSE
723	2013-2014	MH5549	MH5848	86.8105083508666	FALSE	FALSE
724	2013-2014	MH5245	MH5848	81.5821497119789	FALSE	FALSE
725	2013-2014	MH5645	MH5848	173.649638787566	FALSE	FALSE
726	2013-2014	MH5646	MH5848	173.638178288223	FALSE	FALSE
727	2013-2014	MH5499	MH5848	65.6335823736647	FALSE	FALSE
728	2013-2014	MH5651	MH5848	60.3547302637655	FALSE	FALSE
729	2013-2014	MH5405	MH5848	90.2652340200931	FALSE	FALSE
730	2013-2014	MH5712	MH5848	18.2845385804155	FALSE	FALSE
731	2013-2014	MH5300	MH5848	84.0709707968564	FALSE	FALSE
732	2013-2014	MH5295	MH5848	86.5847615304579	FALSE	FALSE
733	2013-2014	MH5546	MH5848	42.581832444334	FALSE	FALSE
734	2013-2014	MH5193	MH5848	63.5821497119789	FALSE	FALSE
735	2013-2014	MH5194	MH5848	63.5821497119789	FALSE	FALSE
736	2013-2014	MH5656	MH5848	73.5821497119789	FALSE	FALSE
737	2013-2014	MH5817	MH5849	83.154239075354	FALSE	FALSE
738	2013-2014	MH5679	MH5849	68.8139816975035	FALSE	FALSE
739	2013-2014	MH5680	MH5849	16.0401246858596	FALSE	FALSE
740	2013-2014	MH5709	MH5849	16.4656132854843	FALSE	FALSE
741	2013-2014	MH5229	MH5849	81.9309300960677	FALSE	FALSE
742	2013-2014	MH5677	MH5849	45.7263169753667	FALSE	FALSE
743	2013-2014	MH5548	MH5849	84.8497296574297	FALSE	FALSE
744	2013-2014	MH5549	MH5849	87.1592887349554	FALSE	FALSE
745	2013-2014	MH5245	MH5849	81.9309300960677	FALSE	FALSE
746	2013-2014	MH5645	MH5849	173.998419171655	FALSE	FALSE
747	2013-2014	MH5646	MH5849	173.986958672312	FALSE	FALSE
748	2013-2014	MH5499	MH5849	65.9823627577535	FALSE	FALSE
749	2013-2014	MH5651	MH5849	60.7035106478543	FALSE	FALSE
750	2013-2014	MH5405	MH5849	90.6140144041819	FALSE	FALSE
751	2013-2014	MH5712	MH5849	18.6333189645043	FALSE	FALSE
752	2013-2014	MH5300	MH5849	84.4197511809452	FALSE	FALSE
753	2013-2014	MH5295	MH5849	86.9335419145467	FALSE	FALSE
754	2013-2014	MH5546	MH5849	42.9306128284228	FALSE	FALSE
755	2013-2014	MH5193	MH5849	63.9309300960677	FALSE	FALSE
756	2013-2014	MH5194	MH5849	63.9309300960677	FALSE	FALSE
757	2013-2014	MH5656	MH5849	73.9309300960677	FALSE	FALSE
758	2014-2015	HS1394	HS1563	92.3786510240707	FALSE	FALSE
759	2014-2015	MH7843	HS1563	92.4329349243968	FALSE	FALSE
760	2014-2015	MH8155	HS1563	84.3837764521807	FALSE	FALSE
761	2014-2015	HS1376	HS1563	88.5186790491955	FALSE	FALSE
762	2014-2015	HS1484	HS1563	92.3786510240707	FALSE	FALSE
763	2014-2015	MH8156	HS1563	393.152881516505	FALSE	FALSE
764	2014-2015	MH7505	HS1563	79.0338744513714	FALSE	FALSE
765	2014-2015	HS1255	HS1563	75.6693233516626	FALSE	FALSE
766	2014-2015	MH7796	HS1563	36.6023841238477	FALSE	FALSE
767	2014-2015	MH8165	HS1563	28.757560212055	FALSE	FALSE
768	2014-2015	MH7492	HS1563	80.2041734317667	FALSE	FALSE
769	2014-2015	HS1340	HS1563	82.5498290758842	FALSE	FALSE
770	2014-2015	HS1413	HS1563	20.5765638580605	FALSE	FALSE
771	2014-2015	HS1448	HS1563	88.3786510240707	FALSE	FALSE
772	2014-2015	HS1393	HS1563	18.3786510240707	FALSE	FALSE
773	2014-2015	MH7890	HS1563	75.7174833530085	FALSE	FALSE
774	2014-2015	HS1345	HS1563	74.4850172545143	FALSE	FALSE
775	2014-2015	HS1369	HS1563	26.6433675467534	FALSE	FALSE
776	2014-2015	HS1336	HS1563	20.5859894610213	FALSE	FALSE
777	2014-2015	MH7612	HS1563	20.4797015687594	FALSE	FALSE
778	2014-2015	HS1377	HS1563	92.3786510240707	FALSE	FALSE
779	2014-2015	MH8589	HS1563	30.6414601318427	FALSE	FALSE
780	2014-2015	MH7845	HS1563	90.3565198579386	FALSE	FALSE
781	2014-2015	MH7891	HS1563	76.5934891883786	FALSE	FALSE
782	2014-2015	MH8126	HS1563	77.6509269926809	FALSE	FALSE
783	2014-2015	MH7409	HS1563	74.3786510240707	FALSE	FALSE
784	2014-2015	MH7893	HS1563	84.5109563723764	FALSE	FALSE
785	2014-2015	HS1530	HS1563	69.3523092106899	FALSE	FALSE
786	2014-2015	HS1388	HS1563	90.4215668787253	FALSE	FALSE
787	2014-2015	HS1342	HS1563	92.5006343712111	FALSE	FALSE
788	2014-2015	HS1543	HS1563	92.7432372393543	FALSE	FALSE
789	2014-2015	HS1544	HS1563	90.6671846428253	FALSE	FALSE
790	2014-2015	MH8439	HS1563	90.4272498635988	FALSE	FALSE
791	2014-2015	MH7455	HS1563	76.4499668594068	FALSE	FALSE
792	2014-2015	HS1408	HS1563	77.8070123757263	FALSE	FALSE
793	2014-2015	MH7885	HS1563	76.3786510240707	FALSE	FALSE
794	2014-2015	HS1409	HS1563	76.5154889892171	FALSE	FALSE
795	2014-2015	MH7440	HS1563	81.4315846694103	FALSE	FALSE
796	2014-2015	MH7390	HS1563	80.642291122782	FALSE	FALSE
797	2014-2015	HS1256	HS1563	78.6030753835208	FALSE	FALSE
798	2014-2015	MH8386	HS1563	94.6185423247057	FALSE	FALSE
799	2014-2015	HS1507	HS1563	94.7033933989694	FALSE	FALSE
800	2014-2015	HS1328	HS1563	20.3786510240707	FALSE	FALSE
801	2014-2015	HS1327	HS1563	18.458646090874	FALSE	FALSE
802	2014-2015	HS1313	HS1563	18.8406567892667	FALSE	FALSE
803	2014-2015	HS1250	HS1563	78.2970441918704	FALSE	FALSE
804	2014-2015	HS1294	HS1563	78.8417472592285	FALSE	FALSE
805	2014-2015	HS1253	HS1563	78.3786510240707	FALSE	FALSE
806	2014-2015	HS1532	HS1563	80.3786510240707	FALSE	FALSE
807	2014-2015	HS1455	HS1563	94.401959313568	FALSE	FALSE
808	2014-2015	HS1385	HS1563	292.378651024071	FALSE	FALSE
809	2014-2015	HS1357	HS1563	90.3786510240707	FALSE	FALSE
810	2014-2015	HS1525	HS1563	78.3786510240707	FALSE	FALSE
811	2014-2015	HS1349	HS1563	290.855673568752	FALSE	FALSE
812	2014-2015	HS1465	HS1563	70.3786510240707	FALSE	FALSE
813	2014-2015	HS1463	HS1563	70.3786510240707	FALSE	FALSE
814	2014-2015	MH8041	HS1563	70.4229386524832	FALSE	FALSE
815	2014-2015	HS1460	HS1563	88.3786510240707	FALSE	FALSE
816	2014-2015	HS1427	HS1563	88.6020235267843	FALSE	FALSE
817	2014-2015	HS1375	HS1563	85.1681794996035	FALSE	FALSE
818	2014-2015	HS1341	HS1563	84.8380106566993	FALSE	FALSE
819	2014-2015	HS1517	HS1563	78.5161927336028	FALSE	FALSE
820	2014-2015	HS1537	HS1563	74.3786510240707	FALSE	FALSE
821	2014-2015	HS1509	HS1563	76.3786510240707	FALSE	FALSE
822	2014-2015	MH8183	HS1563	86.070630293339	FALSE	FALSE
823	2014-2015	MH7800	HS1563	83.2391838724017	FALSE	FALSE
824	2014-2015	MH8129	HS1563	49.8043461795968	FALSE	FALSE
825	2014-2015	HS1392	HS1563	18.3786510240707	FALSE	FALSE
826	2014-2015	HS1402	HS1563	78.3786510240707	FALSE	FALSE
827	2014-2015	HS1401	HS1563	78.4473531646475	FALSE	FALSE
828	2014-2015	HS1351	HS1563	78.4310948398372	FALSE	FALSE
829	2014-2015	HS1487	HS1563	82.4260382195613	FALSE	FALSE
830	2014-2015	MH8088	HS1563	77.3753266788286	FALSE	FALSE
831	2014-2015	MH8089	HS1563	75.916940462912	FALSE	FALSE
832	2014-2015	HS1421	HS1563	74.7958973567947	FALSE	FALSE
833	2014-2015	HS1473	HS1563	17.3909973585587	FALSE	FALSE
834	2014-2015	HS1474	HS1563	84.6758154928517	FALSE	FALSE
835	2014-2015	HS1518	HS1563	37.0328968677767	FALSE	FALSE
836	2014-2015	HS1519	HS1563	36.4278874461885	FALSE	FALSE
837	2014-2015	HS1520	HS1563	36.5587470231622	FALSE	FALSE
838	2014-2015	HS1505	HS1563	3.0600801691747	FALSE	FALSE
839	2014-2015	MH8392	HS1563	2.3786510240707	FALSE	FALSE
840	2014-2015	HS1457	HS1563	22.6640880491147	FALSE	FALSE
841	2014-2015	MH8354	HS1563	22.6034938282011	FALSE	FALSE
842	2014-2015	HS1510	HS1563	23.7242278605592	FALSE	FALSE
843	2014-2015	HS1364	HS1563	76.4601086113042	FALSE	FALSE
844	2014-2015	HS1405	HS1563	92.3786510240707	FALSE	FALSE
845	2014-2015	HS1425	HS1563	84.5095865231778	FALSE	FALSE
846	2014-2015	MH8393	HS1563	292.285590317454	FALSE	FALSE
847	2014-2015	MH8309	HS1563	86.3786510240707	FALSE	FALSE
848	2014-2015	HS1450	HS1563	84.3342623952653	FALSE	FALSE
849	2014-2015	MH8137	HS1563	48.3842912195477	FALSE	FALSE
850	2014-2015	MH8447	HS1563	94.9511357486537	FALSE	FALSE
851	2014-2015	MH8052	HS1563	16.4976916373998	FALSE	FALSE
852	2014-2015	MH8396	HS1563	18.3786510240707	FALSE	FALSE
853	2014-2015	MH8090	HS1563	19.3743333173737	FALSE	FALSE
854	2014-2015	HS1445	HS1563	20.2538161495665	FALSE	FALSE
855	2014-2015	HS1387	HS1563	18.3786510240707	FALSE	FALSE
856	2014-2015	HS1367	HS1563	78.7120892067477	FALSE	FALSE
857	2014-2015	HS1390	HS1563	83.6521883645999	FALSE	FALSE
858	2014-2015	HS1391	HS1563	82.3786510240707	FALSE	FALSE
859	2014-2015	HS1394	HS1562	92	FALSE	FALSE
860	2014-2015	MH7843	HS1562	92.0542839003261	FALSE	FALSE
861	2014-2015	MH8155	HS1562	84.00512542811	FALSE	FALSE
862	2014-2015	HS1376	HS1562	88.1400280251248	FALSE	FALSE
863	2014-2015	HS1484	HS1562	92	FALSE	FALSE
864	2014-2015	MH8156	HS1562	392.774230492434	FALSE	FALSE
865	2014-2015	MH7505	HS1562	78.6552234273007	FALSE	FALSE
866	2014-2015	HS1255	HS1562	75.2906723275919	FALSE	FALSE
867	2014-2015	MH7796	HS1562	36.223733099777	FALSE	FALSE
868	2014-2015	MH8165	HS1562	28.3789091879843	FALSE	FALSE
869	2014-2015	MH7492	HS1562	79.825522407696	FALSE	FALSE
870	2014-2015	HS1340	HS1562	82.1711780518135	FALSE	FALSE
871	2014-2015	HS1413	HS1562	20.1979128339898	FALSE	FALSE
872	2014-2015	HS1448	HS1562	88	FALSE	FALSE
873	2014-2015	HS1393	HS1562	18	FALSE	FALSE
874	2014-2015	MH7890	HS1562	75.3388323289378	FALSE	FALSE
875	2014-2015	HS1345	HS1562	74.1063662304436	FALSE	FALSE
876	2014-2015	HS1369	HS1562	26.2647165226827	FALSE	FALSE
877	2014-2015	HS1336	HS1562	20.2073384369506	FALSE	FALSE
878	2014-2015	MH7612	HS1562	20.1010505446887	FALSE	FALSE
879	2014-2015	HS1377	HS1562	92	FALSE	FALSE
880	2014-2015	MH8589	HS1562	30.262809107772	FALSE	FALSE
881	2014-2015	MH7845	HS1562	89.9778688338679	FALSE	FALSE
882	2014-2015	MH7891	HS1562	76.2148381643079	FALSE	FALSE
883	2014-2015	MH8126	HS1562	77.2722759686102	FALSE	FALSE
884	2014-2015	MH7409	HS1562	74	FALSE	FALSE
885	2014-2015	MH7893	HS1562	84.1323053483057	FALSE	FALSE
886	2014-2015	HS1530	HS1562	68.9736581866191	FALSE	FALSE
887	2014-2015	HS1388	HS1562	90.0429158546546	FALSE	FALSE
888	2014-2015	HS1342	HS1562	92.1219833471404	FALSE	FALSE
889	2014-2015	HS1543	HS1562	92.3645862152836	FALSE	FALSE
890	2014-2015	HS1544	HS1562	90.2885336187546	FALSE	FALSE
891	2014-2015	MH8439	HS1562	90.0485988395281	FALSE	FALSE
892	2014-2015	MH7455	HS1562	76.0713158353361	FALSE	FALSE
893	2014-2015	HS1408	HS1562	77.4283613516556	FALSE	FALSE
894	2014-2015	MH7885	HS1562	76	FALSE	FALSE
895	2014-2015	HS1409	HS1562	76.1368379651464	FALSE	FALSE
896	2014-2015	MH7440	HS1562	81.0529336453396	FALSE	FALSE
897	2014-2015	MH7390	HS1562	80.2636400987113	FALSE	FALSE
898	2014-2015	HS1256	HS1562	78.2244243594501	FALSE	FALSE
899	2014-2015	MH8386	HS1562	94.239891300635	FALSE	FALSE
900	2014-2015	HS1507	HS1562	94.3247423748987	FALSE	FALSE
901	2014-2015	HS1328	HS1562	20	FALSE	FALSE
902	2014-2015	HS1327	HS1562	18.0799950668033	FALSE	FALSE
903	2014-2015	HS1313	HS1562	18.462005765196	FALSE	FALSE
904	2014-2015	HS1250	HS1562	77.9183931677997	FALSE	FALSE
905	2014-2015	HS1294	HS1562	78.4630962351578	FALSE	FALSE
906	2014-2015	HS1253	HS1562	78	FALSE	FALSE
907	2014-2015	HS1532	HS1562	80	FALSE	FALSE
908	2014-2015	HS1455	HS1562	94.0233082894973	FALSE	FALSE
909	2014-2015	HS1385	HS1562	292	FALSE	FALSE
910	2014-2015	HS1357	HS1562	90	FALSE	FALSE
911	2014-2015	HS1525	HS1562	78	FALSE	FALSE
912	2014-2015	HS1349	HS1562	290.477022544682	FALSE	FALSE
913	2014-2015	HS1465	HS1562	70	FALSE	FALSE
914	2014-2015	HS1463	HS1562	70	FALSE	FALSE
915	2014-2015	MH8041	HS1562	70.0442876284125	FALSE	FALSE
916	2014-2015	HS1460	HS1562	88	FALSE	FALSE
917	2014-2015	HS1427	HS1562	88.2233725027136	FALSE	FALSE
918	2014-2015	HS1375	HS1562	84.7895284755328	FALSE	FALSE
919	2014-2015	HS1341	HS1562	84.4593596326286	FALSE	FALSE
920	2014-2015	HS1517	HS1562	78.1375417095321	FALSE	FALSE
921	2014-2015	HS1537	HS1562	74	FALSE	FALSE
922	2014-2015	HS1509	HS1562	76	FALSE	FALSE
923	2014-2015	MH8183	HS1562	85.6919792692683	FALSE	FALSE
924	2014-2015	MH7800	HS1562	82.860532848331	FALSE	FALSE
925	2014-2015	MH8129	HS1562	49.4256951555261	FALSE	FALSE
926	2014-2015	HS1392	HS1562	18	FALSE	FALSE
927	2014-2015	HS1402	HS1562	78	FALSE	FALSE
928	2014-2015	HS1401	HS1562	78.0687021405768	FALSE	FALSE
929	2014-2015	HS1351	HS1562	78.0524438157665	FALSE	FALSE
930	2014-2015	HS1487	HS1562	82.0473871954906	FALSE	FALSE
931	2014-2015	MH8088	HS1562	76.9966756547579	FALSE	FALSE
932	2014-2015	MH8089	HS1562	75.5382894388413	FALSE	FALSE
933	2014-2015	HS1421	HS1562	74.417246332724	FALSE	FALSE
934	2014-2015	HS1473	HS1562	17.012346334488	FALSE	FALSE
935	2014-2015	HS1474	HS1562	84.297164468781	FALSE	FALSE
936	2014-2015	HS1518	HS1562	36.654245843706	FALSE	FALSE
937	2014-2015	HS1519	HS1562	36.0492364221178	FALSE	FALSE
938	2014-2015	HS1520	HS1562	36.1800959990915	FALSE	FALSE
939	2014-2015	HS1505	HS1562	2.681429145104	FALSE	FALSE
940	2014-2015	MH8392	HS1562	2	FALSE	FALSE
941	2014-2015	HS1457	HS1562	22.285437025044	FALSE	FALSE
942	2014-2015	MH8354	HS1562	22.2248428041304	FALSE	FALSE
943	2014-2015	HS1510	HS1562	23.3455768364885	FALSE	FALSE
944	2014-2015	HS1364	HS1562	76.0814575872335	FALSE	FALSE
945	2014-2015	HS1405	HS1562	92	FALSE	FALSE
946	2014-2015	HS1425	HS1562	84.1309354991071	FALSE	FALSE
947	2014-2015	MH8393	HS1562	291.906939293383	FALSE	FALSE
948	2014-2015	MH8309	HS1562	86	FALSE	FALSE
949	2014-2015	HS1450	HS1562	83.9556113711946	FALSE	FALSE
950	2014-2015	MH8137	HS1562	48.005640195477	FALSE	FALSE
951	2014-2015	MH8447	HS1562	94.572484724583	FALSE	FALSE
952	2014-2015	MH8052	HS1562	16.1190406133291	FALSE	FALSE
953	2014-2015	MH8396	HS1562	18	FALSE	FALSE
954	2014-2015	MH8090	HS1562	18.995682293303	FALSE	FALSE
955	2014-2015	HS1445	HS1562	19.8751651254958	FALSE	FALSE
956	2014-2015	HS1387	HS1562	18	FALSE	FALSE
957	2014-2015	HS1367	HS1562	78.333438182677	FALSE	FALSE
958	2014-2015	HS1390	HS1562	83.2735373405292	FALSE	FALSE
959	2014-2015	HS1391	HS1562	82	FALSE	FALSE
960	2014-2015	HS1394	HS1564	92.0991157116168	FALSE	FALSE
961	2014-2015	MH7843	HS1564	92.1533996119429	FALSE	FALSE
962	2014-2015	MH8155	HS1564	84.1042411397268	FALSE	FALSE
963	2014-2015	HS1376	HS1564	88.2391437367416	FALSE	FALSE
964	2014-2015	HS1484	HS1564	92.0991157116168	FALSE	FALSE
965	2014-2015	MH8156	HS1564	392.873346204051	FALSE	FALSE
966	2014-2015	MH7505	HS1564	78.7543391389175	FALSE	FALSE
967	2014-2015	HS1255	HS1564	75.3897880392087	FALSE	FALSE
968	2014-2015	MH7796	HS1564	36.3228488113938	FALSE	FALSE
969	2014-2015	MH8165	HS1564	28.4780248996011	FALSE	FALSE
970	2014-2015	MH7492	HS1564	79.9246381193128	FALSE	FALSE
971	2014-2015	HS1340	HS1564	82.2702937634303	FALSE	FALSE
972	2014-2015	HS1413	HS1564	20.2970285456066	FALSE	FALSE
973	2014-2015	HS1448	HS1564	88.0991157116168	FALSE	FALSE
974	2014-2015	HS1393	HS1564	18.0991157116168	FALSE	FALSE
975	2014-2015	MH7890	HS1564	75.4379480405546	FALSE	FALSE
976	2014-2015	HS1345	HS1564	74.2054819420604	FALSE	FALSE
977	2014-2015	HS1369	HS1564	26.3638322342995	FALSE	FALSE
978	2014-2015	HS1336	HS1564	20.3064541485674	FALSE	FALSE
979	2014-2015	MH7612	HS1564	20.2001662563055	FALSE	FALSE
980	2014-2015	HS1377	HS1564	92.0991157116168	FALSE	FALSE
981	2014-2015	MH8589	HS1564	30.3619248193888	FALSE	FALSE
982	2014-2015	MH7845	HS1564	90.0769845454847	FALSE	FALSE
983	2014-2015	MH7891	HS1564	76.3139538759247	FALSE	FALSE
984	2014-2015	MH8126	HS1564	77.371391680227	FALSE	FALSE
985	2014-2015	MH7409	HS1564	74.0991157116168	FALSE	FALSE
986	2014-2015	MH7893	HS1564	84.2314210599225	FALSE	FALSE
987	2014-2015	HS1530	HS1564	69.072773898236	FALSE	FALSE
988	2014-2015	HS1388	HS1564	90.1420315662714	FALSE	FALSE
989	2014-2015	HS1342	HS1564	92.2210990587572	FALSE	FALSE
990	2014-2015	HS1543	HS1564	92.4637019269004	FALSE	FALSE
991	2014-2015	HS1544	HS1564	90.3876493303714	FALSE	FALSE
992	2014-2015	MH8439	HS1564	90.1477145511449	FALSE	FALSE
993	2014-2015	MH7455	HS1564	76.1704315469529	FALSE	FALSE
994	2014-2015	HS1408	HS1564	77.5274770632724	FALSE	FALSE
995	2014-2015	MH7885	HS1564	76.0991157116168	FALSE	FALSE
996	2014-2015	HS1409	HS1564	76.2359536767632	FALSE	FALSE
997	2014-2015	MH7440	HS1564	81.1520493569564	FALSE	FALSE
998	2014-2015	MH7390	HS1564	80.3627558103281	FALSE	FALSE
999	2014-2015	HS1256	HS1564	78.3235400710669	FALSE	FALSE
1000	2014-2015	MH8386	HS1564	94.3390070122518	FALSE	FALSE
1001	2014-2015	HS1507	HS1564	94.4238580865155	FALSE	FALSE
1002	2014-2015	HS1328	HS1564	20.0991157116168	FALSE	FALSE
1003	2014-2015	HS1327	HS1564	18.1791107784201	FALSE	FALSE
1004	2014-2015	HS1313	HS1564	18.5611214768128	FALSE	FALSE
1005	2014-2015	HS1250	HS1564	78.0175088794165	FALSE	FALSE
1006	2014-2015	HS1294	HS1564	78.5622119467746	FALSE	FALSE
1007	2014-2015	HS1253	HS1564	78.0991157116168	FALSE	FALSE
1008	2014-2015	HS1532	HS1564	80.0991157116168	FALSE	FALSE
1009	2014-2015	HS1455	HS1564	94.1224240011141	FALSE	FALSE
1010	2014-2015	HS1385	HS1564	292.099115711617	FALSE	FALSE
1011	2014-2015	HS1357	HS1564	90.0991157116168	FALSE	FALSE
1012	2014-2015	HS1525	HS1564	78.0991157116168	FALSE	FALSE
1013	2014-2015	HS1349	HS1564	290.576138256298	FALSE	FALSE
1014	2014-2015	HS1465	HS1564	70.0991157116168	FALSE	FALSE
1015	2014-2015	HS1463	HS1564	70.0991157116168	FALSE	FALSE
1016	2014-2015	MH8041	HS1564	70.1434033400293	FALSE	FALSE
1017	2014-2015	HS1460	HS1564	88.0991157116168	FALSE	FALSE
1018	2014-2015	HS1427	HS1564	88.3224882143304	FALSE	FALSE
1019	2014-2015	HS1375	HS1564	84.8886441871496	FALSE	FALSE
1020	2014-2015	HS1341	HS1564	84.5584753442454	FALSE	FALSE
1021	2014-2015	HS1517	HS1564	78.2366574211489	FALSE	FALSE
1022	2014-2015	HS1537	HS1564	74.0991157116168	FALSE	FALSE
1023	2014-2015	HS1509	HS1564	76.0991157116168	FALSE	FALSE
1024	2014-2015	MH8183	HS1564	85.7910949808851	FALSE	FALSE
1025	2014-2015	MH7800	HS1564	82.9596485599478	FALSE	FALSE
1026	2014-2015	MH8129	HS1564	49.5248108671429	FALSE	FALSE
1027	2014-2015	HS1392	HS1564	18.0991157116168	FALSE	FALSE
1028	2014-2015	HS1402	HS1564	78.0991157116168	FALSE	FALSE
1029	2014-2015	HS1401	HS1564	78.1678178521936	FALSE	FALSE
1030	2014-2015	HS1351	HS1564	78.1515595273833	FALSE	FALSE
1031	2014-2015	HS1487	HS1564	82.1465029071074	FALSE	FALSE
1032	2014-2015	MH8088	HS1564	77.0957913663747	FALSE	FALSE
1033	2014-2015	MH8089	HS1564	75.6374051504581	FALSE	FALSE
1034	2014-2015	HS1421	HS1564	74.5163620443408	FALSE	FALSE
1035	2014-2015	HS1473	HS1564	17.1114620461048	FALSE	FALSE
1036	2014-2015	HS1474	HS1564	84.3962801803978	FALSE	FALSE
1037	2014-2015	HS1518	HS1564	36.7533615553228	FALSE	FALSE
1038	2014-2015	HS1519	HS1564	36.1483521337346	FALSE	FALSE
1039	2014-2015	HS1520	HS1564	36.2792117107083	FALSE	FALSE
1040	2014-2015	HS1505	HS1564	2.7805448567208	FALSE	FALSE
1041	2014-2015	MH8392	HS1564	2.0991157116168	FALSE	FALSE
1042	2014-2015	HS1457	HS1564	22.3845527366608	FALSE	FALSE
1043	2014-2015	MH8354	HS1564	22.3239585157472	FALSE	FALSE
1044	2014-2015	HS1510	HS1564	23.4446925481053	FALSE	FALSE
1045	2014-2015	HS1364	HS1564	76.1805732988503	FALSE	FALSE
1046	2014-2015	HS1405	HS1564	92.0991157116168	FALSE	FALSE
1047	2014-2015	HS1425	HS1564	84.2300512107239	FALSE	FALSE
1048	2014-2015	MH8393	HS1564	292.006055005	FALSE	FALSE
1049	2014-2015	MH8309	HS1564	86.0991157116168	FALSE	FALSE
1050	2014-2015	HS1450	HS1564	84.0547270828114	FALSE	FALSE
1051	2014-2015	MH8137	HS1564	48.1047559070938	FALSE	FALSE
1052	2014-2015	MH8447	HS1564	94.6716004361998	FALSE	FALSE
1053	2014-2015	MH8052	HS1564	16.2181563249459	FALSE	FALSE
1054	2014-2015	MH8396	HS1564	18.0991157116168	FALSE	FALSE
1055	2014-2015	MH8090	HS1564	19.0947980049198	FALSE	FALSE
1056	2014-2015	HS1445	HS1564	19.9742808371126	FALSE	FALSE
1057	2014-2015	HS1387	HS1564	18.0991157116168	FALSE	FALSE
1058	2014-2015	HS1367	HS1564	78.4325538942938	FALSE	FALSE
1059	2014-2015	HS1390	HS1564	83.372653052146	FALSE	FALSE
1060	2014-2015	HS1391	HS1564	82.0991157116168	FALSE	FALSE
1061	2014-2015	HS1376	HS1394	92.1400280251248	FALSE	FALSE
1062	2014-2015	MH7505	HS1394	82.6552234273007	FALSE	FALSE
1063	2014-2015	HS1255	HS1394	79.2906723275919	FALSE	FALSE
1064	2014-2015	MH7796	HS1394	104.223733099777	FALSE	FALSE
1065	2014-2015	MH7492	HS1394	79.825522407696	FALSE	FALSE
1066	2014-2015	HS1340	HS1394	82.1711780518135	FALSE	FALSE
1067	2014-2015	HS1413	HS1394	88.1979128339898	FALSE	FALSE
1068	2014-2015	HS1393	HS1394	86	FALSE	FALSE
1069	2014-2015	MH7890	HS1394	79.3388323289378	FALSE	FALSE
1070	2014-2015	HS1345	HS1394	78.1063662304436	FALSE	FALSE
1071	2014-2015	HS1369	HS1394	94.2647165226827	FALSE	FALSE
1072	2014-2015	HS1336	HS1394	88.2073384369506	FALSE	FALSE
1073	2014-2015	MH7612	HS1394	88.1010505446887	FALSE	FALSE
1074	2014-2015	HS1377	HS1394	92	FALSE	FALSE
1075	2014-2015	MH7845	HS1394	89.9778688338679	FALSE	FALSE
1076	2014-2015	MH7409	HS1394	78	FALSE	FALSE
1077	2014-2015	HS1342	HS1394	12.1219833471404	FALSE	FALSE
1078	2014-2015	MH7455	HS1394	80.0713158353361	FALSE	FALSE
1079	2014-2015	MH7885	HS1394	80	FALSE	FALSE
1080	2014-2015	HS1409	HS1394	80.1368379651464	FALSE	FALSE
1081	2014-2015	MH7440	HS1394	85.0529336453396	FALSE	FALSE
1082	2014-2015	MH7390	HS1394	84.2636400987113	FALSE	FALSE
1083	2014-2015	HS1256	HS1394	82.2244243594501	FALSE	FALSE
1084	2014-2015	HS1328	HS1394	88	FALSE	FALSE
1085	2014-2015	HS1327	HS1394	86.0799950668033	FALSE	FALSE
1086	2014-2015	HS1313	HS1394	86.462005765196	FALSE	FALSE
1087	2014-2015	HS1250	HS1394	81.9183931677997	FALSE	FALSE
1088	2014-2015	HS1294	HS1394	82.4630962351578	FALSE	FALSE
1089	2014-2015	HS1253	HS1394	82	FALSE	FALSE
1090	2014-2015	HS1385	HS1394	292	FALSE	FALSE
1091	2014-2015	HS1357	HS1394	6	FALSE	FALSE
1092	2014-2015	HS1349	HS1394	290.477022544682	FALSE	FALSE
1093	2014-2015	HS1375	HS1394	84.7895284755328	FALSE	FALSE
1094	2014-2015	HS1341	HS1394	84.4593596326286	FALSE	FALSE
1095	2014-2015	MH7800	HS1394	82.860532848331	FALSE	FALSE
1096	2014-2015	HS1392	HS1394	86	FALSE	FALSE
1097	2014-2015	HS1402	HS1394	78	FALSE	FALSE
1098	2014-2015	HS1401	HS1394	78.0687021405768	FALSE	FALSE
1099	2014-2015	HS1351	HS1394	78.0524438157665	FALSE	FALSE
1100	2014-2015	HS1364	HS1394	76.0814575872335	FALSE	FALSE
1101	2014-2015	HS1405	HS1394	8	FALSE	FALSE
1102	2014-2015	HS1425	HS1394	20.1309354991071	FALSE	FALSE
1103	2014-2015	HS1387	HS1394	86	FALSE	FALSE
1104	2014-2015	HS1367	HS1394	82.333438182677	FALSE	FALSE
1105	2014-2015	HS1391	HS1394	82	FALSE	FALSE
1106	2014-2015	HS1376	MH7843	92.1943119254509	FALSE	FALSE
1107	2014-2015	MH7505	MH7843	82.7095073276268	FALSE	FALSE
1108	2014-2015	HS1255	MH7843	79.344956227918	FALSE	FALSE
1109	2014-2015	MH7796	MH7843	104.278017000103	FALSE	FALSE
1110	2014-2015	MH7492	MH7843	79.8798063080221	FALSE	FALSE
1111	2014-2015	HS1340	MH7843	82.2254619521396	FALSE	FALSE
1112	2014-2015	HS1413	MH7843	88.2521967343159	FALSE	FALSE
1113	2014-2015	HS1393	MH7843	86.0542839003261	FALSE	FALSE
1114	2014-2015	MH7890	MH7843	79.3931162292639	FALSE	FALSE
1115	2014-2015	HS1345	MH7843	78.1606501307697	FALSE	FALSE
1116	2014-2015	HS1369	MH7843	94.3190004230088	FALSE	FALSE
1117	2014-2015	HS1336	MH7843	88.2616223372767	FALSE	FALSE
1118	2014-2015	MH7612	MH7843	88.1553344450148	FALSE	FALSE
1119	2014-2015	HS1377	MH7843	92.0542839003261	FALSE	FALSE
1120	2014-2015	MH7845	MH7843	90.032152734194	FALSE	FALSE
1121	2014-2015	MH7409	MH7843	78.0542839003261	FALSE	FALSE
1122	2014-2015	HS1342	MH7843	12.1762672474665	FALSE	FALSE
1123	2014-2015	MH7455	MH7843	80.1255997356622	FALSE	FALSE
1124	2014-2015	MH7885	MH7843	80.0542839003261	FALSE	FALSE
1125	2014-2015	HS1409	MH7843	80.1911218654725	FALSE	FALSE
1126	2014-2015	MH7440	MH7843	85.1072175456657	FALSE	FALSE
1127	2014-2015	MH7390	MH7843	84.3179239990374	FALSE	FALSE
1128	2014-2015	HS1256	MH7843	82.2787082597762	FALSE	FALSE
1129	2014-2015	HS1328	MH7843	88.0542839003261	FALSE	FALSE
1130	2014-2015	HS1327	MH7843	86.1342789671294	FALSE	FALSE
1131	2014-2015	HS1313	MH7843	86.5162896655221	FALSE	FALSE
1132	2014-2015	HS1250	MH7843	81.9726770681258	FALSE	FALSE
1133	2014-2015	HS1294	MH7843	82.5173801354839	FALSE	FALSE
1134	2014-2015	HS1253	MH7843	82.0542839003261	FALSE	FALSE
1135	2014-2015	HS1385	MH7843	292.054283900326	FALSE	FALSE
1136	2014-2015	HS1357	MH7843	6.0542839003261	FALSE	FALSE
1137	2014-2015	HS1349	MH7843	290.531306445008	FALSE	FALSE
1138	2014-2015	HS1375	MH7843	84.8438123758589	FALSE	FALSE
1139	2014-2015	HS1341	MH7843	84.5136435329547	FALSE	FALSE
1140	2014-2015	MH7800	MH7843	82.9148167486571	FALSE	FALSE
1141	2014-2015	HS1392	MH7843	86.0542839003261	FALSE	FALSE
1142	2014-2015	HS1402	MH7843	78.0542839003261	FALSE	FALSE
1143	2014-2015	HS1401	MH7843	78.1229860409029	FALSE	FALSE
1144	2014-2015	HS1351	MH7843	78.1067277160926	FALSE	FALSE
1145	2014-2015	HS1364	MH7843	76.1357414875596	FALSE	FALSE
1146	2014-2015	HS1405	MH7843	8.0542839003261	FALSE	FALSE
1147	2014-2015	HS1425	MH7843	20.1852193994332	FALSE	FALSE
1148	2014-2015	HS1387	MH7843	86.0542839003261	FALSE	FALSE
1149	2014-2015	HS1367	MH7843	82.3877220830031	FALSE	FALSE
1150	2014-2015	HS1391	MH7843	82.0542839003261	FALSE	FALSE
1151	2014-2015	HS1563	MH8692	72.0781258058101	FALSE	FALSE
1152	2014-2015	HS1562	MH8692	71.6994747817394	FALSE	FALSE
1153	2014-2015	HS1564	MH8692	71.7985904933562	FALSE	FALSE
1154	2014-2015	HS1394	MH8692	79.6994747817394	FALSE	FALSE
1155	2014-2015	MH7843	MH8692	79.7537586820655	FALSE	FALSE
1156	2014-2015	MH8155	MH8692	19.7046002098494	FALSE	FALSE
1157	2014-2015	HS1376	MH8692	23.8395028068642	FALSE	FALSE
1158	2014-2015	HS1484	MH8692	78.9054209278694	FALSE	FALSE
1159	2014-2015	MH8156	MH8692	379.124136190993	FALSE	FALSE
1160	2014-2015	HS1567	MH8692	15.6994747817394	FALSE	FALSE
1161	2014-2015	MH7505	MH8692	14.3546982090401	FALSE	FALSE
1162	2014-2015	HS1255	MH8692	10.9901471093313	FALSE	FALSE
1163	2014-2015	MH7796	MH8692	83.9232078815164	FALSE	FALSE
1164	2014-2015	MH8165	MH8692	76.0783839697237	FALSE	FALSE
1165	2014-2015	MH7492	MH8692	31.5249971894354	FALSE	FALSE
1166	2014-2015	HS1340	MH8692	33.8706528335529	FALSE	FALSE
1167	2014-2015	HS1413	MH8692	67.8973876157292	FALSE	FALSE
1168	2014-2015	HS1448	MH8692	23.6994747817394	FALSE	FALSE
1169	2014-2015	HS1393	MH8692	65.6994747817394	FALSE	FALSE
1170	2014-2015	MH8586	MH8692	71.3639405680534	FALSE	FALSE
1171	2014-2015	MH7890	MH8692	11.0383071106772	FALSE	FALSE
1172	2014-2015	HS1345	MH8692	9.805841012183	FALSE	FALSE
1173	2014-2015	HS1369	MH8692	73.9641913044221	FALSE	FALSE
1174	2014-2015	HS1336	MH8692	67.90681321869	FALSE	FALSE
1175	2014-2015	MH7612	MH8692	67.8005253264281	FALSE	FALSE
1176	2014-2015	HS1377	MH8692	78.9054209278694	FALSE	FALSE
1177	2014-2015	MH8589	MH8692	77.9622838895114	FALSE	FALSE
1178	2014-2015	MH7845	MH8692	77.6773436156073	FALSE	FALSE
1179	2014-2015	MH7891	MH8692	11.9143129460473	FALSE	FALSE
1180	2014-2015	MH8126	MH8692	12.9717507503496	FALSE	FALSE
1181	2014-2015	MH7409	MH8692	9.6994747817394	FALSE	FALSE
1182	2014-2015	MH7893	MH8692	19.8317801300451	FALSE	FALSE
1183	2014-2015	HS1530	MH8692	77.3642724795246	FALSE	FALSE
1184	2014-2015	HS1388	MH8692	77.742390636394	FALSE	FALSE
1185	2014-2015	HS1342	MH8692	79.8214581288798	FALSE	FALSE
1186	2014-2015	HS1543	MH8692	80.064060997023	FALSE	FALSE
1187	2014-2015	HS1544	MH8692	77.988008400494	FALSE	FALSE
1188	2014-2015	MH8439	MH8692	77.7480736212675	FALSE	FALSE
1189	2014-2015	MH7455	MH8692	11.7707906170755	FALSE	FALSE
1190	2014-2015	HS1408	MH8692	13.127836133395	FALSE	FALSE
1191	2014-2015	MH7885	MH8692	11.6994747817394	FALSE	FALSE
1192	2014-2015	HS1409	MH8692	11.8363127468858	FALSE	FALSE
1193	2014-2015	MH7440	MH8692	16.752408427079	FALSE	FALSE
1194	2014-2015	MH7390	MH8692	15.9631148804507	FALSE	FALSE
1195	2014-2015	HS1256	MH8692	13.9238991411895	FALSE	FALSE
1196	2014-2015	MH8386	MH8692	77.1453122285044	FALSE	FALSE
1197	2014-2015	HS1507	MH8692	77.2301633027681	FALSE	FALSE
1198	2014-2015	HS1328	MH8692	67.6994747817394	FALSE	FALSE
1199	2014-2015	HS1327	MH8692	65.7794698485427	FALSE	FALSE
1200	2014-2015	HS1313	MH8692	66.1614805469354	FALSE	FALSE
1201	2014-2015	HS1250	MH8692	13.6178679495391	FALSE	FALSE
1202	2014-2015	HS1294	MH8692	14.1625710168972	FALSE	FALSE
1203	2014-2015	HS1253	MH8692	13.6994747817394	FALSE	FALSE
1204	2014-2015	HS1532	MH8692	19.6994747817394	FALSE	FALSE
1205	2014-2015	HS1455	MH8692	80.9287292173667	FALSE	FALSE
1206	2014-2015	HS1385	MH8692	279.699474781739	FALSE	FALSE
1207	2014-2015	HS1357	MH8692	77.6994747817394	FALSE	FALSE
1208	2014-2015	HS1525	MH8692	64.9054209278694	FALSE	FALSE
1209	2014-2015	HS1349	MH8692	278.176497326421	FALSE	FALSE
1210	2014-2015	HS1465	MH8692	69.6994747817394	FALSE	FALSE
1211	2014-2015	HS1463	MH8692	69.6994747817394	FALSE	FALSE
1212	2014-2015	MH8041	MH8692	69.7437624101519	FALSE	FALSE
1213	2014-2015	HS1460	MH8692	74.9054209278694	FALSE	FALSE
1214	2014-2015	HS1427	MH8692	75.128793430583	FALSE	FALSE
1215	2014-2015	HS1375	MH8692	36.4890032572722	FALSE	FALSE
1216	2014-2015	HS1341	MH8692	36.158834414368	FALSE	FALSE
1217	2014-2015	HS1517	MH8692	77.8370164912715	FALSE	FALSE
1218	2014-2015	HS1537	MH8692	9.6994747817394	FALSE	FALSE
1219	2014-2015	HS1509	MH8692	11.6994747817394	FALSE	FALSE
1220	2014-2015	MH8183	MH8692	73.5001282837557	FALSE	FALSE
1221	2014-2015	MH7800	MH8692	34.5600076300704	FALSE	FALSE
1222	2014-2015	MH8129	MH8692	49.1251699372655	FALSE	FALSE
1223	2014-2015	HS1392	MH8692	65.6994747817394	FALSE	FALSE
1224	2014-2015	HS1402	MH8692	64.9054209278694	FALSE	FALSE
1225	2014-2015	HS1401	MH8692	64.9741230684462	FALSE	FALSE
1226	2014-2015	HS1351	MH8692	64.9578647436359	FALSE	FALSE
1227	2014-2015	HS1487	MH8692	17.74686197723	FALSE	FALSE
1228	2014-2015	MH8088	MH8692	12.6961504364973	FALSE	FALSE
1229	2014-2015	MH8089	MH8692	11.2377642205807	FALSE	FALSE
1230	2014-2015	HS1421	MH8692	10.1167211144634	FALSE	FALSE
1231	2014-2015	HS1473	MH8692	64.7118211162274	FALSE	FALSE
1232	2014-2015	HS1474	MH8692	35.9966392505204	FALSE	FALSE
1233	2014-2015	HS1518	MH8692	84.3537206254454	FALSE	FALSE
1234	2014-2015	HS1519	MH8692	83.7487112038572	FALSE	FALSE
1235	2014-2015	HS1520	MH8692	83.8795707808309	FALSE	FALSE
1236	2014-2015	HS1505	MH8692	70.3809039268434	FALSE	FALSE
1237	2014-2015	MH8392	MH8692	69.6994747817394	FALSE	FALSE
1238	2014-2015	HS1457	MH8692	69.9849118067834	FALSE	FALSE
1239	2014-2015	MH8354	MH8692	69.9243175858698	FALSE	FALSE
1240	2014-2015	HS1510	MH8692	72.8746729025679	FALSE	FALSE
1241	2014-2015	HS1364	MH8692	27.7809323689729	FALSE	FALSE
1242	2014-2015	HS1405	MH8692	79.6994747817394	FALSE	FALSE
1243	2014-2015	HS1425	MH8692	71.8304102808465	FALSE	FALSE
1244	2014-2015	HS1535	MH8692	22.190261108578	FALSE	FALSE
1245	2014-2015	MH8393	MH8692	279.606414075123	FALSE	FALSE
1246	2014-2015	MH8309	MH8692	21.6994747817394	FALSE	FALSE
1247	2014-2015	HS1450	MH8692	19.655086152934	FALSE	FALSE
1248	2014-2015	MH8137	MH8692	65.7456909648944	FALSE	FALSE
1249	2014-2015	MH8447	MH8692	66.2719595063224	FALSE	FALSE
1250	2014-2015	MH8052	MH8692	67.8185153950685	FALSE	FALSE
1251	2014-2015	MH8396	MH8692	65.6994747817394	FALSE	FALSE
1252	2014-2015	MH8090	MH8692	66.6951570750424	FALSE	FALSE
1253	2014-2015	HS1445	MH8692	67.5746399072352	FALSE	FALSE
1254	2014-2015	HS1387	MH8692	65.6994747817394	FALSE	FALSE
1255	2014-2015	HS1367	MH8692	14.0329129644164	FALSE	FALSE
1256	2014-2015	HS1390	MH8692	70.1789582683986	FALSE	FALSE
1257	2014-2015	HS1391	MH8692	68.9054209278694	FALSE	FALSE
1258	2014-2015	HS1394	MH8155	88.00512542811	FALSE	FALSE
1259	2014-2015	MH7843	MH8155	88.0594093284361	FALSE	FALSE
1260	2014-2015	HS1376	MH8155	32.1451534532348	FALSE	FALSE
1261	2014-2015	MH8156	MH8155	386.779355920544	FALSE	FALSE
1262	2014-2015	MH7505	MH8155	22.6603488554107	FALSE	FALSE
1263	2014-2015	HS1255	MH8155	19.2957977557019	FALSE	FALSE
1264	2014-2015	MH7796	MH8155	96.228858527887	FALSE	FALSE
1265	2014-2015	MH8165	MH8155	88.3840346160943	FALSE	FALSE
1266	2014-2015	MH7492	MH8155	39.830647835806	FALSE	FALSE
1267	2014-2015	HS1340	MH8155	42.1763034799235	FALSE	FALSE
1268	2014-2015	HS1413	MH8155	80.2030382620998	FALSE	FALSE
1269	2014-2015	HS1448	MH8155	29.329396154826	FALSE	FALSE
1270	2014-2015	HS1393	MH8155	78.00512542811	FALSE	FALSE
1271	2014-2015	MH7890	MH8155	19.3439577570478	FALSE	FALSE
1272	2014-2015	HS1345	MH8155	18.1114916585536	FALSE	FALSE
1273	2014-2015	HS1369	MH8155	86.2698419507927	FALSE	FALSE
1274	2014-2015	HS1336	MH8155	80.2124638650606	FALSE	FALSE
1275	2014-2015	MH7612	MH8155	80.1061759727987	FALSE	FALSE
1276	2014-2015	HS1377	MH8155	84.00512542811	FALSE	FALSE
1277	2014-2015	MH7845	MH8155	85.9829942619779	FALSE	FALSE
1278	2014-2015	MH7891	MH8155	20.2199635924179	FALSE	FALSE
1279	2014-2015	MH8126	MH8155	21.2774013967202	FALSE	FALSE
1280	2014-2015	MH7409	MH8155	18.00512542811	FALSE	FALSE
1281	2014-2015	MH7893	MH8155	28.1374307764157	FALSE	FALSE
1282	2014-2015	HS1388	MH8155	86.0480412827646	FALSE	FALSE
1283	2014-2015	HS1342	MH8155	88.1271087752504	FALSE	FALSE
1284	2014-2015	MH7455	MH8155	20.0764412634461	FALSE	FALSE
1285	2014-2015	HS1408	MH8155	20.6296295782876	FALSE	FALSE
1286	2014-2015	MH7885	MH8155	20.00512542811	FALSE	FALSE
1287	2014-2015	HS1409	MH8155	20.1419633932564	FALSE	FALSE
1288	2014-2015	MH7440	MH8155	25.0580590734496	FALSE	FALSE
1289	2014-2015	MH7390	MH8155	24.2687655268213	FALSE	FALSE
1290	2014-2015	HS1256	MH8155	22.2295497875601	FALSE	FALSE
1291	2014-2015	HS1328	MH8155	80.00512542811	FALSE	FALSE
1292	2014-2015	HS1327	MH8155	78.0851204949133	FALSE	FALSE
1293	2014-2015	HS1313	MH8155	78.467131193306	FALSE	FALSE
1294	2014-2015	HS1250	MH8155	21.9235185959097	FALSE	FALSE
1295	2014-2015	HS1294	MH8155	22.4682216632678	FALSE	FALSE
1296	2014-2015	HS1253	MH8155	22.00512542811	FALSE	FALSE
1297	2014-2015	HS1455	MH8155	90.0284337176073	FALSE	FALSE
1298	2014-2015	HS1385	MH8155	288.00512542811	FALSE	FALSE
1299	2014-2015	HS1357	MH8155	86.00512542811	FALSE	FALSE
1300	2014-2015	HS1349	MH8155	286.482147972792	FALSE	FALSE
1301	2014-2015	HS1463	MH8155	78.00512542811	FALSE	FALSE
1302	2014-2015	MH8041	MH8155	78.0494130565225	FALSE	FALSE
1303	2014-2015	HS1460	MH8155	84.00512542811	FALSE	FALSE
1304	2014-2015	HS1427	MH8155	84.2284979308236	FALSE	FALSE
1305	2014-2015	HS1375	MH8155	44.7946539036428	FALSE	FALSE
1306	2014-2015	HS1341	MH8155	44.4644850607386	FALSE	FALSE
1307	2014-2015	MH8183	MH8155	81.8057789301263	FALSE	FALSE
1308	2014-2015	MH7800	MH8155	42.865658276441	FALSE	FALSE
1309	2014-2015	MH8129	MH8155	61.4308205836361	FALSE	FALSE
1310	2014-2015	HS1392	MH8155	78.00512542811	FALSE	FALSE
1311	2014-2015	HS1402	MH8155	70.00512542811	FALSE	FALSE
1312	2014-2015	HS1401	MH8155	70.0738275686868	FALSE	FALSE
1313	2014-2015	HS1351	MH8155	70.0575692438765	FALSE	FALSE
1314	2014-2015	MH8088	MH8155	25.0018010828679	FALSE	FALSE
1315	2014-2015	MH8089	MH8155	23.5434148669513	FALSE	FALSE
1316	2014-2015	HS1421	MH8155	18.422371760834	FALSE	FALSE
1317	2014-2015	HS1457	MH8155	82.290562453154	FALSE	FALSE
1318	2014-2015	HS1364	MH8155	36.0865830153435	FALSE	FALSE
1319	2014-2015	HS1405	MH8155	88.00512542811	FALSE	FALSE
1320	2014-2015	HS1425	MH8155	80.1360609272171	FALSE	FALSE
1321	2014-2015	HS1450	MH8155	27.9607367993046	FALSE	FALSE
1322	2014-2015	MH8052	MH8155	80.1241660414391	FALSE	FALSE
1323	2014-2015	MH8090	MH8155	79.000807721413	FALSE	FALSE
1324	2014-2015	HS1387	MH8155	78.00512542811	FALSE	FALSE
1325	2014-2015	HS1367	MH8155	22.338563610787	FALSE	FALSE
1326	2014-2015	HS1390	MH8155	75.2786627686392	FALSE	FALSE
1327	2014-2015	HS1391	MH8155	74.00512542811	FALSE	FALSE
1328	2014-2015	MH7505	HS1376	22.7952514524255	FALSE	FALSE
1329	2014-2015	HS1255	HS1376	19.4307003527167	FALSE	FALSE
1330	2014-2015	MH7492	HS1376	43.9655504328208	FALSE	FALSE
1331	2014-2015	HS1340	HS1376	46.3112060769383	FALSE	FALSE
1332	2014-2015	HS1345	HS1376	22.2463942555684	FALSE	FALSE
1333	2014-2015	HS1369	HS1376	90.4047445478075	FALSE	FALSE
1334	2014-2015	HS1336	HS1376	84.3473664620754	FALSE	FALSE
1335	2014-2015	MH7612	HS1376	84.2410785698135	FALSE	FALSE
1336	2014-2015	MH7409	HS1376	18.1400280251248	FALSE	FALSE
1337	2014-2015	HS1342	HS1376	92.2620113722652	FALSE	FALSE
1338	2014-2015	MH7455	HS1376	24.2113438604609	FALSE	FALSE
1339	2014-2015	MH7440	HS1376	29.1929616704644	FALSE	FALSE
1340	2014-2015	MH7390	HS1376	28.4036681238361	FALSE	FALSE
1341	2014-2015	HS1256	HS1376	26.3644523845749	FALSE	FALSE
1342	2014-2015	HS1328	HS1376	84.1400280251248	FALSE	FALSE
1343	2014-2015	HS1327	HS1376	82.2200230919281	FALSE	FALSE
1344	2014-2015	HS1313	HS1376	82.6020337903208	FALSE	FALSE
1345	2014-2015	HS1250	HS1376	26.0584211929245	FALSE	FALSE
1346	2014-2015	HS1294	HS1376	26.6031242602826	FALSE	FALSE
1347	2014-2015	HS1253	HS1376	26.1400280251248	FALSE	FALSE
1348	2014-2015	HS1357	HS1376	90.1400280251248	FALSE	FALSE
1349	2014-2015	HS1349	HS1376	290.617050569806	FALSE	FALSE
1350	2014-2015	HS1341	HS1376	48.5993876577534	FALSE	FALSE
1351	2014-2015	HS1351	HS1376	78.1924718408913	FALSE	FALSE
1352	2014-2015	HS1364	HS1376	40.2214856123583	FALSE	FALSE
1353	2014-2015	HS1387	HS1376	82.1400280251248	FALSE	FALSE
1354	2014-2015	HS1367	HS1376	26.4734662078018	FALSE	FALSE
1355	2014-2015	HS1563	HS1604	98.3106685046097	FALSE	FALSE
1356	2014-2015	HS1562	HS1604	97.932017480539	FALSE	FALSE
1357	2014-2015	HS1564	HS1604	98.0311331921558	FALSE	FALSE
1358	2014-2015	HS1394	HS1604	93.932017480539	FALSE	FALSE
1359	2014-2015	MH7843	HS1604	93.9863013808651	FALSE	FALSE
1360	2014-2015	MH8692	HS1604	81.6314922622784	FALSE	FALSE
1361	2014-2015	MH8155	HS1604	89.937142908649	FALSE	FALSE
1362	2014-2015	HS1376	HS1604	94.0720455056638	FALSE	FALSE
1363	2014-2015	HS1484	HS1604	97.932017480539	FALSE	FALSE
1364	2014-2015	MH8156	HS1604	390.787466247085	FALSE	FALSE
1365	2014-2015	HS1567	HS1604	89.932017480539	FALSE	FALSE
1366	2014-2015	MH8700	HS1604	89.9815105799561	FALSE	FALSE
1367	2014-2015	MH7505	HS1604	84.5872409078397	FALSE	FALSE
1368	2014-2015	HS1255	HS1604	81.2226898081309	FALSE	FALSE
1369	2014-2015	MH7796	HS1604	110.155750580316	FALSE	FALSE
1370	2014-2015	MH8165	HS1604	102.310926668523	FALSE	FALSE
1371	2014-2015	MH7492	HS1604	81.757539888235	FALSE	FALSE
1372	2014-2015	HS1340	HS1604	84.1031955323525	FALSE	FALSE
1373	2014-2015	HS1413	HS1604	94.1299303145288	FALSE	FALSE
1374	2014-2015	HS1448	HS1604	93.932017480539	FALSE	FALSE
1375	2014-2015	MH8766	HS1604	368.103181710456	FALSE	FALSE
1376	2014-2015	HS1393	HS1604	91.932017480539	FALSE	FALSE
1377	2014-2015	MH8586	HS1604	97.596483266853	FALSE	FALSE
1378	2014-2015	MH7890	HS1604	81.2708498094768	FALSE	FALSE
1379	2014-2015	HS1345	HS1604	80.0383837109826	FALSE	FALSE
1380	2014-2015	HS1369	HS1604	100.196734003222	FALSE	FALSE
1381	2014-2015	HS1336	HS1604	94.1393559174896	FALSE	FALSE
1382	2014-2015	MH7612	HS1604	94.0330680252277	FALSE	FALSE
1383	2014-2015	HS1377	HS1604	97.932017480539	FALSE	FALSE
1384	2014-2015	MH8589	HS1604	104.194826588311	FALSE	FALSE
1385	2014-2015	MH7845	HS1604	95.9098863144069	FALSE	FALSE
1386	2014-2015	MH7891	HS1604	82.1468556448469	FALSE	FALSE
1387	2014-2015	MH8126	HS1604	83.2042934491492	FALSE	FALSE
1388	2014-2015	MH7409	HS1604	79.932017480539	FALSE	FALSE
1389	2014-2015	MH7893	HS1604	90.0643228288447	FALSE	FALSE
1390	2014-2015	MH8592	HS1604	95.0948858691783	FALSE	FALSE
1391	2014-2015	HS1530	HS1604	99.6711894112721	FALSE	FALSE
1392	2014-2015	HS1388	HS1604	91.9749333351936	FALSE	FALSE
1393	2014-2015	HS1342	HS1604	94.0540008276794	FALSE	FALSE
1394	2014-2015	HS1543	HS1604	94.2966036958226	FALSE	FALSE
1395	2014-2015	HS1544	HS1604	92.2205510992936	FALSE	FALSE
1396	2014-2015	MH8439	HS1604	91.9806163200671	FALSE	FALSE
1397	2014-2015	MH7455	HS1604	82.0033333158751	FALSE	FALSE
1398	2014-2015	HS1408	HS1604	83.3603788321946	FALSE	FALSE
1399	2014-2015	MH7885	HS1604	81.932017480539	FALSE	FALSE
1400	2014-2015	HS1409	HS1604	82.0688554456854	FALSE	FALSE
1401	2014-2015	MH7440	HS1604	86.9849511258786	FALSE	FALSE
1402	2014-2015	MH7390	HS1604	86.1956575792503	FALSE	FALSE
1403	2014-2015	HS1256	HS1604	84.1564418399891	FALSE	FALSE
1404	2014-2015	MH8386	HS1604	100.171908781174	FALSE	FALSE
1405	2014-2015	HS1507	HS1604	100.256759855438	FALSE	FALSE
1406	2014-2015	HS1328	HS1604	93.932017480539	FALSE	FALSE
1407	2014-2015	HS1327	HS1604	92.0120125473423	FALSE	FALSE
1408	2014-2015	HS1313	HS1604	92.394023245735	FALSE	FALSE
1409	2014-2015	HS1250	HS1604	83.8504106483387	FALSE	FALSE
1410	2014-2015	HS1294	HS1604	84.3951137156968	FALSE	FALSE
1411	2014-2015	HS1253	HS1604	83.932017480539	FALSE	FALSE
1412	2014-2015	HS1532	HS1604	89.932017480539	FALSE	FALSE
1413	2014-2015	HS1455	HS1604	99.9553257700363	FALSE	FALSE
1414	2014-2015	HS1385	HS1604	297.932017480539	FALSE	FALSE
1415	2014-2015	HS1357	HS1604	91.932017480539	FALSE	FALSE
1416	2014-2015	HS1596	HS1604	99.9861745072478	FALSE	FALSE
1417	2014-2015	HS1525	HS1604	83.932017480539	FALSE	FALSE
1418	2014-2015	HS1349	HS1604	296.409040025221	FALSE	FALSE
1419	2014-2015	HS1465	HS1604	87.932017480539	FALSE	FALSE
1420	2014-2015	HS1463	HS1604	87.932017480539	FALSE	FALSE
1421	2014-2015	MH8041	HS1604	87.9763051089515	FALSE	FALSE
1422	2014-2015	HS1460	HS1604	93.932017480539	FALSE	FALSE
1423	2014-2015	HS1427	HS1604	94.1553899832526	FALSE	FALSE
1424	2014-2015	HS1375	HS1604	86.7215459560718	FALSE	FALSE
1425	2014-2015	HS1341	HS1604	86.3913771131676	FALSE	FALSE
1426	2014-2015	HS1517	HS1604	96.0695591900711	FALSE	FALSE
1427	2014-2015	HS1537	HS1604	79.932017480539	FALSE	FALSE
1428	2014-2015	HS1509	HS1604	81.932017480539	FALSE	FALSE
1429	2014-2015	MH8183	HS1604	87.7326709825553	FALSE	FALSE
1430	2014-2015	MH7800	HS1604	84.79255032887	FALSE	FALSE
1431	2014-2015	MH8714	HS1604	99.932017480539	FALSE	FALSE
1432	2014-2015	MH8129	HS1604	99.3577126360651	FALSE	FALSE
1433	2014-2015	HS1392	HS1604	91.932017480539	FALSE	FALSE
1434	2014-2015	HS1402	HS1604	83.932017480539	FALSE	FALSE
1435	2014-2015	HS1401	HS1604	84.0007196211158	FALSE	FALSE
1436	2014-2015	HS1351	HS1604	83.9844612963055	FALSE	FALSE
1437	2014-2015	MH8924	HS1604	88.2691106496344	FALSE	FALSE
1438	2014-2015	HS1595	HS1604	88.3898262959018	FALSE	FALSE
1439	2014-2015	HS1487	HS1604	87.9794046760296	FALSE	FALSE
1440	2014-2015	MH8088	HS1604	86.9286931352969	FALSE	FALSE
1441	2014-2015	MH8089	HS1604	85.4703069193803	FALSE	FALSE
1442	2014-2015	HS1421	HS1604	80.349263813263	FALSE	FALSE
1443	2014-2015	HS1473	HS1604	90.944363815027	FALSE	FALSE
1444	2014-2015	HS1474	HS1604	86.22918194932	FALSE	FALSE
1445	2014-2015	HS1518	HS1604	110.586263324245	FALSE	FALSE
1446	2014-2015	HS1519	HS1604	109.981253902657	FALSE	FALSE
1447	2014-2015	HS1520	HS1604	110.11211347963	FALSE	FALSE
1448	2014-2015	HS1505	HS1604	96.613446625643	FALSE	FALSE
1449	2014-2015	MH8392	HS1604	95.932017480539	FALSE	FALSE
1450	2014-2015	HS1457	HS1604	96.217454505583	FALSE	FALSE
1451	2014-2015	MH8354	HS1604	96.1568602846694	FALSE	FALSE
1452	2014-2015	HS1510	HS1604	99.1072156013675	FALSE	FALSE
1453	2014-2015	HS1364	HS1604	78.0134750677725	FALSE	FALSE
1454	2014-2015	HS1405	HS1604	93.932017480539	FALSE	FALSE
1455	2014-2015	HS1425	HS1604	86.0629529796461	FALSE	FALSE
1456	2014-2015	HS1536	HS1604	90.0979934484843	FALSE	FALSE
1457	2014-2015	HS1535	HS1604	88.4228038073776	FALSE	FALSE
1458	2014-2015	MH8393	HS1604	297.838956773922	FALSE	FALSE
1459	2014-2015	MH8309	HS1604	91.932017480539	FALSE	FALSE
1460	2014-2015	HS1450	HS1604	89.8876288517336	FALSE	FALSE
1461	2014-2015	MH8137	HS1604	95.123356137734	FALSE	FALSE
1462	2014-2015	MH8447	HS1604	100.504502205122	FALSE	FALSE
1463	2014-2015	MH8052	HS1604	94.0510580938681	FALSE	FALSE
1464	2014-2015	MH8396	HS1604	91.932017480539	FALSE	FALSE
1465	2014-2015	HS1573	HS1604	98.3924075258061	FALSE	FALSE
1466	2014-2015	MH8090	HS1604	92.927699773842	FALSE	FALSE
1467	2014-2015	HS1445	HS1604	93.8071826060348	FALSE	FALSE
1468	2014-2015	HS1387	HS1604	91.932017480539	FALSE	FALSE
1469	2014-2015	HS1367	HS1604	84.265455663216	FALSE	FALSE
1470	2014-2015	HS1390	HS1604	89.2055548210682	FALSE	FALSE
1471	2014-2015	HS1391	HS1604	87.932017480539	FALSE	FALSE
1472	2014-2015	HS1394	HS1484	92	FALSE	FALSE
1473	2014-2015	MH7843	HS1484	92.0542839003261	FALSE	FALSE
1474	2014-2015	MH8155	HS1484	84.00512542811	FALSE	FALSE
1475	2014-2015	HS1376	HS1484	92.1400280251248	FALSE	FALSE
1476	2014-2015	MH8156	HS1484	390.774230492434	FALSE	FALSE
1477	2014-2015	MH7505	HS1484	82.6552234273007	FALSE	FALSE
1478	2014-2015	HS1255	HS1484	79.2906723275919	FALSE	FALSE
1479	2014-2015	MH7796	HS1484	104.223733099777	FALSE	FALSE
1480	2014-2015	MH8165	HS1484	96.3789091879843	FALSE	FALSE
1481	2014-2015	MH7492	HS1484	79.825522407696	FALSE	FALSE
1482	2014-2015	HS1340	HS1484	82.1711780518135	FALSE	FALSE
1483	2014-2015	HS1413	HS1484	88.1979128339898	FALSE	FALSE
1484	2014-2015	HS1448	HS1484	92	FALSE	FALSE
1485	2014-2015	HS1393	HS1484	86	FALSE	FALSE
1486	2014-2015	MH7890	HS1484	79.3388323289378	FALSE	FALSE
1487	2014-2015	HS1345	HS1484	78.1063662304436	FALSE	FALSE
1488	2014-2015	HS1369	HS1484	94.2647165226827	FALSE	FALSE
1489	2014-2015	HS1336	HS1484	88.2073384369506	FALSE	FALSE
1490	2014-2015	MH7612	HS1484	88.1010505446887	FALSE	FALSE
1491	2014-2015	HS1377	HS1484	28	FALSE	FALSE
1492	2014-2015	MH7845	HS1484	89.9778688338679	FALSE	FALSE
1493	2014-2015	MH7891	HS1484	80.2148381643079	FALSE	FALSE
1494	2014-2015	MH8126	HS1484	81.2722759686102	FALSE	FALSE
1495	2014-2015	MH7409	HS1484	78	FALSE	FALSE
1496	2014-2015	MH7893	HS1484	88.1323053483057	FALSE	FALSE
1497	2014-2015	HS1388	HS1484	90.0429158546546	FALSE	FALSE
1498	2014-2015	HS1342	HS1484	92.1219833471404	FALSE	FALSE
1499	2014-2015	MH7455	HS1484	80.0713158353361	FALSE	FALSE
1500	2014-2015	HS1408	HS1484	81.4283613516556	FALSE	FALSE
1501	2014-2015	MH7885	HS1484	80	FALSE	FALSE
1502	2014-2015	HS1409	HS1484	80.1368379651464	FALSE	FALSE
1503	2014-2015	MH7440	HS1484	85.0529336453396	FALSE	FALSE
1504	2014-2015	MH7390	HS1484	84.2636400987113	FALSE	FALSE
1505	2014-2015	HS1256	HS1484	82.2244243594501	FALSE	FALSE
1506	2014-2015	HS1328	HS1484	88	FALSE	FALSE
1507	2014-2015	HS1327	HS1484	86.0799950668033	FALSE	FALSE
1508	2014-2015	HS1313	HS1484	86.462005765196	FALSE	FALSE
1509	2014-2015	HS1250	HS1484	81.9183931677997	FALSE	FALSE
1510	2014-2015	HS1294	HS1484	82.4630962351578	FALSE	FALSE
1511	2014-2015	HS1253	HS1484	82	FALSE	FALSE
1512	2014-2015	HS1455	HS1484	62.0233082894973	FALSE	FALSE
1513	2014-2015	HS1385	HS1484	292	FALSE	FALSE
1514	2014-2015	HS1357	HS1484	90	FALSE	FALSE
1515	2014-2015	HS1349	HS1484	290.477022544682	FALSE	FALSE
1516	2014-2015	HS1465	HS1484	82	FALSE	FALSE
1517	2014-2015	HS1463	HS1484	82	FALSE	FALSE
1518	2014-2015	MH8041	HS1484	82.0442876284125	FALSE	FALSE
1519	2014-2015	HS1460	HS1484	56	FALSE	FALSE
1520	2014-2015	HS1427	HS1484	56.2233725027136	FALSE	FALSE
1521	2014-2015	HS1375	HS1484	84.7895284755328	FALSE	FALSE
1522	2014-2015	HS1341	HS1484	84.4593596326286	FALSE	FALSE
1523	2014-2015	MH8183	HS1484	85.8006535020163	FALSE	FALSE
1524	2014-2015	MH7800	HS1484	82.860532848331	FALSE	FALSE
1525	2014-2015	MH8129	HS1484	97.4256951555261	FALSE	FALSE
1526	2014-2015	HS1392	HS1484	86	FALSE	FALSE
1527	2014-2015	HS1402	HS1484	30	FALSE	FALSE
1528	2014-2015	HS1401	HS1484	30.0687021405768	FALSE	FALSE
1529	2014-2015	HS1351	HS1484	30.0524438157665	FALSE	FALSE
1530	2014-2015	HS1487	HS1484	86.0473871954906	FALSE	FALSE
1531	2014-2015	MH8088	HS1484	84.9966756547579	FALSE	FALSE
1532	2014-2015	MH8089	HS1484	83.5382894388413	FALSE	FALSE
1533	2014-2015	HS1421	HS1484	78.417246332724	FALSE	FALSE
1534	2014-2015	HS1473	HS1484	85.012346334488	FALSE	FALSE
1535	2014-2015	HS1474	HS1484	84.297164468781	FALSE	FALSE
1536	2014-2015	MH8392	HS1484	90	FALSE	FALSE
1537	2014-2015	HS1457	HS1484	90.285437025044	FALSE	FALSE
1538	2014-2015	HS1364	HS1484	76.0814575872335	FALSE	FALSE
1539	2014-2015	HS1405	HS1484	92	FALSE	FALSE
1540	2014-2015	HS1425	HS1484	84.1309354991071	FALSE	FALSE
1541	2014-2015	MH8309	HS1484	90	FALSE	FALSE
1542	2014-2015	HS1450	HS1484	87.9556113711946	FALSE	FALSE
1543	2014-2015	MH8137	HS1484	90.802820503495	FALSE	FALSE
1544	2014-2015	MH8052	HS1484	88.1190406133291	FALSE	FALSE
1545	2014-2015	MH8090	HS1484	86.995682293303	FALSE	FALSE
1546	2014-2015	HS1445	HS1484	87.8751651254958	FALSE	FALSE
1547	2014-2015	HS1387	HS1484	86	FALSE	FALSE
1548	2014-2015	HS1367	HS1484	82.333438182677	FALSE	FALSE
1549	2014-2015	HS1390	HS1484	35.2735373405292	FALSE	FALSE
1550	2014-2015	HS1391	HS1484	34	FALSE	FALSE
1551	2014-2015	HS1394	MH8156	392.774230492434	FALSE	FALSE
1552	2014-2015	MH7843	MH8156	392.82851439276	FALSE	FALSE
1553	2014-2015	HS1376	MH8156	390.914258517559	FALSE	FALSE
1554	2014-2015	MH7505	MH8156	381.429453919735	FALSE	FALSE
1555	2014-2015	HS1255	MH8156	378.064902820026	FALSE	FALSE
1556	2014-2015	MH7796	MH8156	404.997963592211	FALSE	FALSE
1557	2014-2015	MH7492	MH8156	380.59975290013	FALSE	FALSE
1558	2014-2015	HS1340	MH8156	382.945408544247	FALSE	FALSE
1559	2014-2015	HS1413	MH8156	384.972143326424	FALSE	FALSE
1560	2014-2015	HS1448	MH8156	390.774230492434	FALSE	FALSE
1561	2014-2015	HS1393	MH8156	386.774230492434	FALSE	FALSE
1562	2014-2015	MH7890	MH8156	378.113062821372	FALSE	FALSE
1563	2014-2015	HS1345	MH8156	376.880596722877	FALSE	FALSE
1564	2014-2015	HS1369	MH8156	395.038947015117	FALSE	FALSE
1565	2014-2015	HS1336	MH8156	388.885715704634	FALSE	FALSE
1566	2014-2015	MH7612	MH8156	388.875281037123	FALSE	FALSE
1567	2014-2015	HS1377	MH8156	386.774230492434	FALSE	FALSE
1568	2014-2015	MH7845	MH8156	390.752099326302	FALSE	FALSE
1569	2014-2015	MH7891	MH8156	378.989068656742	FALSE	FALSE
1570	2014-2015	MH8126	MH8156	380.046506461044	FALSE	FALSE
1571	2014-2015	MH7409	MH8156	376.774230492434	FALSE	FALSE
1572	2014-2015	MH7893	MH8156	384.90653584074	FALSE	FALSE
1573	2014-2015	HS1388	MH8156	390.817146347089	FALSE	FALSE
1574	2014-2015	HS1342	MH8156	392.896213839574	FALSE	FALSE
1575	2014-2015	MH7455	MH8156	378.702914657098	FALSE	FALSE
1576	2014-2015	HS1408	MH8156	379.966094890667	FALSE	FALSE
1577	2014-2015	MH7885	MH8156	378.774230492434	FALSE	FALSE
1578	2014-2015	HS1409	MH8156	378.91106845758	FALSE	FALSE
1579	2014-2015	MH7440	MH8156	383.827164137774	FALSE	FALSE
1580	2014-2015	MH7390	MH8156	383.037870591145	FALSE	FALSE
1581	2014-2015	HS1256	MH8156	380.998654851884	FALSE	FALSE
1582	2014-2015	HS1328	MH8156	388.774230492434	FALSE	FALSE
1583	2014-2015	HS1327	MH8156	386.854225559237	FALSE	FALSE
1584	2014-2015	HS1313	MH8156	387.23623625763	FALSE	FALSE
1585	2014-2015	HS1250	MH8156	376.855837324634	FALSE	FALSE
1586	2014-2015	HS1294	MH8156	377.237326727592	FALSE	FALSE
1587	2014-2015	HS1253	MH8156	376.774230492434	FALSE	FALSE
1588	2014-2015	HS1385	MH8156	394.978230492434	FALSE	FALSE
1589	2014-2015	HS1357	MH8156	390.774230492434	FALSE	FALSE
1590	2014-2015	HS1349	MH8156	389.455253037115	FALSE	FALSE
1591	2014-2015	MH8041	MH8156	378.818518120846	FALSE	FALSE
1592	2014-2015	HS1427	MH8156	382.997602995147	FALSE	FALSE
1593	2014-2015	HS1375	MH8156	385.563758967967	FALSE	FALSE
1594	2014-2015	HS1341	MH8156	385.06069126663	FALSE	FALSE
1595	2014-2015	MH7800	MH8156	383.634763340765	FALSE	FALSE
1596	2014-2015	HS1392	MH8156	386.774230492434	FALSE	FALSE
1597	2014-2015	HS1402	MH8156	376.774230492434	FALSE	FALSE
1598	2014-2015	HS1401	MH8156	376.842932633011	FALSE	FALSE
1599	2014-2015	HS1351	MH8156	376.8266743082	FALSE	FALSE
1600	2014-2015	MH8088	MH8156	383.770906147192	FALSE	FALSE
1601	2014-2015	MH8089	MH8156	382.312519931275	FALSE	FALSE
1602	2014-2015	HS1421	MH8156	377.191476825158	FALSE	FALSE
1603	2014-2015	HS1364	MH8156	376.855688079667	FALSE	FALSE
1604	2014-2015	HS1405	MH8156	392.774230492434	FALSE	FALSE
1605	2014-2015	HS1425	MH8156	384.905165991541	FALSE	FALSE
1606	2014-2015	HS1387	MH8156	386.774230492434	FALSE	FALSE
1607	2014-2015	HS1367	MH8156	381.107668675111	FALSE	FALSE
1608	2014-2015	HS1390	MH8156	382.047767832963	FALSE	FALSE
1609	2014-2015	HS1391	MH8156	380.774230492434	FALSE	FALSE
1610	2014-2015	HS1563	HS1567	80.3786510240707	FALSE	FALSE
1611	2014-2015	HS1562	HS1567	80	FALSE	FALSE
1612	2014-2015	HS1564	HS1567	80.0991157116168	FALSE	FALSE
1613	2014-2015	HS1394	HS1567	88	FALSE	FALSE
1614	2014-2015	MH7843	HS1567	88.0542839003261	FALSE	FALSE
1615	2014-2015	MH8155	HS1567	28.00512542811	FALSE	FALSE
1616	2014-2015	HS1376	HS1567	32.1400280251248	FALSE	FALSE
1617	2014-2015	HS1484	HS1567	88	FALSE	FALSE
1618	2014-2015	MH8156	HS1567	382.774230492434	FALSE	FALSE
1619	2014-2015	MH7505	HS1567	22.6552234273007	FALSE	FALSE
1620	2014-2015	HS1255	HS1567	19.2906723275919	FALSE	FALSE
1621	2014-2015	MH7796	HS1567	92.223733099777	FALSE	FALSE
1622	2014-2015	MH8165	HS1567	84.3789091879843	FALSE	FALSE
1623	2014-2015	MH7492	HS1567	39.825522407696	FALSE	FALSE
1624	2014-2015	HS1340	HS1567	42.1711780518135	FALSE	FALSE
1625	2014-2015	HS1413	HS1567	76.1979128339898	FALSE	FALSE
1626	2014-2015	HS1448	HS1567	32	FALSE	FALSE
1627	2014-2015	HS1393	HS1567	74	FALSE	FALSE
1628	2014-2015	MH7890	HS1567	19.3388323289378	FALSE	FALSE
1629	2014-2015	HS1345	HS1567	18.1063662304436	FALSE	FALSE
1630	2014-2015	HS1369	HS1567	82.2647165226827	FALSE	FALSE
1631	2014-2015	HS1336	HS1567	76.2073384369506	FALSE	FALSE
1632	2014-2015	MH7612	HS1567	76.1010505446887	FALSE	FALSE
1633	2014-2015	HS1377	HS1567	88	FALSE	FALSE
1634	2014-2015	MH8589	HS1567	86.262809107772	FALSE	FALSE
1635	2014-2015	MH7845	HS1567	85.9778688338679	FALSE	FALSE
1636	2014-2015	MH7891	HS1567	20.2148381643079	FALSE	FALSE
1637	2014-2015	MH8126	HS1567	21.2722759686102	FALSE	FALSE
1638	2014-2015	MH7409	HS1567	18	FALSE	FALSE
1639	2014-2015	MH7893	HS1567	28.1323053483057	FALSE	FALSE
1640	2014-2015	HS1530	HS1567	86.4588515516551	FALSE	FALSE
1641	2014-2015	HS1388	HS1567	86.0429158546546	FALSE	FALSE
1642	2014-2015	HS1342	HS1567	88.1219833471404	FALSE	FALSE
1643	2014-2015	HS1543	HS1567	88.3645862152836	FALSE	FALSE
1644	2014-2015	HS1544	HS1567	86.2885336187546	FALSE	FALSE
1645	2014-2015	MH8439	HS1567	86.0485988395281	FALSE	FALSE
1646	2014-2015	MH7455	HS1567	20.0713158353361	FALSE	FALSE
1647	2014-2015	HS1408	HS1567	21.4283613516556	FALSE	FALSE
1648	2014-2015	MH7885	HS1567	20	FALSE	FALSE
1649	2014-2015	HS1409	HS1567	20.1368379651464	FALSE	FALSE
1650	2014-2015	MH7440	HS1567	25.0529336453396	FALSE	FALSE
1651	2014-2015	MH7390	HS1567	24.2636400987113	FALSE	FALSE
1652	2014-2015	HS1256	HS1567	22.2244243594501	FALSE	FALSE
1653	2014-2015	MH8386	HS1567	86.239891300635	FALSE	FALSE
1654	2014-2015	HS1507	HS1567	86.3247423748987	FALSE	FALSE
1655	2014-2015	HS1328	HS1567	76	FALSE	FALSE
1656	2014-2015	HS1327	HS1567	74.0799950668033	FALSE	FALSE
1657	2014-2015	HS1313	HS1567	74.462005765196	FALSE	FALSE
1658	2014-2015	HS1250	HS1567	21.9183931677997	FALSE	FALSE
1659	2014-2015	HS1294	HS1567	22.4630962351578	FALSE	FALSE
1660	2014-2015	HS1253	HS1567	22	FALSE	FALSE
1661	2014-2015	HS1532	HS1567	28	FALSE	FALSE
1662	2014-2015	HS1455	HS1567	90.0233082894973	FALSE	FALSE
1663	2014-2015	HS1385	HS1567	288	FALSE	FALSE
1664	2014-2015	HS1357	HS1567	86	FALSE	FALSE
1665	2014-2015	HS1525	HS1567	74	FALSE	FALSE
1666	2014-2015	HS1349	HS1567	286.477022544682	FALSE	FALSE
1667	2014-2015	HS1465	HS1567	78	FALSE	FALSE
1668	2014-2015	HS1463	HS1567	78	FALSE	FALSE
1669	2014-2015	MH8041	HS1567	78.0442876284125	FALSE	FALSE
1670	2014-2015	HS1460	HS1567	84	FALSE	FALSE
1671	2014-2015	HS1427	HS1567	84.2233725027136	FALSE	FALSE
1672	2014-2015	HS1375	HS1567	44.7895284755328	FALSE	FALSE
1673	2014-2015	HS1341	HS1567	44.4593596326286	FALSE	FALSE
1674	2014-2015	HS1517	HS1567	86.1375417095321	FALSE	FALSE
1675	2014-2015	HS1537	HS1567	18	FALSE	FALSE
1676	2014-2015	HS1509	HS1567	20	FALSE	FALSE
1677	2014-2015	MH8183	HS1567	81.8006535020163	FALSE	FALSE
1678	2014-2015	MH7800	HS1567	42.860532848331	FALSE	FALSE
1679	2014-2015	MH8129	HS1567	57.4256951555261	FALSE	FALSE
1680	2014-2015	HS1392	HS1567	74	FALSE	FALSE
1681	2014-2015	HS1402	HS1567	74	FALSE	FALSE
1682	2014-2015	HS1401	HS1567	74.0687021405768	FALSE	FALSE
1683	2014-2015	HS1351	HS1567	74.0524438157665	FALSE	FALSE
1684	2014-2015	HS1487	HS1567	26.0473871954906	FALSE	FALSE
1685	2014-2015	MH8088	HS1567	16.9966756547579	FALSE	FALSE
1686	2014-2015	MH8089	HS1567	15.5382894388413	FALSE	FALSE
1687	2014-2015	HS1421	HS1567	18.417246332724	FALSE	FALSE
1688	2014-2015	HS1473	HS1567	73.012346334488	FALSE	FALSE
1689	2014-2015	HS1474	HS1567	44.297164468781	FALSE	FALSE
1690	2014-2015	HS1518	HS1567	92.654245843706	FALSE	FALSE
1691	2014-2015	HS1519	HS1567	92.0492364221178	FALSE	FALSE
1692	2014-2015	HS1520	HS1567	92.1800959990915	FALSE	FALSE
1693	2014-2015	HS1505	HS1567	78.681429145104	FALSE	FALSE
1694	2014-2015	MH8392	HS1567	78	FALSE	FALSE
1695	2014-2015	HS1457	HS1567	78.285437025044	FALSE	FALSE
1696	2014-2015	MH8354	HS1567	78.2248428041304	FALSE	FALSE
1697	2014-2015	HS1510	HS1567	81.1751981208285	FALSE	FALSE
1698	2014-2015	HS1364	HS1567	36.0814575872335	FALSE	FALSE
1699	2014-2015	HS1405	HS1567	88	FALSE	FALSE
1700	2014-2015	HS1425	HS1567	80.1309354991071	FALSE	FALSE
1701	2014-2015	MH8393	HS1567	287.906939293383	FALSE	FALSE
1702	2014-2015	MH8309	HS1567	30	FALSE	FALSE
1703	2014-2015	HS1450	HS1567	27.9556113711946	FALSE	FALSE
1704	2014-2015	MH8137	HS1567	74.046216183155	FALSE	FALSE
1705	2014-2015	MH8447	HS1567	74.572484724583	FALSE	FALSE
1706	2014-2015	MH8052	HS1567	76.1190406133291	FALSE	FALSE
1707	2014-2015	MH8396	HS1567	74	FALSE	FALSE
1708	2014-2015	MH8090	HS1567	74.995682293303	FALSE	FALSE
1709	2014-2015	HS1445	HS1567	75.8751651254958	FALSE	FALSE
1710	2014-2015	HS1387	HS1567	74	FALSE	FALSE
1711	2014-2015	HS1367	HS1567	22.333438182677	FALSE	FALSE
1712	2014-2015	HS1390	HS1567	79.2735373405292	FALSE	FALSE
1713	2014-2015	HS1391	HS1567	78	FALSE	FALSE
1714	2014-2015	HS1563	MH8700	80.4281441234878	FALSE	FALSE
1715	2014-2015	HS1562	MH8700	80.0494930994171	FALSE	FALSE
1716	2014-2015	HS1564	MH8700	80.1486088110339	FALSE	FALSE
1717	2014-2015	HS1394	MH8700	88.0494930994171	FALSE	FALSE
1718	2014-2015	MH7843	MH8700	88.1037769997432	FALSE	FALSE
1719	2014-2015	MH8155	MH8700	28.0546185275271	FALSE	FALSE
1720	2014-2015	HS1376	MH8700	32.1895211245419	FALSE	FALSE
1721	2014-2015	HS1484	MH8700	88.0494930994171	FALSE	FALSE
1722	2014-2015	MH8156	MH8700	382.823723591851	FALSE	FALSE
1723	2014-2015	MH7505	MH8700	22.7047165267178	FALSE	FALSE
1724	2014-2015	HS1255	MH8700	19.340165427009	FALSE	FALSE
1725	2014-2015	MH7796	MH8700	92.2732261991941	FALSE	FALSE
1726	2014-2015	MH8165	MH8700	84.4284022874014	FALSE	FALSE
1727	2014-2015	MH7492	MH8700	39.8750155071131	FALSE	FALSE
1728	2014-2015	HS1340	MH8700	42.2206711512306	FALSE	FALSE
1729	2014-2015	HS1413	MH8700	76.2474059334069	FALSE	FALSE
1730	2014-2015	HS1448	MH8700	32.0494930994171	FALSE	FALSE
1731	2014-2015	HS1393	MH8700	74.0494930994171	FALSE	FALSE
1732	2014-2015	MH8586	MH8700	79.7139588857311	FALSE	FALSE
1733	2014-2015	MH7890	MH8700	19.3883254283549	FALSE	FALSE
1734	2014-2015	HS1345	MH8700	18.1558593298607	FALSE	FALSE
1735	2014-2015	HS1369	MH8700	82.3142096220998	FALSE	FALSE
1736	2014-2015	HS1336	MH8700	76.2568315363677	FALSE	FALSE
1737	2014-2015	MH7612	MH8700	76.1505436441058	FALSE	FALSE
1738	2014-2015	HS1377	MH8700	88.0494930994171	FALSE	FALSE
1739	2014-2015	MH8589	MH8700	86.3123022071891	FALSE	FALSE
1740	2014-2015	MH7845	MH8700	86.027361933285	FALSE	FALSE
1741	2014-2015	MH7891	MH8700	20.264331263725	FALSE	FALSE
1742	2014-2015	MH8126	MH8700	21.3217690680273	FALSE	FALSE
1743	2014-2015	MH7409	MH8700	18.0494930994171	FALSE	FALSE
1744	2014-2015	MH7893	MH8700	28.1817984477228	FALSE	FALSE
1745	2014-2015	HS1530	MH8700	86.5083446510722	FALSE	FALSE
1746	2014-2015	HS1388	MH8700	86.0924089540717	FALSE	FALSE
1747	2014-2015	HS1342	MH8700	88.1714764465575	FALSE	FALSE
1748	2014-2015	HS1543	MH8700	88.4140793147007	FALSE	FALSE
1749	2014-2015	HS1544	MH8700	86.3380267181717	FALSE	FALSE
1750	2014-2015	MH8439	MH8700	86.0980919389452	FALSE	FALSE
1751	2014-2015	MH7455	MH8700	20.1208089347532	FALSE	FALSE
1752	2014-2015	HS1408	MH8700	21.4778544510727	FALSE	FALSE
1753	2014-2015	MH7885	MH8700	20.0494930994171	FALSE	FALSE
1754	2014-2015	HS1409	MH8700	20.1863310645635	FALSE	FALSE
1755	2014-2015	MH7440	MH8700	25.1024267447567	FALSE	FALSE
1756	2014-2015	MH7390	MH8700	24.3131331981284	FALSE	FALSE
1757	2014-2015	HS1256	MH8700	22.2739174588672	FALSE	FALSE
1758	2014-2015	MH8386	MH8700	86.2893844000521	FALSE	FALSE
1759	2014-2015	HS1507	MH8700	86.3742354743158	FALSE	FALSE
1760	2014-2015	HS1328	MH8700	76.0494930994171	FALSE	FALSE
1761	2014-2015	HS1327	MH8700	74.1294881662204	FALSE	FALSE
1762	2014-2015	HS1313	MH8700	74.5114988646131	FALSE	FALSE
1763	2014-2015	HS1250	MH8700	21.9678862672168	FALSE	FALSE
1764	2014-2015	HS1294	MH8700	22.5125893345749	FALSE	FALSE
1765	2014-2015	HS1253	MH8700	22.0494930994171	FALSE	FALSE
1766	2014-2015	HS1532	MH8700	28.0494930994171	FALSE	FALSE
1767	2014-2015	HS1455	MH8700	90.0728013889144	FALSE	FALSE
1768	2014-2015	HS1385	MH8700	288.049493099417	FALSE	FALSE
1769	2014-2015	HS1357	MH8700	86.0494930994171	FALSE	FALSE
1770	2014-2015	HS1525	MH8700	74.0494930994171	FALSE	FALSE
1771	2014-2015	HS1349	MH8700	286.526515644099	FALSE	FALSE
1772	2014-2015	HS1465	MH8700	78.0494930994171	FALSE	FALSE
1773	2014-2015	HS1463	MH8700	78.0494930994171	FALSE	FALSE
1774	2014-2015	MH8041	MH8700	78.0937807278296	FALSE	FALSE
1775	2014-2015	HS1460	MH8700	84.0494930994171	FALSE	FALSE
1776	2014-2015	HS1427	MH8700	84.2728656021307	FALSE	FALSE
1777	2014-2015	HS1375	MH8700	44.8390215749499	FALSE	FALSE
1778	2014-2015	HS1341	MH8700	44.5088527320457	FALSE	FALSE
1779	2014-2015	HS1517	MH8700	86.1870348089492	FALSE	FALSE
1780	2014-2015	HS1537	MH8700	18.0494930994171	FALSE	FALSE
1781	2014-2015	HS1509	MH8700	20.0494930994171	FALSE	FALSE
1782	2014-2015	MH8183	MH8700	81.8501466014334	FALSE	FALSE
1783	2014-2015	MH7800	MH8700	42.9100259477481	FALSE	FALSE
1784	2014-2015	MH8129	MH8700	57.4751882549432	FALSE	FALSE
1785	2014-2015	HS1392	MH8700	74.0494930994171	FALSE	FALSE
1786	2014-2015	HS1402	MH8700	74.0494930994171	FALSE	FALSE
1787	2014-2015	HS1401	MH8700	74.1181952399939	FALSE	FALSE
1788	2014-2015	HS1351	MH8700	74.1019369151836	FALSE	FALSE
1789	2014-2015	HS1487	MH8700	26.0968802949077	FALSE	FALSE
1790	2014-2015	MH8088	MH8700	17.046168754175	FALSE	FALSE
1791	2014-2015	MH8089	MH8700	15.5877825382584	FALSE	FALSE
1792	2014-2015	HS1421	MH8700	18.4667394321411	FALSE	FALSE
1793	2014-2015	HS1473	MH8700	73.0618394339051	FALSE	FALSE
1794	2014-2015	HS1474	MH8700	44.3466575681981	FALSE	FALSE
1795	2014-2015	HS1518	MH8700	92.7037389431231	FALSE	FALSE
1796	2014-2015	HS1519	MH8700	92.0987295215349	FALSE	FALSE
1797	2014-2015	HS1520	MH8700	92.2295890985086	FALSE	FALSE
1798	2014-2015	HS1505	MH8700	78.7309222445211	FALSE	FALSE
1799	2014-2015	MH8392	MH8700	78.0494930994171	FALSE	FALSE
1800	2014-2015	HS1457	MH8700	78.3349301244611	FALSE	FALSE
1801	2014-2015	MH8354	MH8700	78.2743359035475	FALSE	FALSE
1802	2014-2015	HS1510	MH8700	81.2246912202456	FALSE	FALSE
1803	2014-2015	HS1364	MH8700	36.1309506866506	FALSE	FALSE
1804	2014-2015	HS1405	MH8700	88.0494930994171	FALSE	FALSE
1805	2014-2015	HS1425	MH8700	80.1804285985242	FALSE	FALSE
1806	2014-2015	HS1535	MH8700	30.5402794262557	FALSE	FALSE
1807	2014-2015	MH8393	MH8700	287.9564323928	FALSE	FALSE
1808	2014-2015	MH8309	MH8700	30.0494930994171	FALSE	FALSE
1809	2014-2015	HS1450	MH8700	28.0051044706117	FALSE	FALSE
1810	2014-2015	MH8137	MH8700	74.0957092825721	FALSE	FALSE
1811	2014-2015	MH8447	MH8700	74.6219778240001	FALSE	FALSE
1812	2014-2015	MH8052	MH8700	76.1685337127462	FALSE	FALSE
1813	2014-2015	MH8396	MH8700	74.0494930994171	FALSE	FALSE
1814	2014-2015	MH8090	MH8700	75.0451753927201	FALSE	FALSE
1815	2014-2015	HS1445	MH8700	75.9246582249129	FALSE	FALSE
1816	2014-2015	HS1387	MH8700	74.0494930994171	FALSE	FALSE
1817	2014-2015	HS1367	MH8700	22.3829312820941	FALSE	FALSE
1818	2014-2015	HS1390	MH8700	79.3230304399463	FALSE	FALSE
1819	2014-2015	HS1391	MH8700	78.0494930994171	FALSE	FALSE
1820	2014-2015	MH7492	MH7505	34.4807458349967	FALSE	FALSE
1821	2014-2015	MH7409	MH7505	4.6552234273007	FALSE	FALSE
1822	2014-2015	MH7455	MH7505	14.7265392626368	FALSE	FALSE
1823	2014-2015	MH7440	MH7505	19.7081570726403	FALSE	FALSE
1824	2014-2015	MH7390	MH7505	18.918863526012	FALSE	FALSE
1825	2014-2015	HS1256	MH7505	16.8796477867508	FALSE	FALSE
1826	2014-2015	HS1250	MH7505	16.5736165951004	FALSE	FALSE
1827	2014-2015	HS1294	MH7505	17.1183196624585	FALSE	FALSE
1828	2014-2015	HS1253	MH7505	16.6552234273007	FALSE	FALSE
1829	2014-2015	HS1250	HS1255	13.2090654953916	FALSE	FALSE
1830	2014-2015	HS1376	MH7796	100.363761124902	FALSE	FALSE
1831	2014-2015	MH7492	MH7796	92.049255507473	FALSE	FALSE
1832	2014-2015	HS1340	MH7796	94.3949111515905	FALSE	FALSE
1833	2014-2015	HS1413	MH7796	32.4216459337668	FALSE	FALSE
1834	2014-2015	MH7890	MH7796	86.9165650614948	FALSE	FALSE
1835	2014-2015	HS1345	MH7796	86.3300993302206	FALSE	FALSE
1836	2014-2015	HS1369	MH7796	38.4884496224597	FALSE	FALSE
1837	2014-2015	HS1336	MH7796	32.4310715367276	FALSE	FALSE
1838	2014-2015	MH7612	MH7796	32.3247836444657	FALSE	FALSE
1839	2014-2015	HS1377	MH7796	104.223733099777	FALSE	FALSE
1840	2014-2015	MH7409	MH7796	86.223733099777	FALSE	FALSE
1841	2014-2015	HS1342	MH7796	104.345716446917	FALSE	FALSE
1842	2014-2015	MH7455	MH7796	88.2950489351131	FALSE	FALSE
1843	2014-2015	MH7440	MH7796	93.2766667451166	FALSE	FALSE
1844	2014-2015	MH7390	MH7796	92.4873731984883	FALSE	FALSE
1845	2014-2015	HS1256	MH7796	90.4481574592271	FALSE	FALSE
1846	2014-2015	HS1328	MH7796	32.223733099777	FALSE	FALSE
1847	2014-2015	HS1327	MH7796	30.3037281665803	FALSE	FALSE
1848	2014-2015	HS1313	MH7796	30.685738864973	FALSE	FALSE
1849	2014-2015	HS1250	MH7796	90.1421262675767	FALSE	FALSE
1850	2014-2015	HS1294	MH7796	90.6868293349348	FALSE	FALSE
1851	2014-2015	HS1253	MH7796	90.223733099777	FALSE	FALSE
1852	2014-2015	HS1385	MH7796	304.223733099777	FALSE	FALSE
1853	2014-2015	HS1357	MH7796	102.223733099777	FALSE	FALSE
1854	2014-2015	HS1349	MH7796	302.700755644459	FALSE	FALSE
1855	2014-2015	HS1375	MH7796	97.0132615753098	FALSE	FALSE
1856	2014-2015	HS1341	MH7796	96.6830927324056	FALSE	FALSE
1857	2014-2015	MH7800	MH7796	95.084265948108	FALSE	FALSE
1858	2014-2015	HS1392	MH7796	30.223733099777	FALSE	FALSE
1859	2014-2015	HS1402	MH7796	90.223733099777	FALSE	FALSE
1860	2014-2015	HS1351	MH7796	90.2761769155435	FALSE	FALSE
1861	2014-2015	HS1364	MH7796	88.3051906870105	FALSE	FALSE
1862	2014-2015	HS1387	MH7796	30.223733099777	FALSE	FALSE
1863	2014-2015	HS1367	MH7796	90.557171282454	FALSE	FALSE
1864	2014-2015	HS1394	MH8165	96.3789091879843	FALSE	FALSE
1865	2014-2015	MH7843	MH8165	96.4331930883104	FALSE	FALSE
1866	2014-2015	HS1376	MH8165	92.5189372131091	FALSE	FALSE
1867	2014-2015	MH8156	MH8165	393.153139680418	FALSE	FALSE
1868	2014-2015	MH7505	MH8165	83.034132615285	FALSE	FALSE
1869	2014-2015	HS1255	MH8165	79.6695815155762	FALSE	FALSE
1870	2014-2015	MH7796	MH8165	40.6026422877613	FALSE	FALSE
1871	2014-2015	MH7492	MH8165	84.2044315956803	FALSE	FALSE
1872	2014-2015	HS1340	MH8165	86.5500872397978	FALSE	FALSE
1873	2014-2015	HS1413	MH8165	12.5768220219741	FALSE	FALSE
1874	2014-2015	HS1448	MH8165	92.3789091879843	FALSE	FALSE
1875	2014-2015	HS1393	MH8165	22.3789091879843	FALSE	FALSE
1876	2014-2015	MH7890	MH8165	79.7177415169221	FALSE	FALSE
1877	2014-2015	HS1345	MH8165	78.4852754184279	FALSE	FALSE
1878	2014-2015	HS1369	MH8165	30.643625710667	FALSE	FALSE
1879	2014-2015	HS1336	MH8165	24.5862476249349	FALSE	FALSE
1880	2014-2015	MH7612	MH8165	24.479959732673	FALSE	FALSE
1881	2014-2015	HS1377	MH8165	96.3789091879843	FALSE	FALSE
1882	2014-2015	MH7845	MH8165	94.3567780218522	FALSE	FALSE
1883	2014-2015	MH7891	MH8165	80.5937473522922	FALSE	FALSE
1884	2014-2015	MH8126	MH8165	81.6511851565945	FALSE	FALSE
1885	2014-2015	MH7409	MH8165	78.3789091879843	FALSE	FALSE
1886	2014-2015	MH7893	MH8165	88.51121453629	FALSE	FALSE
1887	2014-2015	HS1388	MH8165	94.4218250426389	FALSE	FALSE
1888	2014-2015	HS1342	MH8165	96.5008925351247	FALSE	FALSE
1889	2014-2015	MH7455	MH8165	80.4502250233204	FALSE	FALSE
1890	2014-2015	HS1408	MH8165	81.8072705396399	FALSE	FALSE
1891	2014-2015	MH7885	MH8165	80.3789091879843	FALSE	FALSE
1892	2014-2015	HS1409	MH8165	80.5157471531307	FALSE	FALSE
1893	2014-2015	MH7440	MH8165	85.4318428333239	FALSE	FALSE
1894	2014-2015	MH7390	MH8165	84.6425492866956	FALSE	FALSE
1895	2014-2015	HS1256	MH8165	82.6033335474344	FALSE	FALSE
1896	2014-2015	HS1328	MH8165	24.3789091879843	FALSE	FALSE
1897	2014-2015	HS1327	MH8165	22.4589042547876	FALSE	FALSE
1898	2014-2015	HS1313	MH8165	22.8409149531803	FALSE	FALSE
1899	2014-2015	HS1250	MH8165	82.297302355784	FALSE	FALSE
1900	2014-2015	HS1294	MH8165	82.8420054231421	FALSE	FALSE
1901	2014-2015	HS1253	MH8165	82.3789091879843	FALSE	FALSE
1902	2014-2015	HS1455	MH8165	94.4022174774816	FALSE	FALSE
1903	2014-2015	HS1385	MH8165	296.378909187984	FALSE	FALSE
1904	2014-2015	HS1357	MH8165	94.3789091879843	FALSE	FALSE
1905	2014-2015	HS1349	MH8165	294.855931732666	FALSE	FALSE
1906	2014-2015	MH8041	MH8165	74.4231968163968	FALSE	FALSE
1907	2014-2015	HS1427	MH8165	88.6022816906979	FALSE	FALSE
1908	2014-2015	HS1375	MH8165	89.1684376635171	FALSE	FALSE
1909	2014-2015	HS1341	MH8165	88.8382688206129	FALSE	FALSE
1910	2014-2015	MH7800	MH8165	87.2394420363153	FALSE	FALSE
1911	2014-2015	HS1392	MH8165	22.3789091879843	FALSE	FALSE
1912	2014-2015	HS1402	MH8165	82.3789091879843	FALSE	FALSE
1913	2014-2015	HS1401	MH8165	82.4476113285611	FALSE	FALSE
1914	2014-2015	HS1351	MH8165	82.4313530037508	FALSE	FALSE
1915	2014-2015	MH8088	MH8165	81.3755848427422	FALSE	FALSE
1916	2014-2015	MH8089	MH8165	79.9171986268256	FALSE	FALSE
1917	2014-2015	HS1421	MH8165	78.7961555207083	FALSE	FALSE
1918	2014-2015	HS1457	MH8165	26.6643462130283	FALSE	FALSE
1919	2014-2015	HS1364	MH8165	80.4603667752178	FALSE	FALSE
1920	2014-2015	HS1405	MH8165	96.3789091879843	FALSE	FALSE
1921	2014-2015	HS1425	MH8165	88.5098446870914	FALSE	FALSE
1922	2014-2015	HS1450	MH8165	88.3345205591789	FALSE	FALSE
1923	2014-2015	MH8052	MH8165	24.4979498013134	FALSE	FALSE
1924	2014-2015	MH8090	MH8165	15.3745914812873	FALSE	FALSE
1925	2014-2015	HS1387	MH8165	22.3789091879843	FALSE	FALSE
1926	2014-2015	HS1367	MH8165	82.7123473706613	FALSE	FALSE
1927	2014-2015	HS1390	MH8165	87.6524465285135	FALSE	FALSE
1928	2014-2015	HS1391	MH8165	86.3789091879843	FALSE	FALSE
1929	2014-2015	HS1255	MH7492	31.1161947352879	FALSE	FALSE
1930	2014-2015	MH7409	MH7492	29.825522407696	FALSE	FALSE
1931	2014-2015	MH7455	MH7492	31.8968382430321	FALSE	FALSE
1932	2014-2015	MH7440	MH7492	36.8784560530356	FALSE	FALSE
1933	2014-2015	MH7390	MH7492	36.0891625064073	FALSE	FALSE
1934	2014-2015	HS1256	MH7492	34.0499467671461	FALSE	FALSE
1935	2014-2015	HS1250	MH7492	33.7439155754957	FALSE	FALSE
1936	2014-2015	HS1294	MH7492	34.2886186428538	FALSE	FALSE
1937	2014-2015	HS1253	MH7492	33.825522407696	FALSE	FALSE
1938	2014-2015	MH7505	HS1340	36.8264014791142	FALSE	FALSE
1939	2014-2015	HS1255	HS1340	33.4618503794054	FALSE	FALSE
1940	2014-2015	HS1345	HS1340	32.2775442822571	FALSE	FALSE
1941	2014-2015	HS1336	HS1340	78.3785164887641	FALSE	FALSE
1942	2014-2015	MH7612	HS1340	78.2722285965022	FALSE	FALSE
1943	2014-2015	MH7409	HS1340	32.1711780518135	FALSE	FALSE
1944	2014-2015	HS1342	HS1340	82.2931613989539	FALSE	FALSE
1945	2014-2015	MH7455	HS1340	34.2424938871496	FALSE	FALSE
1946	2014-2015	MH7440	HS1340	39.2241116971531	FALSE	FALSE
1947	2014-2015	MH7390	HS1340	38.4348181505248	FALSE	FALSE
1948	2014-2015	HS1256	HS1340	36.3956024112636	FALSE	FALSE
1949	2014-2015	HS1328	HS1340	78.1711780518135	FALSE	FALSE
1950	2014-2015	HS1327	HS1340	76.2511731186168	FALSE	FALSE
1951	2014-2015	HS1313	HS1340	76.6331838170095	FALSE	FALSE
1952	2014-2015	HS1250	HS1340	36.0895712196132	FALSE	FALSE
1953	2014-2015	HS1294	HS1340	36.6342742869713	FALSE	FALSE
1954	2014-2015	HS1253	HS1340	36.1711780518135	FALSE	FALSE
1955	2014-2015	HS1357	HS1340	80.1711780518135	FALSE	FALSE
1956	2014-2015	HS1349	HS1340	280.648200596495	FALSE	FALSE
1957	2014-2015	HS1367	HS1340	36.5046162344905	FALSE	FALSE
1958	2014-2015	HS1376	HS1413	84.3379408591146	FALSE	FALSE
1959	2014-2015	MH7505	HS1413	74.8531362612905	FALSE	FALSE
1960	2014-2015	HS1255	HS1413	71.4885851615817	FALSE	FALSE
1961	2014-2015	MH7492	HS1413	76.0234352416858	FALSE	FALSE
1962	2014-2015	HS1340	HS1413	78.3690908858033	FALSE	FALSE
1963	2014-2015	HS1345	HS1413	70.3042790644334	FALSE	FALSE
1964	2014-2015	HS1369	HS1413	22.4626293566725	FALSE	FALSE
1965	2014-2015	HS1336	HS1413	16.4052512709404	FALSE	FALSE
1966	2014-2015	MH7612	HS1413	16.2989633786785	FALSE	FALSE
1967	2014-2015	HS1377	HS1413	88.1979128339898	FALSE	FALSE
1968	2014-2015	MH7409	HS1413	70.1979128339898	FALSE	FALSE
1969	2014-2015	HS1342	HS1413	88.3198961811302	FALSE	FALSE
1970	2014-2015	MH7455	HS1413	72.2692286693259	FALSE	FALSE
1971	2014-2015	MH7440	HS1413	77.2508464793294	FALSE	FALSE
1972	2014-2015	MH7390	HS1413	76.4615529327011	FALSE	FALSE
1973	2014-2015	HS1256	HS1413	74.4223371934399	FALSE	FALSE
1974	2014-2015	HS1328	HS1413	16.1979128339898	FALSE	FALSE
1975	2014-2015	HS1327	HS1413	14.2779079007931	FALSE	FALSE
1976	2014-2015	HS1313	HS1413	14.6599185991858	FALSE	FALSE
1977	2014-2015	HS1250	HS1413	74.1163060017895	FALSE	FALSE
1978	2014-2015	HS1294	HS1413	74.6610090691476	FALSE	FALSE
1979	2014-2015	HS1253	HS1413	74.1979128339898	FALSE	FALSE
1980	2014-2015	HS1357	HS1413	86.1979128339898	FALSE	FALSE
1981	2014-2015	HS1349	HS1413	286.674935378671	FALSE	FALSE
1982	2014-2015	HS1375	HS1413	80.9874413095226	FALSE	FALSE
1983	2014-2015	HS1341	HS1413	80.6572724666184	FALSE	FALSE
1984	2014-2015	HS1402	HS1413	74.1979128339898	FALSE	FALSE
1985	2014-2015	HS1351	HS1413	74.2503566497563	FALSE	FALSE
1986	2014-2015	HS1364	HS1413	72.2793704212233	FALSE	FALSE
1987	2014-2015	HS1387	HS1413	14.1979128339898	FALSE	FALSE
1988	2014-2015	HS1367	HS1413	74.5313510166668	FALSE	FALSE
1989	2014-2015	HS1394	HS1448	92	FALSE	FALSE
1990	2014-2015	MH7843	HS1448	92.0542839003261	FALSE	FALSE
1991	2014-2015	HS1376	HS1448	36.1400280251248	FALSE	FALSE
1992	2014-2015	MH7505	HS1448	26.6552234273007	FALSE	FALSE
1993	2014-2015	HS1255	HS1448	23.2906723275919	FALSE	FALSE
1994	2014-2015	MH7796	HS1448	100.223733099777	FALSE	FALSE
1995	2014-2015	MH7492	HS1448	43.825522407696	FALSE	FALSE
1996	2014-2015	HS1340	HS1448	46.1711780518135	FALSE	FALSE
1997	2014-2015	HS1413	HS1448	84.1979128339898	TRUE	TRUE
1998	2014-2015	HS1393	HS1448	82	FALSE	FALSE
1999	2014-2015	MH7890	HS1448	23.3388323289378	FALSE	FALSE
[truncated: 5,767 more rows]
