# Supplementary material for: Stochastic processes constrain the within and between host evolution of influenza virus
Source: eLife journal article supplement (doi:10.7554/elife.35962), 2018-04-23
Supplement: supp [file elife-35962-supp-v1.zip › elife_poa_e35962_Figure_3_source_data_2.csv]

	HOUSE_ID	ENROLLID1	ENROLLID2	onset1	onset2	quality_distance	double
1	1068	300294	300293	2011-03-07	2011-03-08	TRUE	FALSE
4	1077	300331	300330	2011-02-20	2011-02-22	TRUE	FALSE
5	1077	300331	300332	2011-02-20	2011-02-22	TRUE	FALSE
22	1234	301023	301024	2011-02-28	2011-03-01	TRUE	FALSE
43	2162	321372	320645	2012-03-08	2012-03-11	TRUE	FALSE
51	3034	330136	330133	2013-01-19	2013-01-24	TRUE	FALSE
55	3111	330441	331061	2013-01-02	2013-01-02	TRUE	TRUE
71	5001	50001	50003	2014-12-25	2014-12-25	TRUE	TRUE
72	5001	50001	50004	2014-12-25	2014-12-25	TRUE	TRUE
74	5001	50003	50004	2014-12-25	2014-12-25	TRUE	TRUE
76	5002	50006	50007	2014-12-07	2014-12-07	TRUE	TRUE
83	5053	50230	50232	2014-12-05	2014-12-12	FALSE	FALSE
85	5070	50307	50305	2014-11-29	2014-12-05	TRUE	FALSE
87	5073	50318	50319	2014-11-23	2014-11-25	TRUE	FALSE
88	5073	50319	50316	2014-11-25	2014-11-30	TRUE	FALSE
89	5078	50330	50331	2014-12-06	2014-12-09	FALSE	FALSE
91	5078	50331	50332	2014-12-09	2014-12-11	TRUE	FALSE
94	5098	50419	50418	2014-12-22	2014-12-27	FALSE	FALSE
96	5109	50468	50466	2014-12-21	2014-12-24	TRUE	FALSE
97	5109	50468	50467	2014-12-21	2014-12-24	TRUE	FALSE
100	5126	50539	50540	2014-12-06	2014-12-06	TRUE	TRUE
102	5129	50552	50551	2014-11-17	2014-11-18	TRUE	FALSE
104	5129	50553	50552	2014-11-16	2014-11-17	TRUE	FALSE
105	5130	50556	50558	2014-12-18	2014-12-20	TRUE	FALSE
106	5143	50618	50619	2014-11-24	2014-11-25	TRUE	FALSE
107	5143	50620	50618	2014-11-22	2014-11-24	TRUE	FALSE
109	5147	50628	50632	2014-11-10	2014-11-13	TRUE	FALSE
112	5147	50632	50630	2014-11-13	2014-11-18	TRUE	FALSE
116	5185	50785	50784	2014-12-14	2014-12-15	TRUE	FALSE
119	5185	50786	50785	2014-12-11	2014-12-14	TRUE	FALSE
121	5191	50812	50809	2014-12-10	2014-12-14	TRUE	FALSE
122	5195	50832	50830	2014-11-30	2014-12-04	TRUE	FALSE
123	5200	50851	50850	2014-12-20	2014-12-24	TRUE	FALSE
129	5228	50967	50968	2014-12-04	2014-12-06	TRUE	FALSE
130	5228	50969	50967	2014-12-01	2014-12-04	TRUE	FALSE
134	5234	50993	50992	2015-01-04	2015-01-05	TRUE	FALSE
135	5244	51041	51043	2014-12-11	2014-12-12	TRUE	FALSE
136	5249	51054	51055	2014-12-15	2014-12-15	FALSE	TRUE
138	5250	51058	51057	2014-12-20	2014-12-22	TRUE	FALSE
139	5250	51058	51059	2014-12-20	2014-12-22	TRUE	FALSE
140	5254	51074	51073	2014-12-17	2014-12-20	TRUE	FALSE
147	5263	51105	51106	2014-12-01	2014-12-06	FALSE	FALSE
148	5270	51138	51137	2014-12-26	2014-12-27	TRUE	FALSE
150	5289	51220	51216	2014-12-13	2014-12-17	TRUE	FALSE
152	5317	51335	51336	2014-12-13	2014-12-15	TRUE	FALSE
153	5341	51439	51438	2014-12-06	2014-12-07	TRUE	FALSE
156	4024	UM40093	UM41510	2014-01-01	2014-01-03	TRUE	FALSE
164	4113	UM40449	UM41554	2013-11-19	2013-11-26	TRUE	FALSE
165	4115	UM40460	UM40457	2013-12-27	2013-12-29	TRUE	FALSE
176	4024	UM41510	UM40095	2014-01-03	2014-01-04	TRUE	FALSE
179	4113	UM41554	UM41553	2013-11-26	2013-11-28	TRUE	FALSE
182	4141	UM41570	UM41569	2013-11-11	2013-11-12	TRUE	FALSE
