# Supplementary material for: Stochastic processes constrain the within and between host evolution of influenza virus
Source: eLife journal article supplement (doi:10.7554/elife.35962), 2018-04-23
Supplement: supp [file elife-35962-supp-v1.zip › elife_poa_e35962_Figure_3_source_data_3.csv]

	SPECID1	SPECID2	freq1	freq2
1	M54586	M54585	0	0.900863885377
2	M54586	M54585	1	0.0970290771176
3	M54586	M54585	0.643225219764	1
4	M54586	M54585	0.354978951595	0
5	M54586	M54585	0.146442011944	0
6	M54586	M54585	0.852133255406	1
7	M54586	M54585	1	0.958955820724
8	M54586	M54585	0	0.0396898992129
9	M54586	M54585	0	0.0245977092282
10	M54586	M54585	1	0.974399396826
11	M54586	M54585	0.0982668055415	0
12	M54586	M54585	0.900528978841	1
13	M54206	M54205	0.2542518546	0
14	M54206	M54205	0.744905154785	1
15	M54206	M54205	0	0.0371293296785
16	M54206	M54205	1	0.962372290057
17	M54206	M54205	0	0.0265969538531
18	M54206	M54205	1	0.973062059559
19	M54206	M54205	1	0.976547364128
20	M54206	M54205	0	0.02284082798
21	M54206	M54205	0	0.0242333861497
22	M54206	M54205	1	0.97576661385
23	M54206	M54205	1	0.97600619195
24	M54206	M54205	0	0.0236498108015
25	M54206	M54205	0	0.0274128142741
26	M54206	M54205	1	0.971451743715
27	M54206	M54205	0	0.0257560078188
28	M54206	M54205	1	0.974129010003
29	M54206	M54205	0	0.020663744521
30	M54206	M54205	1	0.978799534842
31	M54206	M54205	0.38327738606	0.0208223762568
32	M54206	M54205	0.616380608251	0.978525345622
33	M54206	M54207	0.2542518546	0
34	M54206	M54207	0.744905154785	1
35	M54206	M54207	1	0.802738669238
36	M54206	M54207	0	0.196222925177
37	M54206	M54207	1	0.858483086681
38	M54206	M54207	0	0.139806981813
39	M54206	M54207	0.38327738606	0.823475258918
40	M54206	M54207	0.616380608251	0.176179516686
41	M54375	M54374	0.19627190774	0
42	M54375	M54374	0.803436078828	1
43	MH1205	MH1346	1	0.973123652238
44	MH1205	MH1346	0	0.0263243796573
45	MH1205	MH1346	0	0.269357311637
46	MH1205	MH1346	1	0.730308581091
47	MH1205	MH1346	1	0.862021120789
48	MH1205	MH1346	0	0.1374755843
49	MH1205	MH1346	0.976673427992	0
50	MH1205	MH1346	0.0228194726166	1
51	MH1205	MH1346	1	0
52	MH1205	MH1346	0	1
53	MH1205	MH1346	1	0
54	MH1205	MH1346	0	1
55	MH1205	MH1346	1	0.868784651941
56	MH1205	MH1346	0	0.130753164782
57	MH1205	MH1346	0	0.0451717869948
58	MH1205	MH1346	1	0.954507253261
59	MH3061	MH3270	1	0.244005981958
60	MH3061	MH3270	0	0.755270394134
61	MH2706	MH2737	0.244784202836	0
62	MH2706	MH2737	0.753263467549	1
63	MH2706	MH2737	1	0.969566608597
64	MH2706	MH2737	0	0.030090113646
65	MH2706	MH2737	0	0.0435569743186
66	MH2706	MH2737	1	0.9555257099
67	MH2706	MH2737	0	0.0204055618074
68	MH2706	MH2737	1	0.978886168911
69	MH2706	MH2737	1	0.949770190414
70	MH2706	MH2737	0	0.0498535396754
71	MH2706	MH2737	0	0.0617749564066
72	MH2706	MH2737	1	0.937721382774
73	MH2706	MH2737	0.0221180140336	0
74	MH2706	MH2737	0.977250944354	1
75	MH2706	MH2737	0.190678829115	0
76	MH2706	MH2737	0.807900130427	1
77	MH2706	MH2737	0.716619134042	0
78	MH2706	MH2737	0.28281320686	1
79	MH5712	MH5709	0.0242193827197	0
80	MH5712	MH5709	0.975386565971	1
81	MH5712	MH5709	1	0
82	MH5712	MH5709	0	1
83	MH5712	MH5709	0.0280651375576	0
84	MH5712	MH5709	0.970726813995	1
85	MH5712	MH5709	0	0.0318366404581
86	MH5712	MH5709	1	0.966362999299
87	MH5712	MH5709	0.969814849448	1
88	MH5712	MH5709	0.0295447927408	0
89	MH5712	MH5709	0.0254233348291	0
90	MH5712	MH5709	0.974180214085	1
91	MH5712	MH5709	0	0.038668870637
92	MH5712	MH5709	1	0.960554951034
93	MH5712	MH5709	0	0.131114783888
94	MH5712	MH5709	1	0.868299901348
95	MH5712	MH5709	0	0.0220598891279
96	MH5712	MH5709	1	0.977263804119
97	MH5712	MH5709	0.929840606219	1
98	MH5712	MH5709	0.0692716158236	0
99	MH5712	MH5709	0.945211352139	1
100	MH5712	MH5709	0.0531150684198	0
101	MH5712	MH5709	0.118328348245	0
102	MH5712	MH5709	0.880418410042	1
103	MH5712	MH5709	0	0.0379162603346
104	MH5712	MH5709	1	0.954431599229
105	MH5680	MH5712	0	0.0242193827197
106	MH5680	MH5712	1	0.975386565971
107	MH5680	MH5712	0	1
108	MH5680	MH5712	1	0
109	MH5680	MH5712	0	0.0280651375576
110	MH5680	MH5712	1	0.970726813995
111	MH5680	MH5712	1	0.969814849448
112	MH5680	MH5712	0	0.0295447927408
113	MH5680	MH5712	0	0.0254233348291
114	MH5680	MH5712	1	0.974180214085
115	MH5680	MH5712	0.0302867619845	0
116	MH5680	MH5712	0.968505425536	1
117	MH5680	MH5712	1	0.929840606219
118	MH5680	MH5712	0	0.0692716158236
119	MH5680	MH5712	1	0.945211352139
120	MH5680	MH5712	0	0.0531150684198
121	MH5680	MH5712	0	0.118328348245
122	MH5680	MH5712	1	0.880418410042
123	MH5680	MH5712	0.975926577528	1
124	MH5680	MH5712	0.0233398308714	0
125	MH5295	MH5300	0	0.218282664535
126	MH5295	MH5300	1	0.781391317456
127	MH5295	MH5300	1	0
128	MH5295	MH5300	0	1
129	MH5295	MH5300	1	0
130	MH5295	MH5300	0	1
131	MH5295	MH5300	0.498412133084	1
132	MH5295	MH5300	0.501023951563	0
133	MH5295	MH5300	0	0.0255279958275
134	MH5295	MH5300	1	0.973598258029
135	MH5295	MH5300	0	1
136	MH5295	MH5300	1	0
137	MH5245	MH5295	0	1
138	MH5245	MH5295	1	0
139	MH5245	MH5295	0	1
140	MH5245	MH5295	1	0
141	MH5245	MH5295	1	0.498412133084
142	MH5245	MH5295	0	0.501023951563
143	MH5646	MH5645	0	0.0333888290793
144	MH5646	MH5645	1	0.965899753492
145	MH5646	MH5645	0.971704650447	1
146	MH5646	MH5645	0.0277332266909	0
147	HS1563	MH8690	0.088459720965	0
148	HS1563	MH8690	0.910545279846	1
149	HS1563	MH8690	0	0.12118464793
150	HS1563	MH8690	1	0.878513145966
151	HS1563	MH8690	0	0.0428052289357
152	HS1563	MH8690	1	0.95704845815
153	HS1563	MH8690	0.0999685429417	0
154	HS1563	MH8690	0.89923195999	1
155	HS1563	HS1564	0.088459720965	0
156	HS1563	HS1564	0.910545279846	1
157	HS1563	HS1564	0.0999685429417	0
158	HS1563	HS1564	0.89923195999	1
159	HS1563	HS1564	1	0.95006090134
160	HS1563	HS1564	0	0.0491766129568
161	MH8690	HS1564	0.12118464793	0
162	MH8690	HS1564	0.878513145966	1
163	MH8690	HS1564	0.0428052289357	0
164	MH8690	HS1564	0.95704845815	1
165	MH8690	HS1564	1	0.95006090134
166	MH8690	HS1564	0	0.0491766129568
167	HS1394	MH7843	1	0.972440562834
168	HS1394	MH7843	0	0.0267244631601
169	HS1345	HS1416	1	0.948241925382
170	HS1345	HS1416	0	0.0511608590998
171	HS1345	HS1416	1	0.272598938811
172	HS1345	HS1416	0	0.726086744877
173	HS1345	HS1416	0.0530355210076	0
174	HS1345	HS1416	0.946669290564	1
175	MH7612	HS1369	0.948812954577	1
176	MH7612	HS1369	0.0498634992657	0
177	MH7612	HS1369	0	0.0289683696738
178	MH7612	HS1369	1	0.968317833566
179	MH7612	HS1369	1	0.974870494875
180	MH7612	HS1369	0	0.0244745265716
181	MH7612	HS1369	0	0.0766430907023
182	MH7612	HS1369	1	0.922181135824
183	MH7612	HS1369	0	1
184	MH7612	HS1369	1	0
185	MH7612	HS1369	0	1
186	MH7612	HS1369	1	0
187	MH7612	HS1369	0	1
188	MH7612	HS1369	1	0
189	HS1336	HS1335	1	0.972760794576
190	HS1336	HS1335	0	0.0264987958706
191	HS1336	HS1335	0.975755873818	1
192	HS1336	HS1335	0.023682486193	0
193	HS1336	HS1335	0.978369781312	1
194	HS1336	HS1335	0.0208654028168	0
195	HS1336	HS1335	0.941019740826	1
196	HS1336	HS1335	0.0579359438968	0
197	HS1336	HS1335	1	0.963082296968
198	HS1336	HS1335	0	0.0360841803356
199	HS1417	MH8126	0	0.61421763106
200	HS1417	MH8126	1	0.38548294533
201	HS1417	MH8126	0.969717498814	1
202	HS1417	MH8126	0.0293693096763	0
203	HS1417	MH8126	1	0.977759990852
204	HS1417	MH8126	0	0.0213012737322
205	HS1516	HS1543	0.0451690779046	0
206	HS1516	HS1543	0.95445588521	1
207	HS1516	HS1543	0	1
208	HS1516	HS1543	1	0
209	HS1516	HS1543	1	0.870103442428
210	HS1516	HS1543	0	0.128879091063
211	HS1516	HS1543	1	0.946295232625
212	HS1516	HS1543	0	0.0521057992736
213	HS1516	HS1544	0.0451690779046	0
214	HS1516	HS1544	0.95445588521	1
215	HS1516	HS1544	0	0.0453344686054
216	HS1516	HS1544	1	0.954325867369
217	HS1516	HS1544	0	0.0983232879322
218	HS1516	HS1544	1	0.900798270414
219	MH7885	HS1409	1	0.93121305512
220	MH7885	HS1409	0	0.0680510202664
221	MH7390	MH7440	0	0.270574997689
222	MH7390	MH7440	1	0.726374193548
223	MH7390	MH7440	0	0.0201012039784
224	MH7390	MH7440	1	0.979340429244
225	MH7390	MH7440	0.958962304228	1
226	MH7390	MH7440	0.0404271939275	0
227	MH7390	MH7440	0.0393442047164	0
228	MH7390	MH7440	0.959584638207	1
229	MH7390	MH7440	0.977597751509	1
230	MH7390	MH7440	0.0214917213397	0
231	MH7390	MH7440	1	0.72442455243
232	MH7390	MH7440	0	0.273918168363
233	MH7390	MH7440	0.0291516541107	0
234	MH7390	MH7440	0.970629981439	1
235	HS1256	MH7390	0.960878953385	1
236	HS1256	MH7390	0.0380427122411	0
237	HS1256	MH7390	0	1
238	HS1256	MH7390	1	0
239	HS1256	MH7390	0.0353873297077	0
240	HS1256	MH7390	0.964169309855	1
241	HS1256	MH7390	1	0.958962304228
242	HS1256	MH7390	0	0.0404271939275
243	HS1256	MH7390	0	0.0393442047164
244	HS1256	MH7390	1	0.959584638207
245	HS1256	MH7390	1	0.977597751509
246	HS1256	MH7390	0	0.0214917213397
247	HS1256	MH7390	0.0374481830523	0
248	HS1256	MH7390	0.961405602311	1
249	HS1256	MH7390	0	0.0291516541107
250	HS1256	MH7390	1	0.970629981439
251	MH8386	HS1507	0.916894163625	0.920677049427
252	MH8386	HS1507	0.0827123981284	0.0788221743703
253	MH8386	HS1507	1	0.955496453901
254	MH8386	HS1507	0	0.0424511804139
255	MH8386	HS1507	0.962628396591	0.959764579989
256	MH8386	HS1507	0.0367014627226	0.0394071034315
257	HS1313	MH7564	0.230503852869	0.966235030142
258	HS1313	MH7564	0.768498087673	0.0333324322132
259	MH7564	HS1327	0.966235030142	0.0395296954463
260	MH7564	HS1327	0.0333324322132	0.959534628643
261	MH7385	HS1294	0	0.0665395939678
262	MH7385	HS1294	1	0.932403546273
263	MH7385	HS1294	1	0.834642651849
264	MH7385	HS1294	0	0.163602839312
265	HS1250	HS1253	0.959077969318	1
266	HS1250	HS1253	0.0406848015183	0
267	MH8159	HS1465	0.037064665189	0
268	MH8159	HS1465	0.961906788678	1
269	MH8041	MH8159	0	0.037064665189
270	MH8041	MH8159	1	0.961906788678
271	MH8041	MH8159	0.977730178159	1
272	MH8041	MH8159	0.0220178065715	0
273	MH7953	MH8160	1	0.970779062393
274	MH7953	MH8160	0	0.0282610972159
275	MH7953	MH8160	0.924696473309	1
276	MH7953	MH8160	0.0748051062923	0
277	HS1341	HS1375	0.968165966199	1
278	HS1341	HS1375	0.0314763480283	0
279	HS1341	HS1375	0.154494567149	0
280	HS1341	HS1375	0.844894745566	1
281	HS1341	HS1375	0.0426954659953	0
282	HS1341	HS1375	0.956246036779	1
283	HS1341	HS1375	0	0.0541025374848
284	HS1341	HS1375	1	0.944878533883
285	HS1341	HS1375	1	0.653853472883
286	HS1341	HS1375	0	0.334157944814
287	MH7687	HS1402	0.0250320272215	0
288	MH7687	HS1402	0.974332555532	1
289	MH7687	HS1402	0.969678648085	1
290	MH7687	HS1402	0.029538641251	0
291	HS1402	HS1401	1	0.965413916688
292	HS1402	HS1401	0	0.0341160572648
293	HS1595	MH8924	0.967664515292	1
294	HS1595	MH8924	0.0315552982759	0
295	HS1595	MH8924	0.0309374082531	0
296	HS1595	MH8924	0.968531609776	1
297	HS1595	MH8924	1	0.941297188947
298	HS1595	MH8924	0	0.0575332766257
299	HS1595	MH8924	0.897309668783	1
300	HS1595	MH8924	0.102067566964	0
301	HS1595	MH8924	0	0.0588249709766
302	HS1595	MH8924	1	0.940852665281
303	HS1595	MH8924	0.974974224388	1
304	HS1595	MH8924	0.0243697569459	0
305	HS1595	MH8924	0	0.0511922627981
306	HS1595	MH8924	1	0.948307487077
307	HS1595	MH8924	0.0383825176499	0
308	HS1595	MH8924	0.961023714487	1
309	MH8088	MH8089	0.0413910882347	0
310	MH8088	MH8089	0.957891867952	1
311	MH8088	MH8089	0	0.167855170801
312	MH8088	MH8089	1	0.831421540791
313	MH8088	MH8089	0.0417286269701	0
314	MH8088	MH8089	0.956728102077	1
315	MH8088	MH8089	0.869842130226	0
316	MH8088	MH8089	0.129615827631	1
317	MH8088	MH8089	0	0.0505068125595
318	MH8088	MH8089	1	0.948379940151
319	MH8088	MH8089	0.0209838939155	0
320	MH8088	MH8089	0.978439886211	1
321	MH8088	MH8089	0.0358219006488	0
322	MH8088	MH8089	0.96334971335	1
323	MH8088	MH8089	0	0.0756390477738
324	MH8088	MH8089	1	0.923268468136
325	MH8088	MH8089	0	0.020260001288
326	MH8088	MH8089	1	0.978477592472
327	MH8088	MH8089	0.971588523443	1
328	MH8088	MH8089	0.0276076825647	0
329	MH8088	MH8089	1	0.782812718868
330	MH8088	MH8089	0	0.216517063177
331	MH8088	MH8089	0.0451564601606	0
332	MH8088	MH8089	0.954429572976	1
333	MH8088	MH8089	1	0.763922383408
334	MH8088	MH8089	0	0.235793987068
335	MH8088	MH8089	0.972815346797	1
336	MH8088	MH8089	0.0269257841865	0
337	MH8088	MH8089	0.613295395758	1
338	MH8088	MH8089	0.385372324046	0
339	HS1519	HS1518	0.974884070686	1
340	HS1519	HS1518	0.0241204928038	0
341	HS1519	HS1518	1	0.668688425709
342	HS1519	HS1518	0	0.322934269415
343	HS1519	HS1520	0.974884070686	1
344	HS1519	HS1520	0.0241204928038	0
345	HS1519	HS1520	0	0.0897057347185
346	HS1519	HS1520	1	0.909609735627
347	MH8392	HS1505	0	0.340472493385
348	MH8392	HS1505	1	0.659043348281
349	HS1535	HS1536	0.798242649544	1
350	HS1535	HS1536	0.199797392055	0
351	HS1535	HS1536	0.955183424069	1
352	HS1535	HS1536	0.0444150083966	0
353	HS1535	HS1536	0	0.0824818441073
354	HS1535	HS1536	1	0.916505876162
355	HS1535	HS1536	0	1
356	HS1535	HS1536	1	0
357	HS1450	MH8309	0.961477309733	1
358	HS1450	MH8309	0.0378270981645	0
359	HS1450	MH8309	0.939296549596	0
360	HS1450	MH8309	0.0600349668329	1
361	HS1450	MH8309	0	1
362	HS1450	MH8309	1	0
363	HS1450	MH8309	0	1
364	HS1450	MH8309	1	0
365	MH8090	HS1445	0.501867849638	0.0619220607662
366	MH8090	HS1445	0.497550142941	0.937087186262
367	HS1391	HS1390	0	0.0588456364788
368	HS1391	HS1390	1	0.940688538962
369	HS1391	HS1390	0	0.213904415309
370	HS1391	HS1390	1	0.785084637496
371	HS1391	HS1390	0	0.0487008376097
372	HS1391	HS1390	1	0.950439288128
373	HS1391	HS1390	1	0.906827486998
374	HS1391	HS1390	0	0.0922304890917
375	HS1391	HS1390	0	0.220772809253
376	HS1391	HS1390	1	0.777876895629
377	MH2737	MH2706	0	0.244784202836
378	MH2737	MH2706	1	0.753263467549
379	MH2737	MH2706	0.969566608597	1
380	MH2737	MH2706	0.030090113646	0
381	MH2737	MH2706	0.0435569743186	0
382	MH2737	MH2706	0.9555257099	1
383	MH2737	MH2706	0.0204055618074	0
384	MH2737	MH2706	0.978886168911	1
385	MH2737	MH2706	0.949770190414	1
386	MH2737	MH2706	0.0498535396754	0
387	MH2737	MH2706	0.0617749564066	0
388	MH2737	MH2706	0.937721382774	1
389	MH2737	MH2706	0	0.0221180140336
390	MH2737	MH2706	1	0.977250944354
391	MH2737	MH2706	0	0.190678829115
392	MH2737	MH2706	1	0.807900130427
393	MH2737	MH2706	0	0.716619134042
394	MH2737	MH2706	1	0.28281320686
395	MH8690	HS1563	0	0.088459720965
396	MH8690	HS1563	1	0.910545279846
397	MH8690	HS1563	0.12118464793	0
398	MH8690	HS1563	0.878513145966	1
399	MH8690	HS1563	0.0428052289357	0
400	MH8690	HS1563	0.95704845815	1
401	MH8690	HS1563	0	0.0999685429417
402	MH8690	HS1563	1	0.89923195999
403	HS1564	HS1563	0	0.088459720965
404	HS1564	HS1563	1	0.910545279846
405	HS1564	HS1563	0	0.0999685429417
406	HS1564	HS1563	1	0.89923195999
407	HS1564	HS1563	0.95006090134	1
408	HS1564	HS1563	0.0491766129568	0
409	HS1564	MH8690	0	0.12118464793
410	HS1564	MH8690	1	0.878513145966
411	HS1564	MH8690	0	0.0428052289357
412	HS1564	MH8690	1	0.95704845815
413	HS1564	MH8690	0.95006090134	1
414	HS1564	MH8690	0.0491766129568	0
415	MH7843	HS1394	0.972440562834	1
416	MH7843	HS1394	0.0267244631601	0
417	HS1409	MH7885	0.93121305512	1
418	HS1409	MH7885	0.0680510202664	0
