# Supplementary material for: Stochastic processes constrain the within and between host evolution of influenza virus
Source: eLife journal article supplement (doi:10.7554/elife.35962), 2018-04-23
Supplement: supp [file elife-35962-supp-v1.zip › elife_poa_e35962_Figure_3_source_data_4.csv]

	s	prob	lower	upper
1	0	1.11022302462516e-16	1.11022302462516e-16	0
2	0.01	0.0167486205584443	0.0126164529022688	0.0240075711762343
3	0.02	0.0333053288436526	0.0251712778807147	0.0475064904455743
4	0.03	0.0496723238618351	0.0376647759709005	0.0705075346900492
5	0.04	0.0658517794221248	0.0500972467379118	0.0930212524603208
6	0.05	0.081845844425296	0.0624689882835415	0.11505796881337
7	0.06	0.0976566431491734	0.0747802972534355	0.136627790047693
8	0.07	0.113286275530773	0.0870314688442081	0.157740608338166
9	0.08	0.128736817445207	0.0992227968105182	0.178406106272718
10	0.09	0.144010320981395	0.111354573472113	0.198633761292875
11	0.1	0.159108814714615	0.123427089720839	0.218432850040232
12	0.11	0.174034303975935	0.135440635027614	0.237812452610824
13	0.12	0.188788771118549	0.14739549744937	0.256781456719372
14	0.13	0.203374175781071	0.159291963635961	0.275348561775289
15	0.14	0.217792455147807	0.171130318837033	0.293522282872335
16	0.15	0.232045524206042	0.182910846908866	0.311310954693736
17	0.16	0.246135276000385	0.194633830321179	0.328722735334575
18	0.17	0.260063581884199	0.206299550163906	0.345765610043181
19	0.18	0.273832291768141	0.217908286153931	0.362447394883268
20	0.19	0.287443234365867	0.229460316641798	0.378775740318468
21	0.2	0.300898217436916	0.240955918618386	0.394758134720926
22	0.21	0.314199028026804	0.252395367721547	0.410401907805556
23	0.22	0.327347432704379	0.26377893824272	0.425714233991535
24	0.23	0.340345177796449	0.275106903133504	0.440702135692574
25	0.24	0.353193989619726	0.286379534012204	0.455372486537486
26	0.25	0.365895574710104	0.297597101170343	0.469732014522504
27	0.26	0.378451620049319	0.308759873579146	0.48378730509683
28	0.27	0.390863793289008	0.319868118895984	0.497544804182791
29	0.28	0.403133742972201	0.330922103470799	0.511010821132021
30	0.29	0.415263098752274	0.341922092352483	0.524191531619002
31	0.3	0.427253471609394	0.352868349295237	0.5370929804733
32	0.31	0.439106454064484	0.363761136764896	0.549721084451797
33	0.32	0.450823620390739	0.374600715945221	0.562081634952187
34	0.33	0.462406526822712	0.385387346744162	0.574180300668975
35	0.34	0.473856711763008	0.396121287800087	0.586022630193212
36	0.35	0.485175695986612	0.40680279648799	0.597614054557141
37	0.36	0.496364982842873	0.417432128925655	0.608959889724934
38	0.37	0.50742605845517	0.428009539979805	0.620065339030657
39	0.38	0.518360391918297	0.438535283272205	0.63093549556458
40	0.39	0.529169435493586	0.449009611185748	0.641575344508924
41	0.4	0.539854624801784	0.459432774870505	0.651989765424132
42	0.41	0.550417379013734	0.46980502424975	0.662183534486688
43	0.42	0.560859101038862	0.480126608025947	0.672161326679528
44	0.43	0.571181177711506	0.490397773686718	0.681927717936046
45	0.44	0.581384979975111	0.500618767510777	0.691487187238667
46	0.45	0.591471863064314	0.51078983457383	0.700844118672964
47	0.46	0.601443166684942	0.520911218754459	0.71000280343825
48	0.47	0.611300215191945	0.530983162739964	0.718967441815573
49	0.48	0.621044317765295	0.541005908032184	0.727742145094015
50	0.49	0.630676768583865	0.550979694953287	0.736330937456178
51	0.5	0.640198846997318	0.560904762651535	0.744737757823721
52	0.51	0.649611817696026	0.570781349107013	0.752966461663795
53	0.52	0.658916930879043	0.580609691137341	0.761020822757208
54	0.53	0.66811542242015	0.590390024403348	0.768904534929124
55	0.54	0.677208514032001	0.600122583414726	0.776621213743097
56	0.55	0.686197413428386	0.609807601535649	0.784174398159206
57	0.56	0.695083314484638	0.619445310990372	0.791567552157069
58	0.57	0.703867397396195	0.629035942868798	0.798804066324466
59	0.58	0.712550828835354	0.63857972713202	0.805887259412296
60	0.59	0.721134762106221	0.648076892617832	0.812820379856601
61	0.6	0.729620337297891	0.657527667046218	0.819606607268336
62	0.61	0.738008681435872	0.666932277024815	0.826249053891575
63	0.62	0.746300908631768	0.67629094805434	0.832750766030823
64	0.63	0.754498120231258	0.685603904534002	0.839114725448089
65	0.64	0.762601404960366	0.694871369766882	0.845343850730356
66	0.65	0.770611839070069	0.704093565965286	0.851440998628078
67	0.66	0.778530486479235	0.713270714256074	0.857408965365322
68	0.67	0.786358398915933	0.722403034685959	0.863250487922149
69	0.68	0.794096616057119	0.731490746226791	0.868968245289825
70	0.69	0.80174616566672	0.740534066780797	0.874564859699436
71	0.7	0.809308063732142	0.749533213185816	0.880042897824479
72	0.71	0.816783314599209	0.758488401220489	0.885404871957963
73	0.72	0.824172911105554	0.767399845609441	0.89065324116458
74	0.73	0.831477834712487	0.776267760028424	0.895790412408462
75	0.74	0.838699055635349	0.785092357109443	0.900818741657039
76	0.75	0.845837532972374	0.793873848445853	0.905740534961518
77	0.76	0.852894214832069	0.802612444597434	0.91055804951446
78	0.77	0.859870038459142	0.811308355095438	0.915273494684962
79	0.78	0.866765930358986	0.819961788447617	0.919889033031895
80	0.79	0.873582806420726	0.828572952143216	0.92440678129568
81	0.8	0.880321572038874	0.837142052657953	0.92882881136905
82	0.81	0.886983122233575	0.84566929545897	0.933157151247246
83	0.82	0.893568341769481	0.854154885009757	0.937393785958077
84	0.83	0.900078105273262	0.862599024775055	0.94154065847228
85	0.84	0.906513277349774	0.871001917225736	0.945599670594588
86	0.85	0.91287471269689	0.879363763843659	0.94957268383592
87	0.86	0.919163256219021	0.887684765126496	0.953461520267091
88	0.87	0.925379743139327	0.895965120592544	0.957267963354437
89	0.88	0.931524999110658	0.904205028785508	0.960993758777734
90	0.89	0.937599840325205	0.912404687279262	0.964640615230785
91	0.9	0.943605073622912	0.920564292682584	0.96821020520505
92	0.91	0.949541496598631	0.928684040643873	0.971704165756666
93	0.92	0.95540989770806	0.936764125855838	0.975124099257226
94	0.93	0.961211056372463	0.944804742060168	0.978471574128642
95	0.94	0.966945743082188	0.952806082052177	0.981748125562442
96	0.95	0.972614719499	0.960768337685427	0.984955256223828
97	0.96	0.978218738557249	0.968691699876325	0.988094436940815
98	0.97	0.983758544563863	0.976576358608709	0.991167107378772
99	0.98	0.989234873297211	0.984422502938392	0.994174676700666
100	0.99	0.994648452104824	0.992230320997704	0.997118524213324
101	1	1	1	1
