# Supplementary material for: Stochastic processes constrain the within and between host evolution of influenza virus
Source: eLife journal article supplement (doi:10.7554/elife.35962), 2018-04-23
Supplement: supp [file elife-35962-supp-v1.zip › elife_poa_e35962_Figure_3_source_data_5.csv]

	SPECID1	SPECID2	freq1	freq2
1	HS1516	HS1543	0.0451690779046	0
2	HS1516	HS1543	0.95445588521	1
3	HS1516	HS1544	0.0451690779046	0
4	HS1516	HS1544	0.95445588521	1
5	MH8088	MH8089	0.0413910882347	0
6	MH8088	MH8089	0.957891867952	1
7	MH7612	HS1369	0.948812954577	1
8	MH7612	HS1369	0.0498634992657	0
9	MH8088	MH8089	0.0417286269701	0
10	MH8088	MH8089	0.956728102077	1
11	HS1595	MH8924	0.967664515292	1
12	HS1595	MH8924	0.0315552982759	0
13	HS1409	MH7885	0.93121305512	1
14	HS1409	MH7885	0.0680510202664	0
15	HS1450	MH8309	0.961477309733	1
16	HS1450	MH8309	0.0378270981645	0
17	MH5712	MH5709	0.0242193827197	0
18	MH5712	MH5709	0.975386565971	1
19	HS1256	MH7390	0.960878953385	1
20	HS1256	MH7390	0.0380427122411	0
21	MH8088	MH8089	0.869842130226	0
22	MH8088	MH8089	0.129615827631	1
23	HS1595	MH8924	0.0309374082531	0
24	HS1595	MH8924	0.968531609776	1
25	HS1519	HS1518	0.974884070686	1
26	HS1519	HS1518	0.0241204928038	0
27	HS1519	HS1520	0.974884070686	1
28	HS1519	HS1520	0.0241204928038	0
29	MH8088	MH8089	0.0209838939155	0
30	MH8088	MH8089	0.978439886211	1
31	HS1535	HS1536	0.798242649544	1
32	HS1535	HS1536	0.199797392055	0
33	MH8088	MH8089	0.0358219006488	0
34	MH8088	MH8089	0.96334971335	1
35	M54586	M54585	0.643225219764	1
36	M54586	M54585	0.354978951595	0
37	HS1417	MH8126	0.969717498814	1
38	HS1417	MH8126	0.0293693096763	0
39	MH2706	MH2737	0.244784202836	0
40	MH2706	MH2737	0.753263467549	1
41	HS1336	HS1335	0.975755873818	1
42	HS1336	HS1335	0.023682486193	0
43	M54586	M54585	0.146442011944	0
44	M54586	M54585	0.852133255406	1
45	HS1250	HS1253	0.959077969318	1
46	HS1250	HS1253	0.0406848015183	0
47	HS1535	HS1536	0.955183424069	1
48	HS1535	HS1536	0.0444150083966	0
49	HS1256	MH7390	0.0353873297077	0
50	HS1256	MH7390	0.964169309855	1
51	MH7390	MH7440	0.958962304228	1
52	MH7390	MH7440	0.0404271939275	0
53	M54206	M54205	0.2542518546	0
54	M54206	M54205	0.744905154785	1
55	M54206	M54207	0.2542518546	0
56	M54206	M54207	0.744905154785	1
57	M54586	M54585	0.0982668055415	0
58	M54586	M54585	0.900528978841	1
59	HS1341	HS1375	0.968165966199	1
60	HS1341	HS1375	0.0314763480283	0
61	MH7843	HS1394	0.972440562834	1
62	MH7843	HS1394	0.0267244631601	0
63	MH5712	MH5709	0.0280651375576	0
64	MH5712	MH5709	0.970726813995	1
65	HS1450	MH8309	0.939296549596	0
66	HS1450	MH8309	0.0600349668329	1
67	MH2737	MH2706	0.969566608597	1
68	MH2737	MH2706	0.030090113646	0
69	MH7390	MH7440	0.0393442047164	0
70	MH7390	MH7440	0.959584638207	1
71	MH2737	MH2706	0.0435569743186	0
72	MH2737	MH2706	0.9555257099	1
73	MH1205	MH1346	0.976673427992	0
74	MH1205	MH1346	0.0228194726166	1
75	MH8159	HS1465	0.037064665189	0
76	MH8159	HS1465	0.961906788678	1
77	MH2737	MH2706	0.0204055618074	0
78	MH2737	MH2706	0.978886168911	1
79	MH8090	HS1445	0.501867849638	0.0619220607662
80	MH8090	HS1445	0.497550142941	0.937087186262
81	MH2737	MH2706	0.949770190414	1
82	MH2737	MH2706	0.0498535396754	0
83	MH8386	HS1507	0.916894163625	0.920677049427
84	MH8386	HS1507	0.0827123981284	0.0788221743703
85	MH5712	MH5709	0.0254233348291	0
86	MH5712	MH5709	0.974180214085	1
87	MH7687	HS1402	0.0250320272215	0
88	MH7687	HS1402	0.974332555532	1
89	MH7687	HS1402	0.969678648085	1
90	MH7687	HS1402	0.029538641251	0
91	HS1313	MH7564	0.230503852869	0.966235030142
92	HS1313	MH7564	0.768498087673	0.0333324322132
93	MH7564	HS1327	0.966235030142	0.0395296954463
94	MH7564	HS1327	0.0333324322132	0.959534628643
95	HS1595	MH8924	0.897309668783	1
96	HS1595	MH8924	0.102067566964	0
97	MH8690	HS1563	0.12118464793	0
98	MH8690	HS1563	0.878513145966	1
99	MH8690	HS1564	0.12118464793	0
100	MH8690	HS1564	0.878513145966	1
101	MH5680	MH5712	0.0302867619845	0
102	MH5680	MH5712	0.968505425536	1
103	MH7390	MH7440	0.977597751509	1
104	MH7390	MH7440	0.0214917213397	0
105	HS1345	HS1416	0.0530355210076	0
106	HS1345	HS1416	0.946669290564	1
107	MH8088	MH8089	0.971588523443	1
108	MH8088	MH8089	0.0276076825647	0
109	HS1563	HS1564	0.088459720965	0
110	HS1563	HS1564	0.910545279846	1
111	HS1563	MH8690	0.088459720965	0
112	HS1563	MH8690	0.910545279846	1
113	MH5712	MH5709	0.969814849448	1
114	MH5712	MH5709	0.0295447927408	0
115	MH5646	MH5645	0.971704650447	1
116	MH5646	MH5645	0.0277332266909	0
117	MH5295	MH5300	0.498412133084	1
118	MH5295	MH5300	0.501023951563	0
119	M54375	M54374	0.19627190774	0
120	M54375	M54374	0.803436078828	1
121	HS1341	HS1375	0.154494567149	0
122	HS1341	HS1375	0.844894745566	1
123	HS1595	MH8924	0.974974224388	1
124	HS1595	MH8924	0.0243697569459	0
125	MH5712	MH5709	0.945211352139	1
126	MH5712	MH5709	0.0531150684198	0
127	MH5712	MH5709	0.118328348245	0
128	MH5712	MH5709	0.880418410042	1
129	HS1256	MH7390	0.0374481830523	0
130	HS1256	MH7390	0.961405602311	1
131	HS1341	HS1375	0.0426954659953	0
132	HS1341	HS1375	0.956246036779	1
133	MH8690	HS1563	0.0428052289357	0
134	MH8690	HS1563	0.95704845815	1
135	MH8690	HS1564	0.0428052289357	0
136	MH8690	HS1564	0.95704845815	1
137	MH7390	MH7440	0.0291516541107	0
138	MH7390	MH7440	0.970629981439	1
139	MH2706	MH2737	0.190678829115	0
140	MH2706	MH2737	0.807900130427	1
141	MH7953	MH8160	0.924696473309	1
142	MH7953	MH8160	0.0748051062923	0
143	MH8041	MH8159	0.977730178159	1
144	MH8041	MH8159	0.0220178065715	0
145	MH2737	MH2706	0.0617749564066	0
146	MH2737	MH2706	0.937721382774	1
147	HS1336	HS1335	0.978369781312	1
148	HS1336	HS1335	0.0208654028168	0
149	MH5712	MH5709	0.929840606219	1
150	MH5712	MH5709	0.0692716158236	0
151	MH2706	MH2737	0.0221180140336	0
152	MH2706	MH2737	0.977250944354	1
153	HS1336	HS1335	0.941019740826	1
154	HS1336	HS1335	0.0579359438968	0
155	MH8088	MH8089	0.0451564601606	0
156	MH8088	MH8089	0.954429572976	1
157	HS1563	HS1564	0.0999685429417	0
158	HS1563	HS1564	0.89923195999	1
159	HS1563	MH8690	0.0999685429417	0
160	HS1563	MH8690	0.89923195999	1
161	HS1595	MH8924	0.0383825176499	0
162	HS1595	MH8924	0.961023714487	1
163	MH8088	MH8089	0.972815346797	1
164	MH8088	MH8089	0.0269257841865	0
165	MH8386	HS1507	0.962628396591	0.959764579989
166	MH8386	HS1507	0.0367014627226	0.0394071034315
167	MH8088	MH8089	0.613295395758	1
168	MH8088	MH8089	0.385372324046	0
169	HS1564	HS1563	0.95006090134	1
170	HS1564	HS1563	0.0491766129568	0
171	HS1564	MH8690	0.95006090134	1
172	HS1564	MH8690	0.0491766129568	0
173	MH5680	MH5712	0.975926577528	1
174	MH5680	MH5712	0.0233398308714	0
175	M54206	M54205	0.38327738606	0.0208223762568
176	M54206	M54205	0.616380608251	0.978525345622
177	M54206	M54207	0.38327738606	0.823475258918
178	M54206	M54207	0.616380608251	0.176179516686
179	MH2706	MH2737	0.716619134042	0
180	MH2706	MH2737	0.28281320686	1
