# Supplementary material for: Stochastic processes constrain the within and between host evolution of influenza virus
Source: eLife journal article supplement (doi:10.7554/elife.35962), 2018-04-23
Supplement: supp [file elife-35962-supp-v1.zip › elife_poa_e35962_Figure_3_source_data_6.csv]

	s	prob	lower	upper
1	0	0	2.22044604925031e-16	0
2	0.01	0.0163383785465986	0.0126032027926776	0.0223416368246547
3	0.02	0.0325066431976904	0.0251462839337068	0.0442856117910871
4	0.03	0.0485063243460094	0.0376294937303223	0.0658379195448145
5	0.04	0.0643389415501124	0.0500530816404486	0.0870044889024186
6	0.05	0.0800060035719274	0.0624172962744816	0.107791182948125
7	0.06	0.0955090084148115	0.0747223853970782	0.128203799151694
8	0.07	0.110849443362115	0.0869685959289437	0.148248069506822
9	0.08	0.126028785016222	0.099156173948628	0.167929660689295
10	0.09	0.141048499338063	0.111285364694324	0.187254174234132
11	0.1	0.155910041687093	0.123356412565666	0.206227146730994
12	0.11	0.170614856861699	0.135369561125535	0.224854050037146
13	0.12	0.185164379140048	0.147325053101867	0.243140291507274
14	0.13	0.199560032321346	0.159223130389461	0.261091214239475
15	0.14	0.213803229767508	0.171064034051798	0.278712097336782
16	0.15	0.22789537444521	0.18284800432285	0.29600815618355
17	0.16	0.241837858968325	0.194575280608907	0.312984542736104
18	0.17	0.255632065640729	0.206246101490394	0.329646345827035
19	0.18	0.269279366499452	0.217860704723699	0.345998591482538
20	0.19	0.282781123358181	0.229419327243002	0.362046243252232
21	0.2	0.296138687851083	0.240922205162101	0.377794202550888
22	0.21	0.309353401476963	0.252369573776252	0.393247309011533
23	0.22	0.322426595643712	0.263761667564	0.408410340849378
24	0.23	0.335359591713067	0.275098720189021	0.423288015236075
25	0.24	0.348153701045645	0.286380964501957	0.437884988683785
26	0.25	0.360810225046259	0.297608632542267	0.452205857438579
27	0.26	0.373330455209498	0.308781955540066	0.466255157882679
28	0.27	0.385715673165555	0.319901163917976	0.480037366945106
29	0.28	0.397967150726308	0.330966487292977	0.493556902520253
30	0.29	0.410086149931625	0.341978154478255	0.506818123893976
31	0.3	0.422073923095902	0.35293639348506	0.519825332176754
32	0.31	0.433931712854806	0.36384143152456	0.53258277074353
33	0.32	0.445660752212228	0.374693495009702	0.545094625679814
34	0.33	0.457262264587428	0.385492809557066	0.557365026233666
35	0.34	0.46873746386237	0.396239599988733	0.569398045273189
36	0.35	0.480087554429228	0.406934090334146	0.581197699749157
37	0.36	0.491313731238061	0.417576503831975	0.592767951162427
38	0.37	0.50241717984465	0.428167062931985	0.604112706035794
39	0.38	0.513399076458482	0.438705989296903	0.615235816389942
40	0.39	0.524260587990875	0.449193503804289	0.62614108022319
41	0.4	0.535002872103242	0.459629826548409	0.636832241994696
42	0.41	0.545627077255471	0.470015176842105	0.647312993110829
43	0.42	0.556134342754427	0.48034977321867	0.657586972414408
44	0.43	0.566525798802569	0.490633833433729	0.667657766676528
45	0.44	0.576802566546656	0.500867574467106	0.677528911090687
46	0.45	0.586965758126555	0.511051212524713	0.68720388976896
47	0.46	0.597016476724135	0.52118496304042	0.696686136239947
48	0.47	0.606955816612236	0.531269040677941	0.705979033948256
49	0.48	0.616784863203714	0.541303659332715	0.715085916755265
50	0.49	0.626504693100547	0.551289032133787	0.724010069440951
51	0.5	0.636116374143001	0.561225371445693	0.73275472820653
52	0.51	0.645620965458848	0.57111288887034	0.741323081177709
53	0.52	0.65501951751262	0.5809517952489	0.749718268908344
54	0.53	0.664313072154914	0.590742300663687	0.757943384884272
55	0.54	0.673502662671716	0.600484614440049	0.766001476027151
56	0.55	0.682589313833758	0.610178945148254	0.773895543198095
57	0.56	0.691574041945886	0.619825500605377	0.781628541700937
58	0.57	0.700457854896448	0.629424487877193	0.789203381784925
59	0.58	0.709241752206682	0.63897611328006	0.796622929146703
60	0.59	0.717926725080113	0.648480582382814	0.803890005431391
61	0.6	0.726513756451932	0.657938100008657	0.811007388732618
62	0.61	0.735003821038379	0.667348870237049	0.817977814091352
63	0.62	0.743397885386097	0.676713096405598	0.824803973993388
64	0.63	0.751696907921475	0.686030981111951	0.831488518865335
65	0.64	0.759901838999954	0.695302726215687	0.838034057568986
66	0.65	0.768013620955309	0.70452853284021	0.844443157893935
67	0.66	0.776033188148888	0.713708601374636	0.850718347048309
68	0.67	0.783961467018817	0.722843131475692	0.8568621121475
69	0.68	0.791799376129142	0.731932322069605	0.862876900700792
70	0.69	0.79954782621894	0.740976371353993	0.868765121095756
71	0.7	0.807207720251355	0.749975476799761	0.87452914308032
72	0.71	0.814779953462585	0.75892983515299	0.880171298242405
73	0.72	0.822265413410796	0.767839642436833	0.885693880487045
74	0.73	0.82966498002497	0.776705093953404	0.891099146510876
75	0.74	0.836979525653676	0.78552638428567	0.896389316273935
76	0.75	0.844209915113767	0.794303707299348	0.901566573468656
77	0.76	0.851357005738987	0.803037256144789	0.906633065986011
78	0.77	0.858421647428497	0.811727223258876	0.911590906378694
79	0.78	0.865404682695311	0.820373800366913	0.916442172321305
80	0.79	0.87230694671463	0.828977178484511	0.921188907067434
81	0.8	0.879129267372088	0.837537547919488	0.925833119903609
82	0.81	0.885872465311887	0.84605509827375	0.930376786600027
83	0.82	0.892537353984834	0.854530018445184	0.934821849858026
84	0.83	0.899124739696262	0.862962496629548	0.939170219754219
85	0.84	0.905635421653844	0.871352720322357	0.943423774181277
86	0.85	0.912070192015286	0.879700876320774	0.94758435928527
87	0.86	0.918429835935908	0.888007150725493	0.951653789899553
88	0.87	0.924715131616095	0.896271728942627	0.955633849975142
89	0.88	0.930926850348628	0.904494795685596	0.959526293007534
90	0.89	0.937065756565882	0.91267653497701	0.96333284245995
91	0.9	0.943132607886899	0.920817130150553	0.967055192182952
92	0.91	0.949128155164317	0.928916763852867	0.970695006830413
93	0.92	0.955053142531174	0.936975618045436	0.974253922271804
94	0.93	0.960908307447559	0.944993874006465	0.977733546000775
95	0.94	0.966694380747134	0.952971712332762	0.981135457540004
96	0.95	0.972412086683495	0.96090931294162	0.984461208842292
97	0.96	0.978062142976403	0.968806855072692	0.987712324687888
98	0.97	0.983645260857847	0.976664517289872	0.990890303078017
99	0.98	0.98916214511797	0.984482477483171	0.993996615624608
100	0.99	0.994613494150828	0.99226091287059	0.997032707936198
101	1	1	1	1
