# Supplementary material for: Stochastic processes constrain the within and between host evolution of influenza virus
Source: eLife journal article supplement (doi:10.7554/elife.35962), 2018-04-23
Supplement: supp [file elife-35962-supp-v1.zip › elife_poa_e35962_Figure_3_source_data_7.csv]

	Nb	CI	Subtype	donor_sample	recipient_sample	estimated_transmission_date	Donor_age	Recipient_age	minority_isnv	transmitted_minority_isnv	ENROLLID1	ENROLLID2	SPECID1	SPECID2	Used
1	1	1-4	A/H3N2	2011-03-11	2011-03-11	2011-03-07	4.47100214241223	5.71948773759899	3	0	300294	300293	M54586	M54585	TRUE
2	4	2-11	A/H1N1	2011-02-23	2011-02-23	2011-02-21	7.33485287172221	40.3731767250525	2	1	300331	300330	M54206	M54205	TRUE
3	3	2-10	A/H1N1	2011-02-23	2011-02-23	2011-02-21	7.33485287172221	4.15066702259458	2	1	300331	300332	M54206	M54207	TRUE
4	1	1-22	A/H3N2	2011-03-02	2011-03-02	2011-02-28	9.23769824157922	7.20890914940074	1	0	301023	301024	M54375	M54374	TRUE
5	1	1-1	A/H3N2	2012-03-08	2012-03-12	2012-03-10	7.84136566801509	42.8017002402513	1	1	321372	320645	MH1205	MH1346	TRUE
6	1	1-2	A/H3N2	2013-01-04	2013-01-07	2013-01-01	42.9358576835938	4.63527656283154	4	1	330441	331061	MH2706	MH2737	TRUE
7	1	1-48	A/H3N2	2013-01-07	2013-01-04	2013-01-01	4.63527656283154	42.9358576835938	5	0	331061	330441	MH2737	MH2706	TRUE
8	1	1-40	A/H3N2	2014-12-25	2014-12-25	2014-12-24	37.0247164555056	6.14933913769619	2	0	50001	50003	HS1563	HS1562	FALSE
9	1	1-29	A/H3N2	2014-12-25	2014-12-25	2014-12-24	37.0247164555056	3.61677515623182	2	0	50001	50004	HS1563	HS1564	TRUE
10	1	1-40	A/H3N2	2014-12-25	2014-12-31	2014-12-24	37.0247164555056	6.14933913769619	2	0	50001	50003	HS1563	MH8690	TRUE
11	1	1-39	A/H3N2	2014-12-31	2014-12-25	2014-12-24	6.14933913769619	3.61677515623182	2	0	50003	50004	MH8690	HS1564	TRUE
12	1	1-39	A/H3N2	2014-12-31	2014-12-25	2014-12-24	6.14933913769619	37.0247164555056	2	0	50003	50001	MH8690	HS1563	TRUE
13	1	1-58	A/H3N2	2014-12-31	2014-12-31	2014-12-24	6.14933913769619	37.0247164555056	2	0	50003	50001	MH8690	MH8688	FALSE
14	1	1-200	A/H3N2	2014-12-25	2014-12-25	2014-12-24	3.61677515623182	37.0247164555056	1	0	50004	50001	HS1564	HS1563	TRUE
15	1	1-200	A/H3N2	2014-12-25	2014-12-25	2014-12-24	3.61677515623182	6.14933913769619	1	0	50004	50003	HS1564	HS1562	FALSE
16	1	1-200	A/H3N2	2014-12-25	2014-12-31	2014-12-24	3.61677515623182	37.0247164555056	1	0	50004	50001	HS1564	MH8688	FALSE
17	1	1-200	A/H3N2	2014-12-25	2014-12-31	2014-12-24	3.61677515623182	6.14933913769619	1	0	50004	50003	HS1564	MH8690	TRUE
18	1	1-200	A/H3N2	2014-12-08	2014-12-07	2014-12-06	5.21571284831311	7.03642100796046	1	0	50007	50006	MH7843	HS1394	TRUE
19	1	1-200	A/H3N2	2014-12-08	2014-12-08	2014-12-06	5.21571284831311	7.03642100796046	1	0	50007	50006	MH7843	MH7842	FALSE
20	1	1-200	A/H3N2	2014-11-30	2014-12-07	2014-12-04	4.65717981888745	8.6244070720138	1	0	50307	50305	HS1345	HS1416	TRUE
21	1	1-200	A/H3N2	2014-11-30	2014-12-10	2014-12-04	4.65717981888745	8.6244070720138	1	0	50307	50305	HS1345	MH7890	FALSE
22	1	1-200	A/H3N2	2014-11-23	2014-11-25	2014-11-24	8.45191893057352	8.45191893057352	3	0	50318	50319	HS1336	HS1335	TRUE
23	1	1-200	A/H3N2	2014-11-26	2014-11-25	2014-11-24	8.45191893057352	8.45191893057352	3	0	50318	50319	MH7611	HS1335	FALSE
24	1	1-200	A/H3N2	2014-11-23	2014-11-26	2014-11-24	8.45191893057352	8.45191893057352	3	0	50318	50319	HS1336	MH7612	FALSE
25	1	1-200	A/H3N2	2014-11-26	2014-11-26	2014-11-24	8.45191893057352	8.45191893057352	3	0	50318	50319	MH7611	MH7612	FALSE
26	1	1-200	A/H3N2	2014-11-25	2014-11-30	2014-11-29	8.46560846560847	38.4347385641047	2	0	50319	50316	HS1335	HS1369	FALSE
27	1	1-200	A/H3N2	2014-11-26	2014-11-30	2014-11-29	8.46560846560847	38.4347385641047	1	0	50319	50316	MH7612	HS1369	TRUE
28	1	1-200	A/H3N2	2014-12-09	2014-12-15	2014-12-10	15.1953838887862	5.73317727263393	1	0	50331	50332	HS1417	MH8126	TRUE
29	1	1-200	A/H3N2	2014-12-10	2014-12-15	2014-12-10	15.1953838887862	5.73317727263393	2	0	50331	50332	MH7891	MH8126	FALSE
30	1	1-200	A/H3N2	2014-12-21	2014-12-24	2014-12-23	9.31162173076791	15.3240655181147	1	0	50468	50466	HS1516	HS1543	TRUE
31	1	1-200	A/H3N2	2014-12-21	2014-12-24	2014-12-23	9.31162173076791	11.0173377961218	1	0	50468	50467	HS1516	HS1544	TRUE
32	1	1-200	A/H3N2	2014-12-23	2014-12-24	2014-12-23	9.31162173076791	15.3240655181147	1	0	50468	50466	MH8439	HS1543	FALSE
33	1	1-200	A/H3N2	2014-12-23	2014-12-24	2014-12-23	9.31162173076791	11.0173377961218	1	0	50468	50467	MH8439	HS1544	FALSE
34	1	1-200	A/H3N2	2014-12-06	2014-12-09	2014-12-05	10.5683210469756	11.9838189695887	1	0	50540	50539	HS1409	MH7885	TRUE
35	1	1-18	A/H3N2	2014-12-09	2014-12-09	2014-12-05	10.5683210469756	11.9838189695887	2	0	50540	50539	MH7886	MH7885	FALSE
36	1	1-200	A/H3N2	2014-11-17	2014-11-19	2014-11-17	8.52310451275522	36.3758324948493	4	0	50552	50551	MH7390	MH7440	TRUE
37	1	1-200	A/H3N2	2014-11-16	2014-11-17	2014-11-16	6.19862146382198	8.52036660574823	3	0	50553	50552	HS1256	MH7390	TRUE
38	1	1-66	A/H3N2	2014-11-17	2014-11-17	2014-11-16	6.19862146382198	8.52036660574823	3	0	50553	50552	MH7391	MH7390	FALSE
39	>200	NA-NA	A/H3N2	2014-12-22	2014-12-21	2014-12-19	8.63809660704874	4.4545747003703	2	2	50556	50558	MH8386	HS1507	TRUE
40	2	2-3	A/H3N2	2014-11-25	2014-11-25	2014-11-24	10.8202084916186	8.94200428482447	1	1	50618	50619	MH7564	HS1327	TRUE
41	2	2-3	A/H3N2	2014-11-25	2014-11-25	2014-11-24	10.8202084916186	8.94200428482447	1	1	50618	50619	MH7564	MH7565	FALSE
42	4	2-12	A/H3N2	2014-11-24	2014-11-25	2014-11-23	7.1240340321841	10.8174705846116	1	1	50620	50618	MH7520	MH7564	FALSE
43	2	2-5	A/H3N2	2014-11-22	2014-11-25	2014-11-23	7.1240340321841	10.8174705846116	1	1	50620	50618	HS1313	MH7564	TRUE
44	1	1-2	A/H3N2	2014-11-22	2014-11-25	2014-11-23	7.1240340321841	10.8174705846116	1	1	50620	50618	HS1313	HS1328	FALSE
45	1	1-5	A/H3N2	2014-11-24	2014-11-25	2014-11-23	7.1240340321841	10.8174705846116	1	0	50620	50618	MH7520	HS1328	FALSE
46	1	1-200	A/H3N2	2014-11-10	2014-11-13	2014-11-12	39.7106032293613	2.37650328206602	1	0	50628	50632	HS1250	HS1253	TRUE
47	1	1-200	A/H3N2	2014-11-10	2014-11-14	2014-11-12	39.7106032293613	2.37650328206602	1	0	50628	50632	HS1250	MH7385	FALSE
48	1	1-200	A/H3N2	2014-12-16	2014-12-15	2014-12-14	44.1131576965988	43.2096483842926	1	0	50785	50784	MH8159	HS1465	TRUE
49	1	1-200	A/H3N2	2014-12-16	2014-12-16	2014-12-14	44.1131576965988	43.2096483842926	1	0	50785	50784	MH8159	MH8158	FALSE
50	1	1-200	A/H3N2	2014-12-12	2014-12-15	2014-12-13	10.6860510482761	44.1104197895918	1	0	50786	50785	MH8041	HS1463	FALSE
51	1	1-200	A/H3N2	2014-12-12	2014-12-16	2014-12-13	10.6860510482761	44.1104197895918	1	0	50786	50785	MH8041	MH8159	TRUE
52	1	1-200	A/H3N2	2014-12-10	2014-12-15	2014-12-13	5.48402773499798	37.9638185589026	2	0	50812	50809	HS1427	HS1460	FALSE
53	1	1-200	A/H3N2	2014-12-11	2014-12-15	2014-12-13	5.48402773499798	37.9638185589026	1	0	50812	50809	MH7953	HS1460	FALSE
54	1	1-200	A/H3N2	2014-12-10	2014-12-16	2014-12-13	5.48402773499798	37.9638185589026	2	0	50812	50809	HS1427	MH8160	FALSE
55	1	1-200	A/H3N2	2014-12-11	2014-12-16	2014-12-13	5.48402773499798	37.9638185589026	1	0	50812	50809	MH7953	MH8160	TRUE
56	1	1-22	A/H3N2	2014-11-30	2014-12-05	2014-12-03	6.44777100145794	39.7188169503823	3	0	50832	50830	HS1341	HS1375	TRUE
57	1	1-200	A/H3N2	2014-12-01	2014-12-04	2014-12-03	17.8319883365162	51.9189305735231	1	0	50969	50967	HS1351	HS1402	FALSE
58	1	1-200	A/H3N2	2014-12-02	2014-12-04	2014-12-03	17.8319883365162	51.9189305735231	2	0	50969	50967	MH7687	HS1402	TRUE
59	1	1-37	A/H3N2	2015-01-06	2015-01-09	2015-01-04	5.87281052999035	5.87281052999035	5	0	50993	50992	HS1595	MH8924	TRUE
60	1	1-200	A/H3N2	2015-01-09	2015-01-09	2015-01-04	5.87281052999035	5.87281052999035	4	0	50993	50992	MH8925	MH8924	FALSE
61	1	1-1	A/H3N2	2014-12-15	2014-12-15	2014-12-11	33.826841071343	3.03086305673628	9	1	51041	51043	MH8088	MH8089	TRUE
62	1	1-200	A/H3N2	2014-12-20	2014-12-22	2014-12-21	10.2096552290601	36.1567999342902	1	0	51058	51057	HS1519	HS1518	TRUE
63	1	1-200	A/H3N2	2014-12-20	2014-12-22	2014-12-21	10.2096552290601	8.08777729864405	1	0	51058	51059	HS1519	HS1520	TRUE
64	1	1-200	A/H3N2	2014-12-20	2014-12-23	2014-12-21	10.2096552290601	8.08777729864405	1	0	51058	51059	HS1519	MH8445	FALSE
65	1	1-14	A/H3N2	2014-12-26	2014-12-27	2014-12-26	46.6676249341191	46.465019815602	2	0	51138	51137	HS1535	HS1536	TRUE
66	1	1-2	A/H3N2	2014-12-12	2014-12-18	2014-12-16	8.50120125669932	42.8400309383492	2	1	51220	51216	HS1450	MH8309	TRUE
67	4	2-13	A/H3N2	2014-12-15	2014-12-15	2014-12-14	9.9112233652984	8.13979753177683	1	1	51335	51336	MH8090	HS1445	TRUE
68	1	1-200	A/H1N1	2014-01-03	2014-01-07	2014-01-02	36.3594050528074	0.632456518614345	2	0	UM40093	UM41510	MH5680	MH5712	TRUE
69	1	1-200	A/H1N1	2013-12-30	2013-12-30	2013-12-28	4.86799865842557	36.1814410973531	1	0	UM40460	UM40457	MH5646	MH5645	TRUE
70	1	1-9	A/H1N1	2014-01-07	2014-01-07	2014-01-03	0.635194425621334	6.11374634660534	7	0	UM41510	UM40095	MH5712	MH5709	TRUE
71	1	1-4	A/H1N1	2013-11-27	2013-12-02	2013-11-27	2.39840653812193	4.68182098195035	1	1	UM41554	UM41553	MH5295	MH5300	TRUE
